# Supplementary material for: Combined analysis of transcriptome and metabolome reveals the molecular mechanism and candidate genes of Haloxylon drought tolerance
Source: Front Plant Sci. 2022 Oct 17;13:1020367. doi: 10.3389/fpls.2022.1020367 (PMC9622360; doi:10.3389/fpls.2022.1020367)
Supplement: Supplementary file 7 [file Table_2.xlsx]

## Sheet: LS vs HS
KEGG enrichment analysis of H. ammodendron DEGs
Category	ID	Description	GeneRatio	BgRatio	pvalue	padj	Count	geneID	up	Up_Gene_names	Down	Down_Gene_names
KEGG	ko03010	Ribosome	157|1275	448|6479	1.91709e-11	5.84712e-09	157	Cluster-6558.29369,Cluster-874.0,Cluster-776.0,Cluster-214.0,Cluster-569.0,Cluster-6558.17266,Cluster-6558.41738,Cluster-431.0,Cluster-6558.29070,Cluster-404.0,Cluster-1268.0,Cluster-6558.37864,Cluster-1189.0,Cluster-1052.0,Cluster-1285.0,Cluster-6558.5135,Cluster-6558.5134,Cluster-6558.15083,Cluster-622.0,Cluster-6558.41812,Cluster-1312.0,Cluster-6558.42358,Cluster-89.0,Cluster-6558.29163,Cluste…	137	Cluster-874.0,Cluster-776.0,Cluster-214.0,Cluster-569.0,Cluster-6558.41738,Cluster-431.0,Cluster-6558.29070,Cluster-404.0,Cluster-1268.0,Cluster-6558.37864,Cluster-1189.0,Cluster-1052.0,Cluster-1285.0,Cluster-6558.5135,Cluster-6558.5134,Cluster-6558.15083,Cluster-622.0,Cluster-6558.41812,Cluster-1312.0,Cluster-6558.42358,Cluster-89.0,Cluster-6558.4737,Cluster-356.1,Cluster-1136.0,Cluster-1978.0,C…	20	Cluster-6558.29369,Cluster-6558.17266,Cluster-6558.29163,Cluster-6558.26975,Cluster-6558.25639,Cluster-6558.16137,Cluster-6558.32183,Cluster-7101.0,Cluster-6558.13529,Cluster-6558.8490,Cluster-6558.15573,Cluster-6558.16069,Cluster-6558.11962,Cluster-6558.11961,Cluster-6558.28900,Cluster-6558.32829,Cluster-6558.17168,Cluster-15355.0,Cluster-6558.8538,Cluster-6558.14302
KEGG	ko04626	Plant-pathogen interaction	93|1275	269|6479	4.58264e-07	6.98853e-05	93	Cluster-6558.22481,Cluster-6558.6095,Cluster-6558.34360,Cluster-6558.39627,Cluster-6392.0,Cluster-13747.0,Cluster-6558.14808,Cluster-6558.25028,Cluster-6558.9219,Cluster-11575.0,Cluster-232.0,Cluster-6558.24705,Cluster-6558.16351,Cluster-6558.18562,Cluster-1392.0,Cluster-6558.7290,Cluster-6558.23929,Cluster-6558.26183,Cluster-8776.0,Cluster-6558.18654,Cluster-6558.15504,Cluster-6558.25129,Cluster…	44	Cluster-6558.34360,Cluster-6558.39627,Cluster-13747.0,Cluster-6558.9219,Cluster-11575.0,Cluster-232.0,Cluster-6558.16351,Cluster-1392.0,Cluster-6558.7290,Cluster-6558.26183,Cluster-8776.0,Cluster-6558.15504,Cluster-6558.38888,Cluster-759.0,Cluster-6558.10418,Cluster-6558.19125,Cluster-6558.38255,Cluster-3959.0,Cluster-6558.34844,Cluster-1235.0,Cluster-6558.18727,Cluster-6558.18204,Cluster-6558.38…	49	Cluster-6558.22481,Cluster-6558.6095,Cluster-6392.0,Cluster-6558.14808,Cluster-6558.25028,Cluster-6558.24705,Cluster-6558.18562,Cluster-6558.23929,Cluster-6558.18654,Cluster-6558.25129,Cluster-6558.18736,Cluster-6558.18730,Cluster-6558.18731,Cluster-6558.32772,Cluster-6558.18733,Cluster-6558.27512,Cluster-6558.15626,Cluster-6558.15699,Cluster-6558.5508,Cluster-6558.5509,Cluster-6558.5507,Cluster-…
Note:
Category: KEGG database name
ID: The unique number information of the pathway in the KEGG database
Description: Description of the KEGG term function
GeneRatio: the ratio of the number of differential genes annotated to the KEGG number to the total number of differential genes
BgRatio: The ratio of the number of background genes annotated to the KEGG number to the total number of background genes
pvalue: statistical significance level for enrichment analysis
padj: corrected pvalue, in general, pathways with padj < 0.05 are enriched items
Count: the number of differential genes annotated to this KEGG term
geneID: The ID of the differential gene annotated to the GO number
up: the number of up-regulated differential genes annotated to this KEGG term
Up_Gene_names: Up-regulated differential gene IDs annotated to this KEGG term
down: the number of down-regulated differential genes annotated to this KEGG term
Down_Gene_names: Down-regulated differential gene IDs annotated to this KEGG term

## Sheet: LB vs HB
KEGG enrichment analysis of H. persicum DEGs
Category	ID	Description	GeneRatio	BgRatio	pvalue	padj	Count	geneID	up	Up_Gene_names	Down	Down_Gene_names
KEGG	ko05133	Pertussis	98|2008	196|6870	1.27936e-05	0.00367569	98	Cluster-3181.10824,Cluster-3181.34338,Cluster-3181.26045,Cluster-3181.3504,Cluster-3181.17539,Cluster-3181.26531,Cluster-12193.0,Cluster-3181.21064,Cluster-3181.44897,Cluster-3181.29289,Cluster-3181.18767,Cluster-3181.21810,Cluster-3181.33644,Cluster-3181.542,Cluster-3181.19421,Cluster-3181.38318,Cluster-3181.29291,Cluster-3181.26199,Cluster-3181.15064,Cluster-660.0,Cluster-3181.6869,Cluster-4674…	47	Cluster-3181.3504,Cluster-3181.26531,Cluster-12193.0,Cluster-3181.21810,Cluster-3181.542,Cluster-3181.19421,Cluster-660.0,Cluster-4674.0,Cluster-181.4,Cluster-181.5,Cluster-3181.5163,Cluster-3181.2020,Cluster-15108.0,Cluster-3181.2907,Cluster-3181.33204,Cluster-3181.33203,Cluster-3181.522,Cluster-3181.10527,Cluster-3181.42098,Cluster-3181.10528,Cluster-3181.7075,Cluster-3181.7074,Cluster-3181.707…	51	Cluster-3181.10824,Cluster-3181.34338,Cluster-3181.26045,Cluster-3181.17539,Cluster-3181.21064,Cluster-3181.44897,Cluster-3181.29289,Cluster-3181.18767,Cluster-3181.33644,Cluster-3181.38318,Cluster-3181.29291,Cluster-3181.26199,Cluster-3181.15064,Cluster-3181.6869,Cluster-3181.41105,Cluster-3181.30984,Cluster-3181.21113,Cluster-3181.19437,Cluster-7468.0,Cluster-5197.0,Cluster-9282.2,Cluster-3181.…
KEGG	ko05140	Leishmaniasis	91|2008	183|6870	3.01038e-05	0.00367569	91	Cluster-3181.10824,Cluster-3181.34338,Cluster-3181.26045,Cluster-3181.3504,Cluster-3181.17539,Cluster-3181.26531,Cluster-12193.0,Cluster-3181.21064,Cluster-3181.44897,Cluster-3181.29289,Cluster-3181.18767,Cluster-3181.33644,Cluster-3181.19421,Cluster-3181.38318,Cluster-3181.29291,Cluster-3181.26199,Cluster-3181.15064,Cluster-660.0,Cluster-3181.6869,Cluster-4674.0,Cluster-181.4,Cluster-181.5,Clust…	41	Cluster-3181.3504,Cluster-3181.26531,Cluster-12193.0,Cluster-3181.19421,Cluster-660.0,Cluster-4674.0,Cluster-181.4,Cluster-181.5,Cluster-3181.5163,Cluster-3181.2020,Cluster-15108.0,Cluster-3181.2907,Cluster-3181.33204,Cluster-3181.33203,Cluster-3181.522,Cluster-3181.42098,Cluster-3181.10528,Cluster-3181.7075,Cluster-3181.7074,Cluster-3181.7076,Cluster-3181.24523,Cluster-3181.3870,Cluster-15309.0,…	50	Cluster-3181.10824,Cluster-3181.34338,Cluster-3181.26045,Cluster-3181.17539,Cluster-3181.21064,Cluster-3181.44897,Cluster-3181.29289,Cluster-3181.18767,Cluster-3181.33644,Cluster-3181.38318,Cluster-3181.29291,Cluster-3181.26199,Cluster-3181.15064,Cluster-3181.6869,Cluster-3181.41105,Cluster-3181.30984,Cluster-3181.21113,Cluster-3181.19437,Cluster-7468.0,Cluster-5197.0,Cluster-9282.2,Cluster-3181.…
KEGG	ko05162	Measles	113|2008	246|6870	5.11077e-05	0.00367569	113	Cluster-3181.10824,Cluster-3181.34338,Cluster-3181.26045,Cluster-3181.16936,Cluster-3181.3504,Cluster-3181.17539,Cluster-3181.26531,Cluster-12193.0,Cluster-3181.21064,Cluster-3181.44897,Cluster-3181.29289,Cluster-1045.0,Cluster-3181.18767,Cluster-3181.19985,Cluster-3181.33644,Cluster-3181.24734,Cluster-3181.33641,Cluster-3181.38318,Cluster-3181.29291,Cluster-3181.26199,Cluster-3181.15064,Cluster-…	60	Cluster-3181.16936,Cluster-3181.3504,Cluster-3181.26531,Cluster-12193.0,Cluster-1045.0,Cluster-3181.19985,Cluster-3181.24734,Cluster-1115.0,Cluster-660.0,Cluster-4674.0,Cluster-181.4,Cluster-181.5,Cluster-3181.5163,Cluster-3181.2020,Cluster-3181.18251,Cluster-3181.25622,Cluster-15108.0,Cluster-3181.23957,Cluster-3181.27621,Cluster-3181.2907,Cluster-3181.33204,Cluster-3181.33203,Cluster-3181.522,C…	53	Cluster-3181.10824,Cluster-3181.34338,Cluster-3181.26045,Cluster-3181.17539,Cluster-3181.21064,Cluster-3181.44897,Cluster-3181.29289,Cluster-3181.18767,Cluster-3181.33644,Cluster-3181.33641,Cluster-3181.38318,Cluster-3181.29291,Cluster-3181.26199,Cluster-3181.15064,Cluster-3181.6869,Cluster-3181.41105,Cluster-3181.19629,Cluster-3181.30984,Cluster-3181.21113,Cluster-3181.19437,Cluster-7468.0,Clust…
KEGG	ko04620	Toll-like receptor signaling pathway	92|2008	191|6870	6.75657e-05	0.00367569	92	Cluster-3181.10824,Cluster-3181.34338,Cluster-3181.26045,Cluster-3181.3504,Cluster-3181.17539,Cluster-3181.26531,Cluster-12193.0,Cluster-3181.21064,Cluster-3181.44897,Cluster-3181.29289,Cluster-3181.18767,Cluster-3181.33644,Cluster-3181.19421,Cluster-3181.38318,Cluster-3181.29291,Cluster-3181.26199,Cluster-3181.15064,Cluster-660.0,Cluster-3181.6869,Cluster-4674.0,Cluster-181.4,Cluster-181.5,Clust…	41	Cluster-3181.3504,Cluster-3181.26531,Cluster-12193.0,Cluster-3181.19421,Cluster-660.0,Cluster-4674.0,Cluster-181.4,Cluster-181.5,Cluster-3181.5163,Cluster-3181.2020,Cluster-15108.0,Cluster-3181.2907,Cluster-3181.33204,Cluster-3181.33203,Cluster-3181.522,Cluster-3181.42098,Cluster-3181.10528,Cluster-3181.7075,Cluster-3181.7074,Cluster-3181.7076,Cluster-3181.24523,Cluster-3181.3870,Cluster-15309.0,…	51	Cluster-3181.10824,Cluster-3181.34338,Cluster-3181.26045,Cluster-3181.17539,Cluster-3181.21064,Cluster-3181.44897,Cluster-3181.29289,Cluster-3181.18767,Cluster-3181.33644,Cluster-3181.38318,Cluster-3181.29291,Cluster-3181.26199,Cluster-3181.15064,Cluster-3181.6869,Cluster-3181.41105,Cluster-3181.30984,Cluster-3181.21113,Cluster-3181.19437,Cluster-7468.0,Cluster-5197.0,Cluster-9282.2,Cluster-3181.…
KEGG	ko05142	Chagas disease (American trypanosomiasis)	94|2008	197|6870	7.39769e-05	0.00367569	94	Cluster-3181.30070,Cluster-3181.10824,Cluster-3181.34338,Cluster-3181.26045,Cluster-3181.3504,Cluster-3181.17539,Cluster-3181.26531,Cluster-12193.0,Cluster-3181.21064,Cluster-3181.44897,Cluster-3181.29289,Cluster-3181.18767,Cluster-3181.30066,Cluster-3181.30065,Cluster-3181.19421,Cluster-3181.38318,Cluster-3181.29291,Cluster-3181.26199,Cluster-3181.15064,Cluster-660.0,Cluster-3181.6869,Cluster-46…	43	Cluster-3181.30070,Cluster-3181.3504,Cluster-3181.26531,Cluster-12193.0,Cluster-3181.30066,Cluster-3181.19421,Cluster-660.0,Cluster-4674.0,Cluster-181.4,Cluster-181.5,Cluster-3181.5163,Cluster-3181.2020,Cluster-15108.0,Cluster-3181.2907,Cluster-3181.33204,Cluster-3181.33203,Cluster-3181.522,Cluster-3181.42098,Cluster-3181.10528,Cluster-3181.7075,Cluster-3181.7074,Cluster-3181.7076,Cluster-3181.24…	51	Cluster-3181.10824,Cluster-3181.34338,Cluster-3181.26045,Cluster-3181.17539,Cluster-3181.21064,Cluster-3181.44897,Cluster-3181.29289,Cluster-3181.18767,Cluster-3181.30065,Cluster-3181.38318,Cluster-3181.29291,Cluster-3181.26199,Cluster-3181.15064,Cluster-3181.6869,Cluster-3181.41105,Cluster-3181.30984,Cluster-3181.21113,Cluster-3181.19437,Cluster-7468.0,Cluster-5197.0,Cluster-9282.2,Cluster-3181.…
KEGG	ko04722	Neurotrophin signaling pathway	105|2008	227|6870	7.52986e-05	0.00367569	105	Cluster-3181.10824,Cluster-3181.34338,Cluster-3181.26045,Cluster-3181.3504,Cluster-3181.17539,Cluster-3181.26531,Cluster-12193.0,Cluster-3181.21064,Cluster-3181.44897,Cluster-3181.29289,Cluster-3181.18767,Cluster-3181.19188,Cluster-3181.21810,Cluster-3181.33644,Cluster-3181.19421,Cluster-3181.38318,Cluster-3181.29291,Cluster-3181.5271,Cluster-3181.26199,Cluster-3181.15064,Cluster-660.0,Cluster-31…	51	Cluster-3181.3504,Cluster-3181.26531,Cluster-12193.0,Cluster-3181.21810,Cluster-3181.19421,Cluster-3181.5271,Cluster-660.0,Cluster-4674.0,Cluster-181.4,Cluster-181.5,Cluster-3181.5163,Cluster-3181.2020,Cluster-15108.0,Cluster-3181.2907,Cluster-3181.33204,Cluster-3181.33203,Cluster-3181.10528,Cluster-3181.522,Cluster-3181.42098,Cluster-4061.0,Cluster-3181.2345,Cluster-3181.7075,Cluster-3181.7074,C…	54	Cluster-3181.10824,Cluster-3181.34338,Cluster-3181.26045,Cluster-3181.17539,Cluster-3181.21064,Cluster-3181.44897,Cluster-3181.29289,Cluster-3181.18767,Cluster-3181.19188,Cluster-3181.33644,Cluster-3181.38318,Cluster-3181.29291,Cluster-3181.26199,Cluster-3181.15064,Cluster-3181.6869,Cluster-3181.41105,Cluster-3181.19629,Cluster-3181.30984,Cluster-3181.21113,Cluster-3181.19437,Cluster-7468.0,Clust…
KEGG	ko05145	Toxoplasmosis	115|2008	256|6870	9.03567e-05	0.00367569	115	Cluster-3181.10824,Cluster-3181.34338,Cluster-3181.26045,Cluster-3181.14203,Cluster-3181.3504,Cluster-3181.17539,Cluster-3181.26531,Cluster-12193.0,Cluster-3181.21064,Cluster-3181.44897,Cluster-3181.29289,Cluster-1045.0,Cluster-3181.18767,Cluster-3181.19985,Cluster-3181.33644,Cluster-3181.24734,Cluster-3181.33641,Cluster-3181.38318,Cluster-3181.29291,Cluster-3181.26199,Cluster-3181.15064,Cluster-…	63	Cluster-3181.3504,Cluster-3181.26531,Cluster-12193.0,Cluster-1045.0,Cluster-3181.19985,Cluster-3181.24734,Cluster-1115.0,Cluster-660.0,Cluster-4674.0,Cluster-181.4,Cluster-181.5,Cluster-3181.5163,Cluster-3181.2020,Cluster-3181.18251,Cluster-3181.25622,Cluster-15108.0,Cluster-3181.27621,Cluster-3181.2907,Cluster-3181.33204,Cluster-3181.33203,Cluster-3181.522,Cluster-3181.42098,Cluster-3181.10528,C…	52	Cluster-3181.10824,Cluster-3181.34338,Cluster-3181.26045,Cluster-3181.14203,Cluster-3181.17539,Cluster-3181.21064,Cluster-3181.44897,Cluster-3181.29289,Cluster-3181.18767,Cluster-3181.33644,Cluster-3181.33641,Cluster-3181.38318,Cluster-3181.29291,Cluster-3181.26199,Cluster-3181.15064,Cluster-3181.6869,Cluster-3181.41105,Cluster-3181.30984,Cluster-3181.21113,Cluster-3181.19437,Cluster-7468.0,Clust…
KEGG	ko05152	Tuberculosis	116|2008	259|6870	9.28393e-05	0.00367569	116	Cluster-3181.10824,Cluster-3181.34338,Cluster-3181.26045,Cluster-3181.11719,Cluster-3181.3504,Cluster-3181.17539,Cluster-3181.18767,Cluster-3181.26531,Cluster-3181.36227,Cluster-12193.0,Cluster-3181.36991,Cluster-3181.21064,Cluster-3181.44897,Cluster-3181.27935,Cluster-3181.29289,Cluster-3181.25849,Cluster-3181.15747,Cluster-3181.35270,Cluster-3181.21810,Cluster-3181.33644,Cluster-3181.33641,Clus…	55	Cluster-3181.3504,Cluster-3181.26531,Cluster-3181.36227,Cluster-12193.0,Cluster-3181.36991,Cluster-3181.27935,Cluster-3181.35270,Cluster-3181.21810,Cluster-660.0,Cluster-4674.0,Cluster-181.4,Cluster-181.5,Cluster-3181.5163,Cluster-3181.2020,Cluster-15108.0,Cluster-3181.13559,Cluster-3181.2907,Cluster-3181.33204,Cluster-3181.33203,Cluster-3181.10528,Cluster-3181.522,Cluster-3181.42098,Cluster-4061…	61	Cluster-3181.10824,Cluster-3181.34338,Cluster-3181.26045,Cluster-3181.11719,Cluster-3181.17539,Cluster-3181.18767,Cluster-3181.21064,Cluster-3181.44897,Cluster-3181.29289,Cluster-3181.25849,Cluster-3181.15747,Cluster-3181.33644,Cluster-3181.33641,Cluster-3181.38318,Cluster-3181.29291,Cluster-3181.26199,Cluster-3181.15064,Cluster-3181.6869,Cluster-3181.7029,Cluster-3181.41105,Cluster-3181.17445,Cl…
KEGG	ko04064	NF-kappa B signaling pathway	91|2008	191|6870	9.96423e-05	0.00367569	91	Cluster-3181.10824,Cluster-3181.34338,Cluster-3181.26045,Cluster-3181.16936,Cluster-3181.3504,Cluster-3181.17539,Cluster-3181.26531,Cluster-12193.0,Cluster-3181.21064,Cluster-3181.44897,Cluster-3181.29289,Cluster-3181.18767,Cluster-3181.33644,Cluster-3181.19421,Cluster-3181.38318,Cluster-3181.29291,Cluster-3181.26199,Cluster-3181.15064,Cluster-660.0,Cluster-3181.6869,Cluster-4674.0,Cluster-181.4,…	41	Cluster-3181.16936,Cluster-3181.3504,Cluster-3181.26531,Cluster-12193.0,Cluster-3181.19421,Cluster-660.0,Cluster-4674.0,Cluster-181.4,Cluster-181.5,Cluster-3181.5163,Cluster-3181.2020,Cluster-15108.0,Cluster-3181.2907,Cluster-3181.33204,Cluster-3181.33203,Cluster-3181.522,Cluster-3181.42098,Cluster-3181.10528,Cluster-3181.7075,Cluster-3181.7074,Cluster-3181.7076,Cluster-3181.24523,Cluster-3181.38…	50	Cluster-3181.10824,Cluster-3181.34338,Cluster-3181.26045,Cluster-3181.17539,Cluster-3181.21064,Cluster-3181.44897,Cluster-3181.29289,Cluster-3181.18767,Cluster-3181.33644,Cluster-3181.38318,Cluster-3181.29291,Cluster-3181.26199,Cluster-3181.15064,Cluster-3181.6869,Cluster-3181.41105,Cluster-3181.30984,Cluster-3181.21113,Cluster-3181.19437,Cluster-7468.0,Cluster-5197.0,Cluster-9282.2,Cluster-3181.…
KEGG	ko05164	Influenza A	116|2008	268|6870	0.000268094	0.00890071	116	Cluster-3181.10824,Cluster-3181.34338,Cluster-3181.26045,Cluster-3181.3504,Cluster-1205.0,Cluster-3181.17539,Cluster-3181.26531,Cluster-12193.0,Cluster-3181.21064,Cluster-3181.44897,Cluster-3181.29289,Cluster-1045.0,Cluster-3181.18767,Cluster-3181.19985,Cluster-3181.33644,Cluster-3181.24734,Cluster-3181.33641,Cluster-3181.38318,Cluster-3181.29291,Cluster-3181.4679,Cluster-3181.26199,Cluster-3181.…	65	Cluster-3181.3504,Cluster-1205.0,Cluster-3181.26531,Cluster-12193.0,Cluster-1045.0,Cluster-3181.19985,Cluster-3181.24734,Cluster-3181.4679,Cluster-1115.0,Cluster-660.0,Cluster-4674.0,Cluster-181.4,Cluster-181.5,Cluster-3181.5163,Cluster-3181.2020,Cluster-3181.18251,Cluster-3181.25622,Cluster-15108.0,Cluster-3181.27621,Cluster-3181.2907,Cluster-3181.2593,Cluster-3181.33204,Cluster-3181.33203,Clust…	51	Cluster-3181.10824,Cluster-3181.34338,Cluster-3181.26045,Cluster-3181.17539,Cluster-3181.21064,Cluster-3181.44897,Cluster-3181.29289,Cluster-3181.18767,Cluster-3181.33644,Cluster-3181.33641,Cluster-3181.38318,Cluster-3181.29291,Cluster-3181.26199,Cluster-3181.15064,Cluster-3181.6869,Cluster-3181.41105,Cluster-3181.19629,Cluster-3181.30984,Cluster-3181.21113,Cluster-3181.19437,Cluster-7468.0,Clust…
Note:
Category: KEGG database name
ID: The unique number information of the pathway in the KEGG database
Description: Description of the KEGG term function
GeneRatio: the ratio of the number of differential genes annotated to the KEGG number to the total number of differential genes
BgRatio: The ratio of the number of background genes annotated to the KEGG number to the total number of background genes
pvalue: statistical significance level for enrichment analysis
padj: corrected pvalue, in general, pathways with padj < 0.05 are enriched items
Count: the number of differential genes annotated to this KEGG term
geneID: The ID of the differential gene annotated to the GO number
up: the number of up-regulated differential genes annotated to this KEGG term
Up_Gene_names: Up-regulated differential gene IDs annotated to this KEGG term
down: the number of down-regulated differential genes annotated to this KEGG term
Down_Gene_names: Down-regulated differential gene IDs annotated to this KEGG term
