# Supplementary material for: Combined analysis of transcriptome and metabolome reveals the molecular mechanism and candidate genes of Haloxylon drought tolerance
Source: Front Plant Sci. 2022 Oct 17;13:1020367. doi: 10.3389/fpls.2022.1020367 (PMC9622360; doi:10.3389/fpls.2022.1020367)
Supplement: Supplementary file 9 [file Table_4.xlsx]

## Sheet: Sheet1
DEMs highly expressed in response to drought stress in H. ammodendron and H. persicum
		ID	Name	FC	log2FC	Pvalue	ROC	VIP	Up.Down
LS vs HS	pos	Com_620_pos	5-acetyl-2,6-dimethyl-1,2,3,4-tetrahydropyridin-4-one	226.952	7.82624	1.23588e-14	1	1.52506	up
		Com_11600_pos	Pseudoephedrine	16.7863	4.06922	1.93201e-11	1	1.51976	up
		Com_4977_pos	Sodium Houttuyfonate	17.8455	4.15749	3.07017e-11	1	1.5186	up
		Com_2857_pos	NAT13-331713_POS	12.1868	3.60724	4.71913e-11	1	1.51811	up
		Com_2115_pos	Bryodulcosigenin	29.3946	4.87748	6.68752e-11	1	1.5178	up
		Com_1104_pos	Adenosine	98.9986	6.62934	1.25972e-09	1	1.52032	up
		Com_137_pos	5-[(10Z)-14-(3,5-dihydroxyphenyl)tetradec-10-en-1-yl]benzene-1,3-diol	22.8772	4.51584	2.04794e-05	1	1.4761	up
		Com_11496_pos	Brucine	0.105252	-3.24808	3.36826e-14	1	1.52495	down
		Com_937_pos	2-[3-(4-pyridyl)-1H-1,2,4-triazol-5-yl]pyridine	0.177734	-2.49221	4.91977e-10	1	1.5145	down
		Com_14561_pos	N1-{3-[3-(2,6-dichlorophenyl)isoxazol-5-yl]phenyl}acetamide	0.0934683	-3.41938	6.66796e-10	1	1.51363	down
		Com_3838_pos	10-Deacetylasperulosidic acid	0.130732	-2.93531	1.25572e-09	1	1.51328	down
		Com_19988_pos	Crebanine	0.228797	-2.12786	1.44674e-09	1	1.5098	down
		Com_15299_pos	5,7-dihydroxy-3,8-dimethoxy-2-phenyl-4H-chromen-4-one	0.0603708	-4.05	1.71964e-09	1	1.51912	down
		Com_17256_pos	3'-Methoxy Puerarin	0.224076	-2.15794	1.80637e-07	1	1.48458	down
		Com_13386_pos	ANH	0.190277	-2.39382	5.9573e-07	1	1.47434	down
		Com_12475_pos	6-chloro-2,4-diphenyl-8-(trifluoromethyl)-3H-1,5-benzodiazepine	0.228835	-2.12762	9.87244e-07	1	1.46484	down
		Com_7623_pos	3-hydroxy-3,4-bis[(4-hydroxy-3-methoxyphenyl)methyl]oxolan-2-one	0.248009	-2.01153	8.13877e-05	1	1.40931	down
	neg	Com_106_neg	Chikusetsu saponin IVa	15.9116	3.992	6.07004e-19	1	1.30982	up
		Com_957_neg	Palmaturbine	13.6803	3.77402	3.63102e-15	1	1.30893	up
		Com_3551_neg	Synephrine	37.3851	5.22439	1.2703e-12	1	1.30753	up
		Com_8199_neg	Lanatoside C	14.1169	3.81935	8.65976e-12	1	1.30496	up
		Com_5840_neg	N1-(4-bromophenyl)-2-[4-(tert-butyl)phenoxy]propanamide	0.080021	-3.64348	1.73248e-15	1	1.3092	down
		Com_8662_neg	Protostemonine	0.0715876	-3.80415	1.56035e-12	1	1.30787	down
		Com_4063_neg	s7p	0.108544	-3.20364	6.52771e-11	1	1.30331	down
		Com_336_neg	PA (18:3/18:3)	0.124399	-3.00695	1.7819e-08	1	1.29149	down
		Com_3424_neg	PA (15:1/18:2)	0.0902033	-3.47068	4.28421e-06	1	1.25588	down
		Com_10977_neg	PMeOH (18:2-18:3)	0.0207364	-5.59169	0.000126979	1	1.25463	down
LB vs HB	pos	Com_392_pos	Monocrotaline	355.604	8.47413	7.15925e-16	1	1.22132	up
		Com_261_pos	L-Dopa	240.93	7.91247	7.0413e-15	1	1.22149	up
		Com_11206_pos	Amoxicillin	83.8719	6.39012	3.80903e-12	1	1.22168	up
		Com_1861_pos	Linderane	109.351	6.77282	2.39333e-11	1	1.22142	up
		Com_2800_pos	Maltopentaose	41.6458	5.3801	5.73166e-11	1	1.22158	up
		Com_15188_pos	4-(2,3-dihydro-1,4-benzodioxin-6-yl)butanoic acid	35.7593	5.16025	1.57719e-10	1	1.21549	up
		Com_11742_pos	Folinic acid	64.2119	6.00477	7.67624e-09	1	1.20292	up
		Com_4247_pos	Pinoresinol Diglucoside	124.51	6.96012	1.94389e-07	1	1.21764	up
		Com_678_pos	2-Phenylglycine	51.8298	5.69571	1.83929e-05	1	1.19789	up
		Com_3313_pos	N1-(1H-1,2,3-benzotriazol-5-yl)-3,4,5-trimethoxybenzamide	82.3213	6.36319	3.66206e-05	1	1.19095	up
		Com_957_pos	1-(4-methoxyphenyl)propane-1,2-diol	39.3841	5.29954	9.40365e-05	1	1.17617	up
		Com_285_pos	Sinapaldehyde glucoside	32.743	5.03311	0.00402359	1	1.03421	up
		Com_4131_pos	2-[(5-amino-4H-1,2,4-triazol-3-yl)thio]-1-(4-chlorophenyl)ethan-1-one	0.105295	-3.2475	1.82411e-12	1	1.21853	down
		Com_7947_pos	Vinblastine	0.118117	-3.08171	1.02455e-11	1	1.21728	down
		Com_4711_pos	N-(9-oxodecyl)acetamide	0.0956871	-3.38553	6.08678e-10	1	1.21324	down
		Com_3972_pos	6-Hexanoyl-D-erythro-sphingosine	0.0523394	-4.25596	1.62106e-09	1	1.21608	down
		Com_91_pos	Stearamide	0.093545	-3.41819	3.54852e-09	1	1.20686	down
		Com_2256_pos	N-Acetylsphingosine	0.106141	-3.23594	4.26137e-09	1	1.20683	down
		Com_4723_pos	Oleoyl ethylamide	0.0571788	-4.12838	1.19213e-07	1	1.19916	down
		Com_2243_pos	Glycyrrhizin	0.0863071	-3.53438	5.20697e-07	1	1.21212	down
		Com_11809_pos	Roburic acid	0.0511468	-4.28921	6.63811e-07	1	1.18606	down
	neg	Com_13856_neg	N1-(4-bromophenyl)-2-[4-(tert-butyl)phenoxy]propanamide	119.715	6.90346	3.94411e-20	1	1.19988	up
		Com_1318_neg	1,3,5-Trimethoxybenzene	184.053	7.52398	1.36671e-12	1	1.19987	up
		Com_4790_neg	4,5-diphenyl-2,3-dihydro-1H-pyrazolo[3,4-c]pyridazin-3-one	43.6511	5.44795	1.23962e-10	1	1.19932	up
		Com_8931_neg	s7p	37.7248	5.23744	2.1085e-10	1	1.19802	up
		Com_6777_neg	Glutathione	38.2474	5.25729	2.48838e-10	1	1.19927	up
		Com_1969_neg	Carminic acid	127.228	6.99127	1.268e-08	1	1.18938	up
		Com_3692_neg	Nitidine	68.0725	6.089	1.28007e-08	1	1.19794	up
		Com_8498_neg	尾-Estradiol 3,17-disulfate	54.873	5.77802	6.22551e-08	1	1.19658	up
		Com_1237_neg	Isomaltose	142.636	7.1562	9.4657e-07	1	1.19198	up
		Com_1307_neg	Vanillactic acid	53.1143	5.73103	2.98039e-06	1	1.18868	up
		Com_3726_neg	Tubuloside A	39.5393	5.30521	6.10312e-06	1	1.18447	up
		Com_5428_neg	3,6'-Disinapoyl sucrose	47.2062	5.5609	2.74558e-05	1	1.17233	up
		Com_5272_neg	Naringin	0.166099	-2.58988	1.77853e-10	1	1.19117	down
		Com_12345_neg	Nystose	0.116692	-3.09922	5.06491e-09	1	1.18961	down
		Com_3937_neg	(+/-)-Cannabichromeorcin	0.0319683	-4.96722	2.10503e-08	1	1.19586	down
		Com_25967_neg	11(Z)-Eicosenoic acid	0.118463	-3.0775	1.50582e-07	1	1.18141	down
		Com_609_neg	Guanosine 3',5'-Cyclic Monophosphate	0.0778925	-3.68237	1.34408e-06	1	1.19043	down
		Com_559_neg	N-[5-(trifluoromethyl)-2-pyridinyl]benzenesulfonamide	0.126659	-2.98098	3.56161e-05	1	1.1665	down
		Com_8629_neg	Stevioside	0.128738	-2.95749	3.60428e-05	1	1.11791	down
		Com_21399_neg	Butanedioicacid	0.17629	-2.50397	4.72861e-05	1	1.1466	down
		Com_16581_neg	Mangiferin	0.187672	-2.41372	0.0011509	1	1.08352	down
