# Supplementary material for: Combined analysis of transcriptome and metabolome reveals the molecular mechanism and candidate genes of Haloxylon drought tolerance
Source: Front Plant Sci. 2022 Oct 17;13:1020367. doi: 10.3389/fpls.2022.1020367 (PMC9622360; doi:10.3389/fpls.2022.1020367)
Supplement: Supplementary file 10 [file Table_5.xlsx]

## Sheet: LS vs HS_pos_kegg_enrichment
KEGG enrichment analysis of H. ammodendron DEMs in positive ion mode
MapID	MapTitle	Pvalue	x	y	n	N	EnrichDirect	MetaIDs	kegg_cpd_id
map00941	Flavonoid biosynthesis	0.0252121	8	13	39	122	Over	Hesperetin; Dihydrokaempferol; Galangin; Pinocembrin; Neohesperidin; Taxifolin; Kaempferol; Vitexin	cpd:C01709,cpd:C00974,cpd:C10044,cpd:C09827,cpd:C09806,cpd:C01617,cpd:C05903,cpd:C01460
map00950	Isoquinoline alkaloid biosynthesis	0.0818756	4	6	39	122	Over	Sinoacutine; L-Dopa; Tyramine; 3,4-Dihydroxybenzaldehyde	cpd:C05179,cpd:C00355,cpd:C00483,cpd:C16700
map00350	Tyrosine metabolism	0.0957248	3	4	39	122	Over	L-Dopa; Rosmarinic acid; Tyramine	cpd:C00355,cpd:C01850,cpd:C00483
map00360	Phenylalanine metabolism	0.265795	4	8	39	122	Over	Salicylic acid; Pseudoephedrine; Benzoic Acid; Phenylglyoxylic acid	cpd:C00805,cpd:C02765,cpd:C00180,cpd:C02137
map00520	Amino sugar and nucleotide sugar metabolism	0.319672	1	1	39	122	Over	N-Acetylneuraminic acid	cpd:C00270
map00780	Biotin metabolism	0.319672	1	1	39	122	Over	Biotin	cpd:C00120
map00944	Flavone and flavonol biosynthesis	0.382992	3	6	39	122	Over	Syringetin; Kaempferol; Vitexin	cpd:C11620,cpd:C05903,cpd:C01460
map00770	Pantothenate and CoA biosynthesis	0.538951	1	2	39	122	Over	Pantothenic acid	cpd:C00864
map00906	Carotenoid biosynthesis	0.538951	1	2	39	122	Over	Canthaxanthin	cpd:C08583
map00909	Sesquiterpenoid and triterpenoid biosynthesis	0.538951	1	2	39	122	Over	Gossypol	cpd:C07667
map00965	Betalain biosynthesis	0.538951	1	2	39	122	Over	L-Dopa	cpd:C00355
map01200	Carbon metabolism	0.538951	1	2	39	122	Over	O-Phospho-L-serine	cpd:C01005
map04075	Plant hormone signal transduction	0.538951	1	2	39	122	Over	Salicylic acid	cpd:C00805
map02010	ABC transporters	1	4	12	39	122	Over	Glutathione; Vitamin B12; Biotin; 1,2-Benzenedicarboxylic acid	cpd:C00051,cpd:C05776,cpd:C00120,cpd:C01606
map00240	Pyrimidine metabolism	1	1	3	39	122	Over	Cytidine-5'-monophosphate	cpd:C00055
map00270	Cysteine and methionine metabolism	1	2	6	39	122	Over	Glutathione; O-Phospho-L-serine	cpd:C00051,cpd:C01005
map00340	Histidine metabolism	1	1	3	39	122	Over	Histamine	cpd:C00388
Note:
MapID: ID of the enriched KEGG Pathway
MapTitle: Enriched KEGG Pathway Names
Pvalue: P value for enrichment analysis
x: number of differential metabolites associated with this pathwa
y: number of background (all) metabolites associated with this pathway
n: number of differential metabolites annotated by KEGG
N: number of KEGG-annotated background (all) metabolites
Enrich Direct: Enrichment points, Over represents enrichment, ie x/n>y/N
MetaIDs: List of enriched metabolites
kegg_cpd_id: ID of the metabolite in the KEGG database

## Sheet: LS vs HS_neg_kegg_enrichment
KEGG enrichment analysis of H. ammodendron DEMs in negative ion mode
MapID	MapTitle	Pvalue	x	y	n	N	EnrichDirect	MetaIDs	kegg_cpd_id
map01040	Biosynthesis of unsaturated fatty acids	0.0222203	4	4	38	96	Over	Lignoceric Acid; Erucic acid; Docosanoic acid; Arachidic acid	cpd:C08320,cpd:C08316,cpd:C08281,cpd:C06425
map00950	Isoquinoline alkaloid biosynthesis	0.0590426	3	3	38	96	Over	Stylopine; Sanguinarine; Levodopa	cpd:C05175,cpd:C06162,cpd:C00355
map00010	Glycolysis / Gluconeogenesis	0.154167	2	2	38	96	Over	β-D-Fructose 6-phosphate; Arbutin	cpd:C05345,cpd:C06186
map00051	Fructose and mannose metabolism	0.154167	2	2	38	96	Over	β-D-Fructose 6-phosphate; D-Mannose 6-phosphate	cpd:C05345,cpd:C00275
map00520	Amino sugar and nucleotide sugar metabolism	0.154167	2	2	38	96	Over	β-D-Fructose 6-phosphate; D-Mannose 6-phosphate	cpd:C05345,cpd:C00275
map00906	Carotenoid biosynthesis	0.154167	2	2	38	96	Over	Farnesyl pyrophosphate; Abscisic Acid	cpd:C00448,cpd:C06082
map04075	Plant hormone signal transduction	0.154167	2	2	38	96	Over	Jasmonic acid; Abscisic Acid	cpd:C08491,cpd:C06082
map00941	Flavonoid biosynthesis	0.20966	4	6	38	96	Over	Chlorogenic acid; Luteolin; Naringenin; Chrysin	cpd:C00852,cpd:C01514,cpd:C00509,cpd:C10028
map01110	Biosynthesis of secondary metabolites	0.338371	21	46	38	96	Over	β-D-Fructose 6-phosphate; Jasmonic acid; Farnesyl pyrophosphate; Abscisic Acid; L-Histidine; Chlorogenic acid; Gentiopicrin; Citric acid; trans-Cinnamic acid; Protoporphyrin IX; Stylopine; Protocatechuic acid; Luteolin; Trehalose; Naringenin; beta-Tocopherol; Geniposidic acid; Coniferyl alcohol; L-Tryptophan; D-Mannose 6-phosphate; Levodopa	cpd:C05345,cpd:C08491,cpd:C00448,cpd:C06082,cpd:C00135,cpd:C00852,cpd:C09782,cpd:C00158,cpd:C00423,cpd:C02191,cpd:C05175,cpd:C00230,cpd:C01514,cpd:C01083,cpd:C00509,cpd:C14152,cpd:C11673,cpd:C00590,cpd:C00078,cpd:C00275,cpd:C00355
map00940	Phenylpropanoid biosynthesis	0.381356	3	5	38	96	Over	Chlorogenic acid; trans-Cinnamic acid; Coniferyl alcohol	cpd:C00852,cpd:C00423,cpd:C00590
map00073	Cutin, suberine and wax biosynthesis	0.395833	1	1	38	96	Over	Docosanoic acid	cpd:C08281
map00100	Steroid biosynthesis	0.395833	1	1	38	96	Over	Farnesyl pyrophosphate	cpd:C00448
map00790	Folate biosynthesis	0.395833	1	1	38	96	Over	Dihydrofolic acid	cpd:C00415
map00901	Indole alkaloid biosynthesis	0.395833	1	1	38	96	Over	L-Tryptophan	cpd:C00078
map00909	Sesquiterpenoid and triterpenoid biosynthesis	0.395833	1	1	38	96	Over	Farnesyl pyrophosphate	cpd:C00448
map00943	Isoflavonoid biosynthesis	0.395833	1	1	38	96	Over	Naringenin	cpd:C00509
map00945	Stilbenoid, diarylheptanoid and gingerol biosynthesis	0.395833	1	1	38	96	Over	Chlorogenic acid	cpd:C00852
map00965	Betalain biosynthesis	0.395833	1	1	38	96	Over	Levodopa	cpd:C00355
map00966	Glucosinolate biosynthesis	0.395833	1	1	38	96	Over	L-Tryptophan	cpd:C00078
map01230	Biosynthesis of amino acids	0.475776	5	9	38	96	Over	β-D-Fructose 6-phosphate; S-Sulfo-L-cysteine; L-Histidine; Citric acid; L-Tryptophan	cpd:C05345,cpd:C05824,cpd:C00135,cpd:C00158,cpd:C00078
map00130	Ubiquinone and other terpenoid-quinone biosynthesis	0.560372	2	3	38	96	Over	trans-Cinnamic acid; beta-Tocopherol	cpd:C00423,cpd:C14152
map00350	Tyrosine metabolism	0.560372	2	3	38	96	Over	Salidroside; Levodopa	cpd:C06046,cpd:C00355
map00400	Phenylalanine, tyrosine and tryptophan biosynthesis	0.560372	2	3	38	96	Over	Protocatechuic acid; L-Tryptophan	cpd:C00230,cpd:C00078
map00360	Phenylalanine metabolism	0.647037	2	4	38	96	Over	trans-Cinnamic acid; Phenylacetaldehyde	cpd:C00423,cpd:C00601
map00970	Aminoacyl-tRNA biosynthesis	0.647037	2	4	38	96	Over	L-Histidine; L-Tryptophan	cpd:C00135,cpd:C00078
map00020	Citrate cycle (TCA cycle)	1	1	2	38	96	Over	Citric acid	cpd:C00158
map00030	Pentose phosphate pathway	1	1	2	38	96	Over	β-D-Fructose 6-phosphate	cpd:C05345
map00040	Pentose and glucuronate interconversions	1	1	2	38	96	Over	D-Xylulose	cpd:C00310
map00250	Alanine, aspartate and glutamate metabolism	1	1	2	38	96	Over	Citric acid	cpd:C00158
map00260	Glycine, serine and threonine metabolism	1	1	2	38	96	Over	L-Tryptophan	cpd:C00078
map00340	Histidine metabolism	1	1	2	38	96	Over	L-Histidine	cpd:C00135
map00410	beta-Alanine metabolism	1	1	2	38	96	Over	L-Histidine	cpd:C00135
map00670	One carbon pool by folate	1	1	2	38	96	Over	Dihydrofolic acid	cpd:C00415
map00860	Porphyrin and chlorophyll metabolism	1	1	2	38	96	Over	Protoporphyrin IX	cpd:C02191
map00900	Terpenoid backbone biosynthesis	1	1	2	38	96	Over	Farnesyl pyrophosphate	cpd:C00448
map00902	Monoterpenoid biosynthesis	1	1	2	38	96	Over	Geniposidic acid	cpd:C11673
map00944	Flavone and flavonol biosynthesis	1	2	5	38	96	Over	Isovitexin; Luteolin	cpd:C01714,cpd:C01514
map01200	Carbon metabolism	1	2	5	38	96	Over	β-D-Fructose 6-phosphate; Citric acid	cpd:C05345,cpd:C00158
map01210	2-Oxocarboxylic acid metabolism	1	2	5	38	96	Over	Citric acid; L-Tryptophan	cpd:C00158,cpd:C00078
Note:
MapID: ID of the enriched KEGG Pathway
MapTitle: Enriched KEGG Pathway Names
Pvalue: P value for enrichment analysis
x: number of differential metabolites associated with this pathwa
y: number of background (all) metabolites associated with this pathway
n: number of differential metabolites annotated by KEGG
N: number of KEGG-annotated background (all) metabolites
Enrich Direct: Enrichment points, Over represents enrichment, ie x/n>y/N
MetaIDs: List of enriched metabolites
kegg_cpd_id: ID of the metabolite in the KEGG database
