# Supplementary material for: Combined analysis of transcriptome and metabolome reveals the molecular mechanism and candidate genes of Haloxylon drought tolerance
Source: Front Plant Sci. 2022 Oct 17;13:1020367. doi: 10.3389/fpls.2022.1020367 (PMC9622360; doi:10.3389/fpls.2022.1020367)
Supplement: Supplementary file 11 [file Table_6.xlsx]

## Sheet: LB vs HB_pos_kegg_enrichment
KEGG enrichment analysis of H. persicum DEMs in positive ion mode
MapID	MapTitle	Pvalue	x	y	n	N	EnrichDirect	MetaIDs	kegg_cpd_id
map00960	Tropane, piperidine and pyridine alkaloid biosynthesis	0.0249902	5	5	57	117	Over	Pipecolic acid; lupinine; Senecionine; Tropine; L-Phenylalanine	cpd:C00408,cpd:C10773,cpd:C06176,cpd:C00729,cpd:C00079
map00950	Isoquinoline alkaloid biosynthesis	0.0570199	6	7	57	117	Over	p-Coumaric acid; Tyramine; 3,4-Dihydroxybenzaldehyde; Sinoacutine; L-Dopa; Berberine	cpd:C00811,cpd:C00483,cpd:C16700,cpd:C05179,cpd:C00355,cpd:C00757
map00240	Pyrimidine metabolism	0.23519	2	2	57	117	Over	Cytosine; Cytidine	cpd:C00380,cpd:C00475
map00250	Alanine, aspartate and glutamate metabolism	0.23519	2	2	57	117	Over	alpha-Ketoglutaric acid; L-Asparagine	cpd:C00026,cpd:C00152
map00300	Lysine biosynthesis	0.23519	2	2	57	117	Over	L-Saccharopine; alpha-Ketoglutaric acid	cpd:C00449,cpd:C00026
map00310	Lysine degradation	0.23519	2	2	57	117	Over	Pipecolic acid; L-Saccharopine	cpd:C00408,cpd:C00449
map00564	Glycerophospholipid metabolism	0.23519	2	2	57	117	Over	Phosphocholine; Choline	cpd:C00588,cpd:C00114
map00780	Biotin metabolism	0.23519	2	2	57	117	Over	Biocytin; Biotin	cpd:C05552,cpd:C00120
map01230	Biosynthesis of amino acids	0.263994	5	7	57	117	Over	L-Saccharopine; S-Adenosylmethionine; Shikimic Acid; L-Phenylalanine; L-Asparagine	cpd:C00449,cpd:C00019,cpd:C00493,cpd:C00079,cpd:C00152
map02010	ABC transporters	0.263994	5	7	57	117	Over	Betaine; L-Phenylalanine; Inositol; Biotin; Choline	cpd:C00719,cpd:C00079,cpd:C00137,cpd:C00120,cpd:C00114
map00350	Tyrosine metabolism	0.355861	3	4	57	117	Over	p-Coumaric acid; Tyramine; L-Dopa	cpd:C00811,cpd:C00483,cpd:C00355
map01100	Metabolic pathways	0.373906	36	68	57	117	Over	Betaine; p-Coumaric acid; Quercetin; Biocytin; Folinic acid; Pipecolic acid; L-Saccharopine; S-Adenosylmethionine; Menaquinone; Estriol; Isoquercitrin; Catechol; Sinoacutine; D-Proline; Tropine; Thromboxane B2; L-Dopa; Phosphocholine; Benzoic Acid; Protocatechuic acid; Shikimic Acid; Mevalonic acid; Cytosine; Riboflavin; L-Phenylalanine; Hypoxanthine; Abscisic Acid; Cytidine; Inositol; Indole-3-a…	cpd:C00719,cpd:C00811,cpd:C00389,cpd:C05552,cpd:C03479,cpd:C00408,cpd:C00449,cpd:C00019,cpd:C00828,cpd:C05141,cpd:C05623,cpd:C00090;cpd:C15571,cpd:C05179,cpd:C00763,cpd:C00729,cpd:C05963,cpd:C00355,cpd:C00588,cpd:C00180,cpd:C00230,cpd:C00493,cpd:C00418,cpd:C00380,cpd:C00255,cpd:C00079,cpd:C00262,cpd:C06082,cpd:C00475,cpd:C00137,cpd:C00954,cpd:C00152,cpd:C00120,cpd:C00114,cpd:C00242,cpd:C05903,cpd…
map00020	Citrate cycle (TCA cycle)	0.487179	1	1	57	117	Over	alpha-Ketoglutaric acid	cpd:C00026
map00040	Pentose and glucuronate interconversions	0.487179	1	1	57	117	Over	alpha-Ketoglutaric acid	cpd:C00026
map00052	Galactose metabolism	0.487179	1	1	57	117	Over	Inositol	cpd:C00137
map00220	Arginine biosynthesis	0.487179	1	1	57	117	Over	alpha-Ketoglutaric acid	cpd:C00026
map00430	Taurine and hypotaurine metabolism	0.487179	1	1	57	117	Over	alpha-Ketoglutaric acid	cpd:C00026
map00440	Phosphonate and phosphinate metabolism	0.487179	1	1	57	117	Over	Bialaphos	cpd:C06457
map00562	Inositol phosphate metabolism	0.487179	1	1	57	117	Over	Inositol	cpd:C00137
map00590	Arachidonic acid metabolism	0.487179	1	1	57	117	Over	Thromboxane B2	cpd:C05963
map00630	Glyoxylate and dicarboxylate metabolism	0.487179	1	1	57	117	Over	alpha-Ketoglutaric acid	cpd:C00026
map00650	Butanoate metabolism	0.487179	1	1	57	117	Over	alpha-Ketoglutaric acid	cpd:C00026
map00660	C5-Branched dibasic acid metabolism	0.487179	1	1	57	117	Over	alpha-Ketoglutaric acid	cpd:C00026
map00670	One carbon pool by folate	0.487179	1	1	57	117	Over	Folinic acid	cpd:C03479
map00860	Porphyrin and chlorophyll metabolism	0.487179	1	1	57	117	Over	Pheophorbide A	cpd:C18021
map00900	Terpenoid backbone biosynthesis	0.487179	1	1	57	117	Over	Mevalonic acid	cpd:C00418
map00906	Carotenoid biosynthesis	0.487179	1	1	57	117	Over	Abscisic Acid	cpd:C06082
map01210	2-Oxocarboxylic acid metabolism	0.487179	1	1	57	117	Over	L-Phenylalanine	cpd:C00079
map04070	Phosphatidylinositol signaling system	0.487179	1	1	57	117	Over	Inositol	cpd:C00137
map04122	Sulfur relay system	0.487179	1	1	57	117	Over	S-Adenosylmethionine	cpd:C00019
map00053	Ascorbate and aldarate metabolism	0.612155	2	3	57	117	Over	alpha-Ketoglutaric acid; Inositol	cpd:C00026,cpd:C00137
map00260	Glycine, serine and threonine metabolism	0.612155	2	3	57	117	Over	Betaine; Choline	cpd:C00719,cpd:C00114
map00330	Arginine and proline metabolism	0.612155	2	3	57	117	Over	S-Adenosylmethionine; D-Proline	cpd:C00019,cpd:C00763
map00460	Cyanoamino acid metabolism	0.612155	2	3	57	117	Over	L-Phenylalanine; L-Asparagine	cpd:C00079,cpd:C00152
map04075	Plant hormone signal transduction	0.612155	2	3	57	117	Over	Abscisic Acid; Indole-3-acetic acid	cpd:C06082,cpd:C00954
map00944	Flavone and flavonol biosynthesis	0.712304	4	7	57	117	Over	Quercetin; Isoquercitrin; Quercitrin; Kaempferol	cpd:C00389,cpd:C05623,cpd:C01750,cpd:C05903
map01110	Biosynthesis of secondary metabolites	0.779613	30	59	57	117	Over	Bergapten; p-Coumaric acid; Tyramine; Quercetin; Pipecolic acid; L-Saccharopine; S-Adenosylmethionine; Menaquinone; Isoquercitrin; (+)-Catechin; lupinine; Sinoacutine; Senecionine; Tropine; Bisdemethoxycurcumin; L-Dopa; Benzoic Acid; Protocatechuic acid; Shikimic Acid; Mevalonic acid; Riboflavin; Piceatannol; L-Phenylalanine; Pheophorbide A; Abscisic Acid; Camptothecin; Berberine; L-Asparagine; V…	cpd:C01557,cpd:C00811,cpd:C00483,cpd:C00389,cpd:C00408,cpd:C00449,cpd:C00019,cpd:C00828,cpd:C05623,cpd:C06562,cpd:C10773,cpd:C05179,cpd:C06176,cpd:C00729,cpd:C17743,cpd:C00355,cpd:C00180,cpd:C00230,cpd:C00493,cpd:C00418,cpd:C00255,cpd:C05901,cpd:C00079,cpd:C18021,cpd:C06082,cpd:C01897,cpd:C00757,cpd:C00152,cpd:C07201,cpd:C05903
map00970	Aminoacyl-tRNA biosynthesis	1	2	4	57	117	Over	L-Phenylalanine; L-Asparagine	cpd:C00079,cpd:C00152
map00100	Steroid biosynthesis	1	1	2	57	117	Over	Vitamin D2	cpd:C05441
map00261	Monobactam biosynthesis	1	1	2	57	117	Over	S-Adenosylmethionine	cpd:C00019
map00340	Histidine metabolism	1	1	2	57	117	Over	alpha-Ketoglutaric acid	cpd:C00026
map00400	Phenylalanine, tyrosine and tryptophan biosynthesis	1	3	6	57	117	Over	Protocatechuic acid; Shikimic Acid; L-Phenylalanine	cpd:C00230,cpd:C00493,cpd:C00079
map00740	Riboflavin metabolism	1	1	2	57	117	Over	Riboflavin	cpd:C00255
map00760	Nicotinate and nicotinamide metabolism	1	1	2	57	117	Over	Trigonelline	cpd:C01004
map00908	Zeatin biosynthesis	1	1	2	57	117	Over	S-Adenosylmethionine	cpd:C00019
map00965	Betalain biosynthesis	1	1	2	57	117	Over	L-Dopa	cpd:C00355
map00966	Glucosinolate biosynthesis	1	1	2	57	117	Over	L-Phenylalanine	cpd:C00079
Note:
MapID: ID of the enriched KEGG Pathway
MapTitle: Enriched KEGG Pathway Names
Pvalue: P value for enrichment analysis
x: number of differential metabolites associated with this pathwa
y: number of background (all) metabolites associated with this pathway
n: number of differential metabolites annotated by KEGG
N: number of KEGG-annotated background (all) metabolites
Enrich Direct: Enrichment points, Over represents enrichment, ie x/n>y/N
MetaIDs: List of enriched metabolites
kegg_cpd_id: ID of the metabolite in the KEGG database

## Sheet: LB vs HB_neg_kegg_enrichment
KEGG enrichment analysis of H. persicum DEMs in negative ion mode
MapID	MapTitle	Pvalue	x	y	n	N	EnrichDirect	MetaIDs	kegg_cpd_id
map01110	Biosynthesis of secondary metabolites	0.0428623	27	39	61	111	Over	Luteolin; Caffeine; Coniferyl alcohol; D-Ribulose 1,5-bisphosphate; Gluconolactone; (-)-Menthol; Geniposidic acid; L-Glutamic acid; L-Tryptophan; Gentiopicrin; Ascorbic acid; Formononetin; 2-Isopropylmalic acid; trans-Cinnamic acid; Citric acid; Jasmonic acid; L-Histidine; Ferulaldehyde; α,α-Trehalose; Caffeic acid; Pelargonidin chloride; Rutin; Scopolin; Gibberellin A7; 7-Hydroxycoumarin; Gibber…	cpd:C01514,cpd:C07481,cpd:C00590,cpd:C01182,cpd:C00198,cpd:C00400,cpd:C11673,cpd:C00025,cpd:C00078,cpd:C09782,cpd:C00072,cpd:C00858,cpd:C02504,cpd:C00423,cpd:C00158,cpd:C08491,cpd:C00135,cpd:C02666,cpd:C01083,cpd:C01197;cpd:C01481,cpd:C05904,cpd:C05625,cpd:C01527,cpd:C11867,cpd:C09315,cpd:C01699,cpd:C09189
map00053	Ascorbate and aldarate metabolism	0.0629495	5	5	61	111	Over	D-Saccharic acid; D-Glucaric acid; Ascorbic acid; D-Galacturonic acid; Dehydroascorbic acid	cpd:C00818,cpd:C00818,cpd:C00072,cpd:C00333,cpd:C05422
map00480	Glutathione metabolism	0.0629495	5	5	61	111	Over	L-Glutamic acid; Ascorbic acid; Dehydroascorbic acid; Glutathione; Oxidized glutathione	cpd:C00025,cpd:C00072,cpd:C05422,cpd:C00051,cpd:C00127
map00970	Aminoacyl-tRNA biosynthesis	0.125589	4	4	61	111	Over	10-Formyl-THF; L-Glutamic acid; L-Tryptophan; L-Histidine	cpd:C00234,cpd:C00025,cpd:C00078,cpd:C00135
map00230	Purine metabolism	0.219993	5	6	61	111	Over	Guanosine 5'-diphosphate; Guanosine; Cyclic AMP; Adenine; Guanosine 3',5'-Cyclic Monophosphate	cpd:C00035,cpd:C00387,cpd:C00575,cpd:C00147,cpd:C00942
map00630	Glyoxylate and dicarboxylate metabolism	0.219993	5	6	61	111	Over	Succinic acid; D-Ribulose 1,5-bisphosphate; L-Glutamic acid; Citric acid; Tartaric acid	cpd:C00042,cpd:C01182,cpd:C00025,cpd:C00158,cpd:C00898
map00500	Starch and sucrose metabolism	0.250614	3	3	61	111	Over	Isomaltose; Sucrose; α,α-Trehalose	cpd:C00252,cpd:C00089,cpd:C01083
map01200	Carbon metabolism	0.376148	4	5	61	111	Over	D-Ribulose 1,5-bisphosphate; 10-Formyl-THF; Gluconolactone; Citric acid	cpd:C01182,cpd:C00234,cpd:C00198,cpd:C00158
map01210	2-Oxocarboxylic acid metabolism	0.376148	4	5	61	111	Over	L-Tryptophan; 2-Isopropylmalic acid; Citric acid; Citraconic acid	cpd:C00078,cpd:C02504,cpd:C00158,cpd:C02226
map00360	Phenylalanine metabolism	0.454804	5	7	61	111	Over	Succinic acid; Phenylglyoxylic acid; trans-Cinnamic acid; N-Acetyl-L-phenylalanine; D-Phenylalanine	cpd:C00042,cpd:C02137,cpd:C00423,cpd:C03519,cpd:C02265
map00940	Phenylpropanoid biosynthesis	0.454804	5	7	61	111	Over	Coniferyl alcohol; trans-Cinnamic acid; Ferulaldehyde; Caffeic acid; Scopolin	cpd:C00590,cpd:C00423,cpd:C02666,cpd:C01197;cpd:C01481,cpd:C01527
map00020	Citrate cycle (TCA cycle)	0.500409	2	2	61	111	Over	Succinic acid; Citric acid	cpd:C00042,cpd:C00158
map00290	Valine, leucine and isoleucine biosynthesis	0.500409	2	2	61	111	Over	2-Isopropylmalic acid; Citraconic acid	cpd:C02504,cpd:C02226
map00332	Carbapenem biosynthesis	0.500409	2	2	61	111	Over	L-Glutamic acid; Pantetheine	cpd:C00025,cpd:C00831
map00340	Histidine metabolism	0.500409	2	2	61	111	Over	L-Glutamic acid; L-Histidine	cpd:C00025,cpd:C00135
map00620	Pyruvate metabolism	0.500409	2	2	61	111	Over	Succinic acid; 2-Isopropylmalic acid	cpd:C00042,cpd:C02504
map00650	Butanoate metabolism	0.500409	2	2	61	111	Over	Succinic acid; L-Glutamic acid	cpd:C00042,cpd:C00025
map00760	Nicotinate and nicotinamide metabolism	0.500409	2	2	61	111	Over	Succinic acid; Nicotinuric Acid	cpd:C00042,cpd:C05380
map00904	Diterpenoid biosynthesis	0.500409	2	2	61	111	Over	Gibberellin A7; Gibberellic acid	cpd:C11867,cpd:C01699
map00250	Alanine, aspartate and glutamate metabolism	0.625689	3	4	61	111	Over	Succinic acid; L-Glutamic acid; Citric acid	cpd:C00042,cpd:C00025,cpd:C00158
map01100	Metabolic pathways	0.707814	35	61	61	111	Over	Luteolin; D-Saccharic acid; Homovanillic acid; D-Glucaric acid; Caffeine; Sucrose; Coniferyl alcohol; D-Ribulose 1,5-bisphosphate; 10-Formyl-THF; Guanosine 5'-diphosphate; Gluconolactone; Guanosine; L-Glutamic acid; L-Tryptophan; Desthiobiotin; Thymine; Ascorbic acid; Adenine; 2-Isopropylmalic acid; trans-Cinnamic acid; Citric acid; Jasmonic acid; L-Histidine; 4-Hydroxybenzaldehyde; Ferulaldehyde…	cpd:C01514,cpd:C00818,cpd:C05582,cpd:C00818,cpd:C07481,cpd:C00089,cpd:C00590,cpd:C01182,cpd:C00234,cpd:C00035,cpd:C00198,cpd:C00387,cpd:C00025,cpd:C00078,cpd:C01909,cpd:C00178,cpd:C00072,cpd:C00147,cpd:C02504,cpd:C00423,cpd:C00158,cpd:C08491,cpd:C00135,cpd:C00633,cpd:C02666,cpd:C01083,cpd:C00333,cpd:C01197;cpd:C01481,cpd:C05904,cpd:C05625,cpd:C00105,cpd:C02226,cpd:C05422,cpd:C00051,cpd:C02140
map00010	Glycolysis / Gluconeogenesis	1	1	1	61	111	Over	Arbutin	cpd:C06186
map00030	Pentose phosphate pathway	1	1	1	61	111	Over	Gluconolactone	cpd:C00198
map00073	Cutin, suberine and wax biosynthesis	1	1	1	61	111	Over	Docosanoic Acid	cpd:C08281
map00130	Ubiquinone and other terpenoid-quinone biosynthesis	1	1	1	61	111	Over	trans-Cinnamic acid	cpd:C00423
map00190	Oxidative phosphorylation	1	1	1	61	111	Over	Succinic acid	cpd:C00042
map00330	Arginine and proline metabolism	1	1	1	61	111	Over	L-Glutamic acid	cpd:C00025
map00400	Phenylalanine, tyrosine and tryptophan biosynthesis	1	1	1	61	111	Over	L-Tryptophan	cpd:C00078
map00430	Taurine and hypotaurine metabolism	1	1	1	61	111	Over	L-Glutamic acid	cpd:C00025
map00520	Amino sugar and nucleotide sugar metabolism	1	1	1	61	111	Over	D-Galacturonic acid	cpd:C00333
map00640	Propanoate metabolism	1	1	1	61	111	Over	Succinic acid	cpd:C00042
map00660	C5-Branched dibasic acid metabolism	1	3	5	61	111	Over	L-Glutamic acid; Methylenesuccinic acid; Citraconic acid	cpd:C00025,cpd:C00490,cpd:C02226
map00670	One carbon pool by folate	1	1	1	61	111	Over	10-Formyl-THF	cpd:C00234
map00710	Carbon fixation in photosynthetic organisms	1	1	1	61	111	Over	D-Ribulose 1,5-bisphosphate	cpd:C01182
map00770	Pantothenate and CoA biosynthesis	1	1	1	61	111	Over	Pantetheine	cpd:C00831
map00780	Biotin metabolism	1	1	1	61	111	Over	Desthiobiotin	cpd:C01909
map00860	Porphyrin and chlorophyll metabolism	1	1	1	61	111	Over	L-Glutamic acid	cpd:C00025
map00901	Indole alkaloid biosynthesis	1	1	1	61	111	Over	L-Tryptophan	cpd:C00078
map00902	Monoterpenoid biosynthesis	1	2	3	61	111	Over	(-)-Menthol; Geniposidic acid	cpd:C00400,cpd:C11673
map00908	Zeatin biosynthesis	1	1	1	61	111	Over	Adenine	cpd:C00147
map00910	Nitrogen metabolism	1	1	1	61	111	Over	L-Glutamic acid	cpd:C00025
map00941	Flavonoid biosynthesis	1	3	5	61	111	Over	Luteolin; Naringin; Pelargonidin chloride	cpd:C01514,cpd:C09789,cpd:C05904
map00943	Isoflavonoid biosynthesis	1	1	1	61	111	Over	Formononetin	cpd:C00858
map00944	Flavone and flavonol biosynthesis	1	3	5	61	111	Over	Luteolin; Syringetin; Rutin	cpd:C01514,cpd:C11620,cpd:C05625
map00966	Glucosinolate biosynthesis	1	1	1	61	111	Over	L-Tryptophan	cpd:C00078
map01040	Biosynthesis of unsaturated fatty acids	1	2	3	61	111	Over	Lignoceric Acid; Docosanoic Acid	cpd:C08320,cpd:C08281
map03013	RNA transport	1	1	1	61	111	Over	Guanosine 5'-diphosphate	cpd:C00035
map04075	Plant hormone signal transduction	1	1	1	61	111	Over	Jasmonic acid	cpd:C08491
map04144	Endocytosis	1	1	1	61	111	Over	Guanosine 5'-diphosphate	cpd:C00035
Note:
MapID: ID of the enriched KEGG Pathway
MapTitle: Enriched KEGG Pathway Names
Pvalue: P value for enrichment analysis
x: number of differential metabolites associated with this pathwa
y: number of background (all) metabolites associated with this pathway
n: number of differential metabolites annotated by KEGG
N: number of KEGG-annotated background (all) metabolites
Enrich Direct: Enrichment points, Over represents enrichment, ie x/n>y/N
MetaIDs: List of enriched metabolites
kegg_cpd_id: ID of the metabolite in the KEGG database
