# Supplementary material for: Combined analysis of transcriptome and metabolome reveals the molecular mechanism and candidate genes of Haloxylon drought tolerance
Source: Front Plant Sci. 2022 Oct 17;13:1020367. doi: 10.3389/fpls.2022.1020367 (PMC9622360; doi:10.3389/fpls.2022.1020367)
Supplement: Supplementary file 12 [file Table_7.xlsx]

## Sheet: Transcriptome and Metabolome
Candidate differential genes in response to drought stress in H. ammodendron
Pathway	Cutin, suberine and wax biosynthesis
Metabolite	FC	log2FC	Pvalue	VIP	Up/Down	pos/neg
Docosanoic acid	0.4775	-1.06643	0.000834533	1.15352	down	neg
GeneID	log2FoldChange	pval	padj	Gene annotation
Cluster-9249.0	1.3424	0.014181	0.040655	omega-hydroxypalmitate O-feruloyl transferase
Cluster-8962.0	2.8343	6.65e-40	2.24e-38	fatty acid omega-hydroxylase
Cluster-6558.3735	8.3723	4.2e-45	1.61e-43	Very-long-chain aldehyde decarbonylase CER1
Cluster-6558.30032	1.446	2.12e-176	3.9e-174	Very-long-chain aldehyde decarbonylase CER1
Cluster-6558.27588	2.5863	1.06e-08	7.91e-08	fatty acid omega-hydroxylase
Cluster-6558.2054	2.3866	6.99e-35	2.02e-33	omega-hydroxypalmitate O-feruloyl transferase
Cluster-6558.1933	2.1409	2.2e-15	2.85e-14	alcohol-forming fatty acyl-CoA reductase
Cluster-6558.1671	1.4949	1.41e-06	8.19e-06	alcohol-forming fatty acyl-CoA reductase
Cluster-6558.1339	2.2828	7.51e-07	4.52e-06	alcohol-forming fatty acyl-CoA reductase
Pathway	Carotenoid biosynthesis
Metabolite	FC	log2FC	Pvalue	VIP	Up/Down	pos/neg
Canthaxanthin	0.391097	-1.3544	0.00105178	1.31854	down	pos
Farnesyl pyrophosphate	12.1058	3.59763	3.66832e-07	1.30047	up	neg
Abscisic Acid	0.533854	-0.905484	3.18944e-08	1.2869	down	neg
GeneID	log2FoldChange	pval	padj	Gene annotation
Cluster-6558.20012	1.0321	1.69e-35	4.99e-34	9-cis-epoxycarotenoid dioxygenase, NCED
Cluster-6558.3737	1.8282	1.06e-184	2.1e-182	(+)-abscisic acid 8'-hydroxylase
Cluster-6558.12220	1.892	5.17e-26	1.12e-24	zeta-carotene isomerase, Z-ISO
Cluster-6558.12406	-1.7074	5.82e-22	1.07e-20	zeta-carotene isomerase, Z-ISO
Cluster-6558.42133	2.211	7.91e-33	2.15e-31	9-cis-epoxycarotenoid dioxygenase, NCED
Pathway	Plant hormone signal transduction
Metabolite	FC	log2FC	Pvalue	VIP	Up/Down	pos/neg
Salicylic acid	2.57581	1.36503	7.24957e-08	1.48874	up	pos
Jasmonic acid	0.518712	-0.946995	1.70073e-09	1.30386	down	neg
Abscisic Acid	0.533854	-0.905484	3.18944e-08	1.2869	down	neg
GeneID	log2FoldChange	pval	padj	Gene annotation
Cluster-9618.0	2.7788	0.0055215	0.017553	Auxin responsive protein
Cluster-9600.0	-1.2124	4.9e-15	6.21e-14	Auxin responsive protein
Cluster-6926.0	1.2922	3.81e-11	3.61e-10	regulatory protein NPR5-like
Cluster-6558.7722	2.0579	7.56e-273	2.53e-270	Auxin-responsive protein SAUR15
Cluster-6558.5065	2.1123	0.013649	0.039312	PREDICTED: two-component response regulator-like APRR7
Cluster-6558.4426	2.1953	2.76e-100	2.61e-98	probable indole-3-acetic acid-amido synthetase GH3.1
Cluster-6558.40951	-1.0252	7.97e-22	1.46e-20	EIN3-binding F-box protein
Cluster-6558.40778	1.01	6.59e-10	5.53e-09	auxin-responsive protein IAA
Cluster-6558.38336	1.2418	2.83e-48	1.18e-46	coronatine-insensitive protein 1
Cluster-6558.38114	1.1306	4.46e-28	1.04e-26	cyclin D3, plant
Cluster-6558.37398	-1.8993	8.54e-12	8.55e-11	auxin response factor
Cluster-6558.33904	-2.4467	2e-08	1.45e-07	serine/threonine-protein kinase CTR1
Cluster-6558.33903	-8.6335	6.72e-13	7.35e-12	serine/threonine-protein kinase CTR1
Cluster-6558.32131	-2.1793	0.0030426	0.010299	ethylene receptor
Cluster-6558.3018	3.042	0.0019787	0.0069531	auxin-responsive protein SAUR32-like
Cluster-6558.29563	1.0571	6.49e-206	1.49e-203	Auxin-induced protein 22D
Cluster-6558.28547	2.0912	5.45e-11	5.1e-10	Auxin-responsive protein SAUR15
Cluster-6558.26183	1.3046	8.22e-33	2.24e-31	basic form of pathogenesis-related protein 1-like, partial
Cluster-6558.20559	1.0503	0.00010998	0.00048607	auxin-induced protein IAA6-like
Cluster-6558.19383	-1.6076	7.71e-97	6.98e-95	two-component response regulator ORR10-like
Cluster-6558.17919	1.1885	1.46e-12	1.55e-11	indole-3-acetic acid-amido synthetase GH3.6
Cluster-6558.12795	1.1164	8.25e-05	0.00037199	auxin-responsive protein SAUR50-like
Cluster-6558.11822	1.394	7.43e-51	3.24e-49	abscisic acid receptor PYL9
Cluster-6558.113	1.8336	1.06e-49	4.52e-48	Auxin-induced protein 6B
Cluster-6558.10917	1.8924	2.49e-58	1.25e-56	auxin-responsive protein SAUR72-like
Cluster-3959.0	3.1257	0.00060042	0.0023356	Pathogenesis-related protein PR-1 type
Cluster-14732.0	1.0151	9.21e-06	4.78e-05	PREDICTED: DELLA protein GAI1
Cluster-13845.0	2.2031	6.17e-30	1.53e-28	Auxin responsive protein, SAUR
Cluster-1251.0	4.2666	0.017487	0.049022	Auxin responsive protein, SAUR
Cluster-12194.0	1.5401	1.38e-09	1.12e-08	transcription factor TGA9-like isoform X2
Pathway	Flavonoid biosynthesis
Metabolite	FC	log2FC	Pvalue	VIP	Up/Down	pos/neg
Hesperetin	3.62101	1.85639	8.57231e-07	1.46744	up	pos
Dihydrokaempferol	2.01746	1.01254	0.00011262	1.35971	up	pos
Galangin	2.34019	1.22662	6.55946e-05	1.4035	up	pos
Pinocembrin	1.72289	0.784834	0.000297534	1.32927	up	pos
Neohesperidin	0.508228	-0.976451	0.00430905	1.17415	down	pos
Taxifolin	2.9366	1.55415	2.40013e-06	1.4624	up	pos
Kaempferol	0.312312	-1.67894	1.29654e-08	1.50422	down	pos
Vitexin	6.56177	2.71409	0.000106955	1.37055	up	pos
Chlorogenic acid	0.267303	-1.90345	6.54176e-06	1.23779	down	neg
Luteolin	0.227301	-2.13733	2.38929e-06	1.29672	down	neg
Naringenin	4.80744	2.26527	1.1687e-10	1.30796	up	neg
Chrysin	3.02206	1.59553	3.86832e-05	1.26863	up	neg
GeneID	log2FoldChange	pval	padj	Gene annotation
Cluster-9046.0	-1.0978	0.00039158	0.0015756	naringenin, 2-oxoglutarate 3-dioxygenase-like
Cluster-6693.0	-1.12	0.0036378	0.012067	vinorine synthase-like
Cluster-6558.9514	-2.2234	2.63e-07	1.67e-06	caffeoyl-CoA O-methyltransferase
Cluster-6558.6103	1.0608	0.0012212	0.004479	anthranilate N-benzoyltransferase protein 2-like
Cluster-6558.4846	-6.8523	5.3e-08	3.65e-07	PREDICTED: flavonoid 3',5'-methyltransferase-like
Cluster-6558.35821	-3.1958	0.0031355	0.010578	polyketide synthase protein
Cluster-6558.35282	1.6307	2.73e-05	0.00013247	flavonoid 3',5'-methyltransferase-like
Cluster-6558.18391	1.2629	1.09e-38	3.51e-37	anthocyanidin reductase ((2S)-flavan-3-ol-forming)-like
Cluster-6558.16264	-5.2112	0.00038745	0.0015603	cytochrome P450 98A2-like
Cluster-6558.12871	-3.2782	3.64e-16	4.95e-15	PREDICTED: chalcone synthase 2-like
Cluster-6558.12870	-2.1508	2.94e-52	1.31e-50	PREDICTED: chalcone synthase 2-like
Cluster-6558.10434	1.1062	6.16e-36	1.84e-34	chalcone synthase
Cluster-1871.0	4.7108	0.0043253	0.014099	Anthranilate N-benzoyltransferase protein 3, HCBT3
Pathway	ABC transporters
Metabolite	FC	log2FC	Pvalue	VIP	Up/Down	pos/neg
Glutathione	2.52306	1.33517	1.87367e-06	1.46826	up	pos
Vitamin B12	1.95678	0.968482	0.0033094	1.22805	up	pos
Biotin	1.67409	0.743378	0.000112796	1.36114	up	pos
1,2-Benzenedicarboxylic acid	8.68547	3.1186	0.000137133	1.42527	up	pos
GeneID	log2FoldChange	pval	padj	Gene annotation
Cluster-6558.41473	-4.84	1.04e-07	6.92e-07	ABC transporter B family member 6-like
Cluster-6558.39438	1.1932	4.64e-19	7.45e-18	ABC transporter C family member 3-like
Cluster-6558.39437	1.8636	3.23e-49	1.37e-47	ABC transporter C family member 3-like
Cluster-6558.31495	1.0035	6.77e-19	1.08e-17	ABC transporter B family member 13-like
Cluster-6558.28539	-1.6421	1.6e-16	2.22e-15	ABC transporter C family member 10-like isoform X2
Cluster-6558.2424	3.31	2e-19	3.27e-18	ABC transporter B family member 11-like
Cluster-6558.21667	-1.8996	2.25e-14	2.73e-13	ABC transporter C family member 13-like
Cluster-6558.21250	1.2963	2.79e-43	1.02e-41	PREDICTED: ABC transporter B family member 2-like
Cluster-6558.19801	1.1385	9.29e-28	2.14e-26	ABC transporter B family member 2-like
Cluster-6558.19404	4.3182	1.42e-24	2.91e-23	ABC transporter B family member 21, ABCB21
Cluster-6558.17233	-1.0672	8.19e-115	9.06e-113	ABC transporter C family member 3-like
Pathway	Glycolysis / Gluconeogenesis
Metabolite	FC	log2FC	Pvalue	VIP	Up/Down	pos/neg
β-D-Fructose 6-phosphate	1.88909	0.91769	4.33445e-07	1.28425	up	neg
Arbutin	0.618814	-0.692422	2.85745e-05	1.27169	down	neg
GeneID	log2FoldChange	pval	padj	Gene annotation
Cluster-6558.27705	-6.4562	1.61e-197	3.5e-195	retrotransposon protein, putative, Ty1-copia sub-class
Cluster-6558.24935	-1.5433	2.82e-180	5.36e-178	hypothetical protein BVRB_2g044760 isoform A
Cluster-6558.10390	1.5107	2.55e-133	3.29e-131	putative glucose-6-phosphate 1-epimerase
Cluster-6558.18891	-1.2504	1.03e-87	8.33e-86	phosphoenolpyruvate carboxykinase (ATP) isoform X1
Cluster-6558.23431	-1.482	5.08e-69	3.12e-67	Phosphoenolpyruvate carboxykinase (ATP) isoform D
Cluster-6558.22745	-1.5936	9.93e-67	5.88e-65	phosphoenolpyruvate carboxykinase (ATP)
Cluster-6558.31389	4.5757	9.42e-38	2.96e-36	glyceraldehyde 3-phosphate dehydrogenase
Cluster-6558.1672	2.4867	4.61e-36	1.39e-34	S-(hydroxymethyl)glutathione dehydrogenase / alcohol dehydrogenase
Cluster-6558.6571	1.2017	1.73e-31	4.53e-30	triosephosphate isomerase (TIM)
Cluster-6558.38828	5.8044	2.5e-30	6.3e-29	enolase-like
Cluster-6558.13654	4.1706	1.19e-25	2.53e-24	PREDICTED: aldehyde dehydrogenase family 2 member B4, mitochondrial
Cluster-6558.18264	11.464	2.85e-22	5.32e-21	fructose-bisphosphate aldolase, class I, ALDO
Cluster-6558.4496	4.3389	5.71e-22	1.05e-20	pyruvate kinase
Cluster-6558.24934	-1.0842	1.03e-13	1.19e-12	multiple inositol polyphosphate phosphatase 1-like isoform X2
Cluster-6558.13989	4.011	3.42e-09	2.68e-08	aldehyde dehydrogenase family 2 member B4, mitochondrial-like isoform X1
Cluster-6558.35038	3.703	8.45e-09	6.36e-08	nuclear transport factor 2-like
Cluster-6558.1594	1.0185	2.15e-08	1.54e-07	aldose 1-epimerase-like
Cluster-969.0	6.5638	2.43e-07	1.55e-06	glyceraldehyde-3-phosphate dehydrogenase, cytosolic
Cluster-6558.31606	2.7159	3.54e-07	2.22e-06	fructose-bisphosphate aldolase 5, cytosolic
Cluster-131.0	6.2974	1.08e-06	6.4e-06	PREDICTED: enolase 1, chloroplastic
Cluster-11706.0	-1.8544	3.11e-05	0.00014976	ATP-dependent 6-phosphofructokinase 2-like
Cluster-6558.40919	5.2628	5.32e-05	0.00024757	glyceraldehyde-3-phosphate dehydrogenase-like
Cluster-6558.13898	1.8792	5.49e-05	0.00025482	fructose-1,6-bisphosphatase I
Cluster-6558.37606	-1.5802	6.27e-05	0.00028856	phosphoglycerate kinase 3, cytosolic
Cluster-6558.14880	2.572	0.00016789	0.00072239	fructose-1,6-bisphosphatase I
Cluster-6558.17579	1.7595	0.00027445	0.0011349	pyruvate kinase
Cluster-6558.35485	1.2254	0.00056745	0.0022175	ATP-dependent 6-phosphofructokinase 3-like
Cluster-1832.0	5.1185	0.00058671	0.0022861	alcohol dehydrogenase (NADP+)
Cluster-6558.28755	1.8559	0.00078069	0.0029721	PREDICTED: aldehyde dehydrogenase family 3 member H1
Cluster-1789.0	4.9945	0.0014342	0.0051908	enolase
Cluster-1141.0	4.3944	0.012473	0.036297	triosephosphate isomerase, cytosolic-like
Cluster-6558.25275	-1.0585	0.012769	0.037089	pyruvate decarboxylase 2
Cluster-6558.14442	2.481	0.014679	0.04194	PREDICTED: pyrophosphate--fructose 6-phosphate 1-phosphotransferase subunit beta
Pathway	Biosynthesis of amino acids
Metabolite	FC	log2FC	Pvalue	VIP	Up/Down	pos/neg
β-D-Fructose 6-phosphate	1.88909	0.91769	4.33445e-07	1.28425	up	neg
S-Sulfo-L-cysteine	3.17646	1.66742	2.77896e-10	1.2995	up	neg
L-Histidine	0.46394	-1.10799	0.00161036	1.08667	down	neg
Citric acid	0.414692	-1.26989	9.62865e-05	1.19764	down	neg
L-Tryptophan	1.50731	0.591974	0.000815835	1.14071	up	neg
GeneID	log2FoldChange	pval	padj	Gene annotation
Cluster-6558.21628	1.1954	2.27e-257	6.88e-255	PREDICTED: arogenate dehydratase/prephenate dehydratase 6, chloroplastic
Cluster-6558.4610	3.2675	3.29e-143	4.53e-141	inositol-phosphate phosphatase / L-galactose 1-phosphate phosphatase / histidinol-phosphatase
Cluster-6558.22666	-1.0074	2.83e-54	1.32e-52	2-isopropylmalate synthase A-like isoform X1
Cluster-6558.21535	-2.0711	4.98e-39	1.63e-37	3-isopropylmalate/(R)-2-methylmalate dehydratase small subunit
Cluster-6558.31389	4.5757	9.42e-38	2.96e-36	glyceraldehyde 3-phosphate dehydrogenase
Cluster-6558.37400	1.1877	3.49e-37	1.08e-35	tryptophan synthase beta chain 1-like
Cluster-6558.7150	4.5428	2.48e-33	6.9e-32	branched-chain-amino-acid aminotransferase 2, chloroplastic-like
Cluster-6558.6571	1.2017	1.73e-31	4.53e-30	triosephosphate isomerase, chloroplastic
Cluster-6558.38828	5.8044	2.5e-30	6.3e-29	enolase-like
Cluster-6558.17959	-5.4939	1.32e-26	2.9e-25	alanine transaminase
Cluster-6558.18264	11.464	2.85e-22	5.32e-21	fructose-bisphosphate aldolase, class I
Cluster-6558.4496	4.3389	5.71e-22	1.05e-20	pyruvate kinase
Cluster-6558.16552	-1.66	1.83e-21	3.3e-20	alanine transaminase
Cluster-6558.32408	-1.3594	8.99e-19	1.42e-17	ketol-acid reductoisomerase
Cluster-6558.25885	-4.0548	6.18e-16	8.29e-15	D-3-phosphoglycerate dehydrogenase
Cluster-6558.18104	1.687	1.5e-14	1.84e-13	L-3-cyanoalanine synthase/ cysteine synthase
Cluster-6558.32403	-3.1205	8.38e-13	9.09e-12	ketol-acid reductoisomerase
Cluster-6558.19433	-4.4402	1.44e-09	1.17e-08	isocitrate dehydrogenase (NAD+)
Cluster-6558.16440	-3.004	1.66e-09	1.34e-08	2-isopropylmalate synthase
Cluster-6558.23844	-7.3146	3.2e-09	2.51e-08	2-isopropylmalate synthase A-like isoform X1
Cluster-7587.0	2.766	3.95e-09	3.07e-08	inositol-phosphate phosphatase / L-galactose 1-phosphate phosphatase / histidinol-phosphatase
Cluster-1069.0	7.1658	6.93e-09	5.27e-08	ketol-acid reductoisomerase, mitochondrial-like
Cluster-6558.35038	3.703	8.45e-09	6.36e-08	nuclear transport factor 2-like
Cluster-6558.15265	-1.1544	1.38e-08	1.01e-07	probable low-specificity L-threonine aldolase 1 isoform X2
Cluster-6558.28664	1.6703	1.62e-08	1.18e-07	arogenate/prephenate dehydratase
Cluster-6558.24902	-1.5487	2.17e-08	1.56e-07	D-3-phosphoglycerate dehydrogenase
Cluster-6558.26884	-6.8699	5.11e-08	3.52e-07	2-isopropylmalate synthase A-like isoform X2
Cluster-6558.23845	-6.6395	5.86e-08	4.01e-07	Alpha-isopropylmalate synthase/homocitrate synthase
Cluster-969.0	6.5638	2.43e-07	1.55e-06	glyceraldehyde-3-phosphate dehydrogenase, cytosolic
Cluster-6558.31606	2.7159	3.54e-07	2.22e-06	fructose-bisphosphate aldolase 5, cytosolic
Cluster-131.0	6.2974	1.08e-06	6.4e-06	PREDICTED: enolase 1, chloroplastic
Cluster-6558.9760	-6.1654	2.51e-06	1.41e-05	PREDICTED: phospho-2-dehydro-3-deoxyheptonate aldolase 2, chloroplastic
Cluster-6558.26355	-5.6779	7.27e-06	3.84e-05	isocitrate dehydrogenase (NAD+)
Cluster-6558.29960	1.6379	1.07e-05	5.53e-05	PREDICTED: cysteine synthase isoform X1
Cluster-6558.4117	3.1224	2.38e-05	0.00011672	aminoacylase-1-like isoform X2
Cluster-11706.0	-1.8544	3.11e-05	0.00014976	ATP-dependent 6-phosphofructokinase 2-like
Cluster-133.0	5.6642	3.35e-05	0.00016078	homocitrate synthase, mitochondrial-like
Cluster-6558.40919	5.2628	5.32e-05	0.00024757	glyceraldehyde-3-phosphate dehydrogenase-like
Cluster-6558.37606	-1.5802	6.27e-05	0.00028856	phosphoglycerate kinase 3, cytosolic
Cluster-1394.0	5.5081	0.00011707	0.0005155	3-isopropylmalate dehydrogenase
Cluster-6558.24214	-1	0.00014194	0.00061659	S-adenosylmethionine synthetase
Cluster-1414.0	5.3713	0.00026401	0.001095	homocitrate synthase, mitochondrial-like
Cluster-6558.3978	5.2617	0.00026484	0.001098	diaminopimelate decarboxylase 2, chloroplastic-like
Cluster-6558.17579	1.7595	0.00027445	0.0011349	pyruvate kinase
Cluster-6558.10744	1.1749	0.00055423	0.0021689	ketol-acid reductoisomerase, chloroplastic
Cluster-6558.28325	-1.1042	0.00055782	0.0021818	aspartate aminotransferase, cytoplasmic-like
Cluster-6558.35485	1.2254	0.00056745	0.0022175	ATP-dependent 6-phosphofructokinase 3-like
Cluster-6558.16832	1.5548	0.0014331	0.005188	glutamate synthase [NADH], amyloplastic-like isoform X3
Cluster-1789.0	4.9945	0.0014342	0.0051908	enolase
Cluster-6558.34340	-4.5943	0.0062182	0.019532	tyrosine aminotransferase
Cluster-1034.0	4.6028	0.006463	0.020226	probable aspartate-semialdehyde dehydrogenase
Cluster-1141.0	4.3944	0.012473	0.036297	triosephosphate isomerase, cytosolic-like
Pathway	Isoquinoline alkaloid biosynthesis
Metabolite	FC	log2FC	Pvalue	VIP	Up/Down	pos/neg
Sinoacutine	0.26415	-1.92057	8.34962e-08	1.4967	down	pos
L-Dopa	0.390676	-1.35596	7.34571e-06	1.46149	down	pos
Tyramine	0.405983	-1.30051	2.03601e-06	1.45759	down	pos
3,4-Dihydroxybenzaldehyde	0.373887	-1.41932	1.84514e-05	1.4254	down	pos
Stylopine	0.207257	-2.27051	4.81895e-07	1.29846	down	neg
Sanguinarine	0.391349	-1.35347	7.59072e-05	1.22723	down	neg
Levodopa	0.495557	-1.01288	1.22323e-06	1.26201	down	neg
GeneID	log2FoldChange	pval	padj	Gene annotation
Cluster-6558.17639	1.4047	1.19e-134	1.56e-132	primary amine oxidase-like
Cluster-6558.18679	1.3708	1.11e-46	4.43e-45	PREDICTED: uncharacterized protein LOC104897280
Cluster-6558.27531	1.4229	4.38e-26	9.5e-25	PREDICTED: tyrosine decarboxylase 1 isoform X1
Cluster-6558.15747	2.0509	1.85e-18	2.88e-17	tyrosine decarboxylase 1 isoform X2
Cluster-1015.0	8.3294	5.13e-12	5.22e-11	polyphenol oxidase
Cluster-6558.15749	1.1782	6.8e-11	6.3e-10	tyrosine decarboxylase 1 isoform X1
Cluster-6558.26148	1.1922	1.25e-09	1.02e-08	primary amine oxidase-like
Cluster-6558.23587	-1.1454	3.68e-09	2.87e-08	primary amine oxidase-like
Cluster-6558.28325	-1.1042	0.00055782	0.0021818	aspartate aminotransferase, cytoplasmic-like
Cluster-6558.34340	-4.5943	0.0062182	0.019532	tyrosine aminotransferase
Pathway	Tyrosine metabolism
Metabolite	FC	log2FC	Pvalue	VIP	Up/Down	pos/neg
L-Dopa	0.390676	-1.35596	7.34571e-06	1.46149	down	pos
Rosmarinic acid	2.21883	1.1498	1.93209e-05	1.4088	up	pos
Tyramine	0.405983	-1.30051	2.03601e-06	1.45759	down	pos
Salidroside	2.04703	1.03353	3.57009e-05	1.2058	up	neg
Levodopa	0.495557	-1.01288	1.22323e-06	1.26201	down	neg
GeneID	log2FoldChange	pval	padj	Gene annotation
Cluster-6558.17639	1.4047	1.19e-134	1.56e-132	primary-amine oxidase
Cluster-6558.18679	1.3708	1.11e-46	4.43e-45	primary-amine oxidase
Cluster-6558.19002	-1.4271	1.85e-42	6.67e-41	maleylacetoacetate isomerase
Cluster-6558.1672	2.4867	4.61e-36	1.39e-34	S-(hydroxymethyl)glutathione dehydrogenase / alcohol dehydrogenase
Cluster-6558.27531	1.4229	4.38e-26	9.5e-25	tyrosine decarboxylase
Cluster-6558.15747	2.0509	1.85e-18	2.88e-17	tyrosine decarboxylase
Cluster-1015.0	8.3294	5.13e-12	5.22e-11	polyphenol oxidase
Cluster-6558.15749	1.1782	6.8e-11	6.3e-10	tyrosine decarboxylase
Cluster-6558.26148	1.1922	1.25e-09	1.02e-08	primary-amine oxidase
Cluster-6558.23587	-1.1454	3.68e-09	2.87e-08	primary-amine oxidase
Cluster-6558.28325	-1.1042	0.00055782	0.0021818	aspartate aminotransferase, cytoplasmic
Cluster-6558.17986	-4.9903	0.0010356	0.0038523	maleylacetoacetate isomerase
Cluster-6558.34340	-4.5943	0.0062182	0.019532	tyrosine aminotransferase
Pathway	Phenylalanine metabolism
Metabolite	FC	log2FC	Pvalue	VIP	Up/Down	pos/neg
Salicylic acid	2.57581	1.36503	7.24957e-08	1.48874	up	pos
Pseudoephedrine	16.7863	4.06922	1.93201e-11	1.51976	up	pos
Benzoic Acid	1.75742	0.813455	3.40189e-05	1.40572	up	pos
Phenylglyoxylic acid	4.15589	2.05516	1.35057e-07	1.49463	up	pos
trans-Cinnamic acid	0.576522	-0.794552	1.25249e-08	1.29187	down	neg
Phenylacetaldehyde	2.03686	1.02634	1.99031e-08	1.29794	up	neg
GeneID	log2FoldChange	pval	padj	Gene annotation
Cluster-6558.17639	1.4047	1.19e-134	1.56e-132	primary-amine oxidase
Cluster-6558.18679	1.3708	1.11e-46	4.43e-45	primary-amine oxidase
Cluster-6558.11894	1.1823	1.04e-41	3.65e-40	4-coumarate--CoA ligase
Cluster-6558.26148	1.1922	1.25e-09	1.02e-08	primary-amine oxidase
Cluster-6558.23587	-1.1454	3.68e-09	2.87e-08	primary-amine oxidase
Cluster-6558.4846	-6.8523	5.3e-08	3.65e-07	caffeoyl-CoA O-methyltransferase
Cluster-6558.35282	1.6307	2.73e-05	0.00013247	caffeoyl-CoA O-methyltransferase
Cluster-6558.28325	-1.1042	0.00055782	0.0021818	aspartate aminotransferase, cytoplasmic
Cluster-6558.15045	-1.2829	0.0061831	0.019432	amidase
Cluster-6558.34340	-4.5943	0.0062182	0.019532	tyrosine aminotransferase
Pathway	Carbon metabolism
Metabolite	FC	log2FC	Pvalue	VIP	Up/Down	pos/neg
O-Phospho-L-serine	2.95947	1.56534	1.41247e-05	1.42276	up	pos
β-D-Fructose 6-phosphate	1.88909	0.91769	4.33445e-07	1.28425	up	neg
Citric acid	0.414692	-1.26989	9.62865e-05	1.19764	down	neg
GeneID	log2FoldChange	pval	padj	Gene annotation
Cluster-6558.22508	1.1952	0	0	phosphoenolpyruvate carboxylase
Cluster-6558.28270	1.6298	4.38e-288	1.55e-285	acetyl-CoA C-acetyltransferase
Cluster-6558.19068	-1.4387	1.29e-214	3.19e-212	3-hydroxyisobutyryl-CoA hydrolase
Cluster-6558.27705	-6.4562	1.61e-197	3.5e-195	pyruvate dehydrogenase E2 component (dihydrolipoamide acetyltransferase)
Cluster-6558.17039	-5.3337	2.73e-106	2.76e-104	malate dehydrogenase
Cluster-6558.18891	-1.2504	1.03e-87	8.33e-86	phosphoenolpyruvate carboxykinase (ATP)
Cluster-6558.23431	-1.482	5.08e-69	3.12e-67	phosphoenolpyruvate carboxykinase (ATP)
Cluster-6558.22745	-1.5936	9.93e-67	5.88e-65	phosphoenolpyruvate carboxykinase (ATP)
Cluster-6558.17840	-4.1721	8e-57	3.91e-55	3-hydroxyisobutyryl-CoA hydrolase
Cluster-6558.11536	-1.2999	3.1e-38	9.84e-37	(S)-2-hydroxy-acid oxidase
Cluster-6558.31389	4.5757	9.42e-38	2.96e-36	glyceraldehyde 3-phosphate dehydrogenase
Cluster-6558.1672	2.4867	4.61e-36	1.39e-34	S-(hydroxymethyl)glutathione dehydrogenase / alcohol dehydrogenase
Cluster-6558.26046	2.31	6.72e-32	1.78e-30	malate dehydrogenase (oxaloacetate-decarboxylating)(NADP+)
Cluster-6558.6571	1.2017	1.73e-31	4.53e-30	triosephosphate isomerase (TIM)
Cluster-6558.35016	-1.1688	1.25e-30	3.2e-29	phosphoenolpyruvate carboxylase
Cluster-6558.38828	5.8044	2.5e-30	6.3e-29	enolase
Cluster-6558.17959	-5.4939	1.32e-26	2.9e-25	alanine transaminase
Cluster-6558.18264	11.464	2.85e-22	5.32e-21	fructose-bisphosphate aldolase, class I
Cluster-6558.4496	4.3389	5.71e-22	1.05e-20	pyruvate kinase
Cluster-6558.16552	-1.66	1.83e-21	3.3e-20	alanine transaminase
Cluster-6558.211	1.1494	1.58e-20	2.74e-19	formamidase
Cluster-6558.25458	-10.132	1.04e-17	1.54e-16	sedoheptulose-bisphosphatase
Cluster-6558.12337	-5.5652	4.9e-16	6.61e-15	3-hydroxyisobutyryl-CoA hydrolase
Cluster-6558.25885	-4.0548	6.18e-16	8.29e-15	D-3-phosphoglycerate dehydrogenase
Cluster-6558.18104	1.687	1.5e-14	1.84e-13	L-3-cyanoalanine synthase/ cysteine synthase
Cluster-6558.5057	-3.8343	7.6e-13	8.27e-12	malate dehydrogenase (oxaloacetate-decarboxylating)(NADP+)
Cluster-6558.37520	4.5758	2.87e-12	2.98e-11	glucose-6-phosphate 1-dehydrogenase
Cluster-6558.17841	-7.2705	2.92e-12	3.03e-11	3-hydroxyisobutyryl-CoA hydrolase
Cluster-6558.26951	-7.208	4.1e-12	4.22e-11	phosphoenolpyruvate carboxylase
Cluster-6558.16048	2.4277	4.14e-12	4.26e-11	phosphoenolpyruvate carboxylase
Cluster-6558.11295	8.2055	1.3e-11	1.28e-10	phosphoenolpyruvate carboxylase
Cluster-6558.19433	-4.4402	1.44e-09	1.17e-08	isocitrate dehydrogenase (NAD+)
Cluster-6558.35038	3.703	8.45e-09	6.36e-08	6-phosphofructokinase 1
Cluster-6558.5081	1.0891	8.7e-09	6.54e-08	6-phosphogluconolactonase
Cluster-6558.35218	2.704	1.09e-08	8.09e-08	acetyl-CoA C-acetyltransferase
Cluster-6558.42123	7.0014	1.9e-08	1.37e-07	formate dehydrogenase
Cluster-6558.24902	-1.5487	2.17e-08	1.56e-07	D-3-phosphoglycerate dehydrogenase
Cluster-1567.1	6.6377	1.52e-07	9.93e-07	triose/dihydroxyacetone kinase / FAD-AMP lyase (cyclizing)
Cluster-969.0	6.5638	2.43e-07	1.55e-06	glyceraldehyde 3-phosphate dehydrogenase
Cluster-6558.31606	2.7159	3.54e-07	2.22e-06	fructose-bisphosphate aldolase, class I
Cluster-131.0	6.2974	1.08e-06	6.4e-06	enolase
Cluster-378.0	6.2946	1.29e-06	7.58e-06	2-oxoglutarate dehydrogenase E1 component
Cluster-6558.24923	1.0711	1.43e-06	8.32e-06	catalase
Cluster-6558.29303	1.4918	4.58e-06	2.49e-05	malate dehydrogenase (oxaloacetate-decarboxylating)(NADP+)
Cluster-6558.26355	-5.6779	7.27e-06	3.84e-05	isocitrate dehydrogenase (NAD+)
Cluster-6558.29960	1.6379	1.07e-05	5.53e-05	cysteine synthase A
Cluster-11706.0	-1.8544	3.11e-05	0.00014976	6-phosphofructokinase 1
Cluster-6558.40919	5.2628	5.32e-05	0.00024757	glyceraldehyde 3-phosphate dehydrogenase
Cluster-6558.13898	1.8792	5.49e-05	0.00025482	fructose-1,6-bisphosphatase I
Cluster-6558.37606	-1.5802	6.27e-05	0.00028856	phosphoglycerate kinase
Cluster-6558.20857	-5.4755	0.00010201	0.00045337	6-phosphogluconolactonase
Cluster-6558.14880	2.572	0.00016789	0.00072239	fructose-1,6-bisphosphatase I
Cluster-6558.17579	1.7595	0.00027445	0.0011349	pyruvate kinase
Cluster-6558.28325	-1.1042	0.00055782	0.0021818	aspartate aminotransferase, cytoplasmic
Cluster-6558.35485	1.2254	0.00056745	0.0022175	6-phosphofructokinase 1
Cluster-1503.0	4.8978	0.0013786	0.0050104	malate dehydrogenase
Cluster-1789.0	4.9945	0.0014342	0.0051908	enolase
Cluster-6558.38978	4.8846	0.0016313	0.0058353	glycine dehydrogenase
Cluster-6558.28557	-1.5069	0.0016703	0.0059596	6-phosphogluconolactonase
Cluster-6558.31791	1.0538	0.0032177	0.010822	malate dehydrogenase
Cluster-1867.1	4.5223	0.0081168	0.024816	6-phosphogluconate dehydrogenase
Cluster-6558.39552	4.4978	0.0093997	0.028245	triose/dihydroxyacetone kinase / FAD-AMP lyase (cyclizing)
Cluster-6558.39643	1.4077	0.012376	0.036064	glycine dehydrogenase
Cluster-1141.0	4.3944	0.012473	0.036297	triosephosphate isomerase (TIM)
Cluster-6558.25440	1.5282	0.01279	0.037145	3-hydroxyisobutyryl-CoA hydrolase
Pathway	Phenylpropanoid biosynthesis
Metabolite	FC	log2FC	Pvalue	VIP	Up/Down	pos/neg
Chlorogenic acid	0.267303	-1.90345	6.54176e-06	1.23779	down	neg
trans-Cinnamic acid	0.576522	-0.794552	1.25249e-08	1.29187	down	neg
Coniferyl alcohol	0.466774	-1.0992	7.76587e-07	1.30119	down	neg
GeneID	log2FoldChange	pval	padj	Gene annotation
Cluster-6558.18471	-1.0927	1.6e-147	2.32e-145	cinnamyl-alcohol dehydrogenase
Cluster-6558.4575	1.6231	1.01e-146	1.46e-144	peroxidase
Cluster-6558.18470	-1.15	2.87e-70	1.82e-68	cinnamyl-alcohol dehydrogenase
Cluster-6558.32840	1.1539	3.93e-54	1.83e-52	peroxidase
Cluster-6558.39725	2.7395	2.65e-50	1.14e-48	caffeic acid 3-O-methyltransferase
Cluster-6558.11894	1.1823	1.04e-41	3.65e-40	4-coumarate--CoA ligase
Cluster-6558.8759	-1.0944	1.52e-34	4.33e-33	beta-glucosidase
Cluster-6558.6830	1.0718	3.71e-33	1.02e-31	ferulate-5-hydroxylase
Cluster-6558.11559	4.8785	3.75e-27	8.42e-26	peroxidase
Cluster-9681.0	2.1597	1.27e-25	2.7e-24	peroxidase
Cluster-4856.0	1.4161	2.95e-20	5.03e-19	peroxidase
Cluster-6558.33703	-1.8636	2.81e-17	4.08e-16	beta-glucosidase
Cluster-5339.0	-1.7114	1.34e-13	1.54e-12	coniferyl-alcohol glucosyltransferase
Cluster-7248.0	2.0378	6.08e-11	5.67e-10	peroxidase
Cluster-6558.6308	1.2581	2.43e-09	1.93e-08	beta-glucosidase
Cluster-6558.40552	1.5365	7.23e-09	5.48e-08	caffeic acid 3-O-methyltransferase
Cluster-6558.4005	2.678	5.23e-08	3.6e-07	peroxidase
Cluster-6558.4846	-6.8523	5.3e-08	3.65e-07	caffeoyl-CoA O-methyltransferase
Cluster-10908.0	-3.1804	1.41e-07	9.27e-07	caffeic acid 3-O-methyltransferase
Cluster-15506.0	2.4006	2.53e-07	1.61e-06	peroxidase
Cluster-6558.1506	1.6457	3.03e-07	1.91e-06	peroxidase
Cluster-6558.17236	-4.4547	2.05e-06	1.17e-05	beta-glucosidase
Cluster-6558.4019	1.1795	3.17e-06	1.76e-05	beta-glucosidase
Cluster-15379.0	2.242	1.06e-05	5.45e-05	peroxidase
Cluster-6558.35282	1.6307	2.73e-05	0.00013247	caffeoyl-CoA O-methyltransferase
Cluster-6558.34440	1.4447	3.86e-05	0.0001835	beta-glucosidase
Cluster-6558.18181	1.0706	0.00011988	0.00052695	beta-glucosidase
Cluster-15214.0	2.3028	0.00024944	0.0010398	peroxidase
Cluster-6558.16264	-5.2112	0.00038745	0.0015603	coumaroylquinate(coumaroylshikimate) 3'-monooxygenase
Cluster-12973.0	-2.2069	0.00075632	0.0028889	peroxidase
Cluster-6558.10254	2.306	0.00079552	0.0030236	caffeic acid 3-O-methyltransferase
Cluster-14192.0	2.0476	0.0011811	0.0043454	peroxidase
Cluster-6558.6103	1.0608	0.0012212	0.004479	shikimate O-hydroxycinnamoyltransferase
Cluster-2881.0	4.8138	0.002079	0.007274	caffeic acid 3-O-methyltransferase
Cluster-6558.31651	1.2273	0.0029422	0.0099836	caffeic acid 3-O-methyltransferase
Cluster-6693.0	-1.12	0.0036378	0.012067	shikimate O-hydroxycinnamoyltransferase
Cluster-6558.30809	1.2913	0.0039951	0.013126	beta-glucosidase
Cluster-1871.0	4.7108	0.0043253	0.014099	shikimate O-hydroxycinnamoyltransferase
Cluster-8595.0	-1.3933	0.0044493	0.014462	peroxidase
Pathway	2-Oxocarboxylic acid metabolism
Metabolite	FC	log2FC	Pvalue	VIP	Up/Down	pos/neg
Citric acid	0.414692	-1.26989	9.62865e-05	1.19764	down	neg
L-Tryptophan	1.50731	0.591974	0.000815835	1.14071	up	neg
GeneID	log2FoldChange	pval	padj	Gene annotation
Cluster-6558.32159	-2.2571	0	0	N-hydroxythioamide S-beta-glucosyltransferase
Cluster-6558.22666	-1.0074	2.83e-54	1.32e-52	2-isopropylmalate synthase
Cluster-6558.21535	-2.0711	4.98e-39	1.63e-37	3-isopropylmalate/(R)-2-methylmalate dehydratase small subunit
Cluster-6558.7150	4.5428	2.48e-33	6.9e-32	branched-chain amino acid aminotransferase
Cluster-6558.17959	-5.4939	1.32e-26	2.9e-25	alanine transaminase
Cluster-6558.16552	-1.66	1.83e-21	3.3e-20	alanine transaminase
Cluster-6558.32408	-1.3594	8.99e-19	1.42e-17	ketol-acid reductoisomerase
Cluster-6558.32403	-3.1205	8.38e-13	9.09e-12	ketol-acid reductoisomerase
Cluster-6558.19433	-4.4402	1.44e-09	1.17e-08	isocitrate dehydrogenase (NAD+)
Cluster-6558.16440	-3.004	1.66e-09	1.34e-08	2-isopropylmalate synthase
Cluster-6558.23844	-7.3146	3.2e-09	2.51e-08	2-isopropylmalate synthase
Cluster-1069.0	7.1658	6.93e-09	5.27e-08	ketol-acid reductoisomerase
Cluster-6558.26884	-6.8699	5.11e-08	3.52e-07	2-isopropylmalate synthase
Cluster-6558.23845	-6.6395	5.86e-08	4.01e-07	2-isopropylmalate synthase
Cluster-6558.26355	-5.6779	7.27e-06	3.84e-05	isocitrate dehydrogenase (NAD+)
Cluster-6558.4117	3.1224	2.38e-05	0.00011672	aminoacylase
Cluster-133.0	5.6642	3.35e-05	0.00016078	2-isopropylmalate synthase
Cluster-1394.0	5.5081	0.00011707	0.0005155	3-isopropylmalate dehydrogenase
Cluster-1414.0	5.3713	0.00026401	0.001095	2-isopropylmalate synthase
Cluster-6558.10744	1.1749	0.00055423	0.0021689	ketol-acid reductoisomerase
Cluster-6558.28325	-1.1042	0.00055782	0.0021818	aspartate aminotransferase, cytoplasmic
Cluster-1034.0	4.6028	0.006463	0.020226	aspartate-semialdehyde dehydrogenase

## Sheet: Genes related to physiology
Genes related to the regulation of physiological indicators in H. ammodendron
Plant hormone related genes
GeneID	log2FoldChange	pval	padj	Gene annotation
Cluster-6558.11744	-1.0497	4.13e-09	3.21e-08	PREDICTED: abscisic acid 8'-hydroxylase 4
Cluster-6558.3737	1.8282	1.06e-184	2.1e-182	PREDICTED: abscisic acid 8'-hydroxylase 1-like
Cluster-6558.20012	1.0321	1.69e-35	4.99e-34	9-cis-epoxycarotenoid dioxygenase
Cluster-6558.42133	2.211	7.91e-33	2.15e-31	9-cis-epoxycarotenoid dioxygenase
Cluster-6558.11822	1.394	7.43e-51	3.24e-49	abscisic acid receptor PYL9
Cluster-6558.27666	-1.7874	2.2e-08	1.58e-07	PREDICTED: Probable E3 ubiquitin-protein ligase
Cluster-6558.27665	-2.5547	1.48e-05	7.48e-05	PREDICTED: Probable E3 ubiquitin-protein ligase
Cluster-6558.30946	-1.1369	0.00016083	0.00069361	PREDICTED: Probable E3 ubiquitin-protein ligase
Cluster-6558.11990	-2.395	1.64e-06	9.44e-06	Probable E3 ubiquitin-protein ligase
Cluster-6558.27478	-1.7318	3.44e-05	0.00016486	Probable E3 ubiquitin-protein ligase
Cluster-6558.20219	-1.4904	0	0	Probable protein phosphatase 2C 22
Cluster-6558.26365	-2.0098	1.41e-31	3.68e-30	Probable protein phosphatase 2C 51
Cluster-6558.10942	-1.1427	9.98e-18	1.48e-16	Probable protein phosphatase 2C 27
Cluster-6558.21438	-1.4774	1.22e-13	1.41e-12	Probable protein phosphatase 2C 51
Cluster-6558.27642	1.139	1.84e-66	1.08e-64	auxin efflux carrier component 3-like isoform X1
Cluster-6558.10917	1.8924	2.49e-58	1.25e-56	auxin-responsive protein SAUR72-like
Cluster-6558.29959	2.9278	2.33e-56	1.13e-54	auxin-induced protein PCNT115-like isoform X1
Cluster-6558.13040	1.263	6.29e-39	2.05e-37	auxin-binding protein ABP19a-like
Cluster-13845.0	2.2031	6.17e-30	1.53e-28	auxin-responsive protein SAUR36-like
Cluster-6558.40508	2.488	2.69e-24	5.46e-23	auxin-responsive protein SAUR41-like
Cluster-6558.39270	3.4591	3.96e-23	7.65e-22	PREDICTED: auxin-binding protein ABP19a
Cluster-6558.14890	-1.1965	6.68e-17	9.49e-16	auxin-responsive protein SAUR71-like
Cluster-9600.0	-1.2124	4.9e-15	6.21e-14	PREDICTED: auxin-responsive protein
Cluster-6558.37398	-1.8993	8.54e-12	8.55e-11	auxin response factor 11
Cluster-2109.0	3.5788	4.45e-05	0.00020945	auxin-binding protein ABP19a-like
Cluster-6558.12795	1.1164	8.25e-05	0.00037199	auxin-responsive protein SAUR50-like
Cluster-6558.20559	1.0503	0.00010998	0.00048607	auxin-induced protein IAA6-like
Cluster-6726.0	2.9238	0.0004682	0.0018588	auxin-responsive protein SAUR68-like
Cluster-10294.0	2.2853	0.0015389	0.0055375	PREDICTED: auxin-responsive protein SAUR71
Cluster-6558.3018	3.042	0.0019787	0.0069531	auxin-responsive protein SAUR32-like
Cluster-6558.29563	1.0571	6.49e-206	1.49e-203	PREDICTED: auxin-responsive protein SAUR32-like
Cluster-6558.113	1.8336	1.06e-49	4.52e-48	PREDICTED: auxin-induced protein 22D-like
Cluster-6558.28548	1.6626	6.89e-32	1.82e-30	PREDICTED: auxin-induced protein 10A5-like
Cluster-6558.28547	2.0912	5.45e-11	5.1e-10	PREDICTED:auxin-responsive protein SAUR22-like
Cluster-9618.0	2.7788	0.0055215	0.017553	PREDICTED: auxin-responsive protein SAUR23-like
Cluster-6558.4426	2.1953	2.76e-100	2.61e-98	PREDICTED: auxin-induced protein X15
Cluster-6558.17919	1.1885	1.46e-12	1.55e-11	auxin responsive GH3 gene family
Cluster-6558.40778	1.01	6.59e-10	5.53e-09	auxin responsive GH3 gene family
Cluster-6558.7722	2.0579	7.56e-273	2.53e-270	auxin-responsive protein IAA
Cluster-6558.2930	4.9388	1.14e-16	1.59e-15	auxin-responsive protein SAUR15
Cluster-1251.0	4.2666	0.017487	0.049022	auxin-binding protein ABP19a
Cluster-6558.23	1.1005	0.017708	0.049557	auxin-induced protein X15
Cluster-6558.12374	4.0239	2.89e-15	3.73e-14	auxin-responsive protein
Cluster-6558.32766	3.1169	1.02e-12	1.1e-11	auxin response factor
Cluster-6558.12311	1.8552	2.16e-63	1.2e-61	PREDICTED: gibberellin-regulated protein 14
Cluster-6558.20462	-1.2651	6.84e-23	1.31e-21	gibberellin 2-beta-dioxygenase-like
Cluster-6558.29991	-1.8526	1.7e-15	2.22e-14	gibberellin 2-beta-dioxygenase 8-like isoform X1
Cluster-6558.7768	1.368	1.37e-09	1.12e-08	gibberellin 20 oxidase 2-like
Cluster-6558.1482	3.2718	5.96e-05	0.00027498	gibberellin-regulated protein 6-like
Cluster-6558.2509	1.0497	8.19e-05	0.0003695	gibberellin-regulated protein 4-like
Cluster-13783.0	4.971	0.0010415	0.0038728	gibberellin-regulated protein 6-like
Cluster-3168.0	3.5542	0.0052346	0.016741	PREDICTED: gibberellin-regulated protein 12-like
Cluster-8613.0	1.008	0.0071615	0.022221	gibberellin 20 oxidase 1-like isoform X2
Peroxisome related genes
GeneID	log2FoldChange	pval	padj	Gene annotation
Cluster-6558.8230	-1.2457	2.77e-14	3.35e-13	Superoxide dismutase [Cu-Zn]-like
Cluster-1348.0	4.6028	0.006463	0.020226	Superoxide dismutase [Cu-Zn]
Cluster-5663.0	-4.7749	2.22e-05	0.00010927	PREDICTED: Superoxide dismutase [Cu-Zn], chloroplastic-like
Cluster-6558.38700	6.8697	5.18e-08	3.57e-07	Iron/manganese Superoxide dismutases, alpha-hairpin domain
Cluster-6558.4575	1.6231	1.01e-146	1.46e-144	PREDICTED: Peroxidase 72
Cluster-6558.2577	2.1842	2.02e-69	1.25e-67	Peroxidase 3-like
Cluster-6558.32840	1.1539	3.93e-54	1.83e-52	PREDICTED: Peroxidase 50
Cluster-9681.0	2.1597	1.27e-25	2.7e-24	Peroxidase 11-like
Cluster-7248.0	2.0378	6.08e-11	5.67e-10	Peroxidase 64-like
Cluster-6558.4005	2.678	5.23e-08	3.6e-07	Peroxidase 19-like
Cluster-15506.0	2.4006	2.53e-07	1.61e-06	Peroxidase 9
Cluster-6558.1506	1.6457	3.03e-07	1.91e-06	Peroxidase 5-like
Cluster-15379.0	2.242	1.06e-05	5.45e-05	PREDICTED: Peroxidase 25
Cluster-6558.28351	1.1959	1.98e-05	9.82e-05	L-ascorbate Peroxidase 5, peroxisomal-like
Cluster-620.0	5.3332	0.0002041	0.00086525	glutathione Peroxidase-like peroxiredoxin gpx1
Cluster-15214.0	2.3028	0.00024944	0.0010398	Peroxidase 72-like
Cluster-14192.0	2.0476	0.0011811	0.0043454	PREDICTED: Peroxidase 20
Cluster-8244.0	1.9103	0.0051767	0.016584	cytosolic ascorbate Peroxidase
Cluster-6558.1750	1.1103	3.19e-32	8.49e-31	PREDICTED: Spinacia oleracea L-ascorbate Peroxidase 3-like
Cluster-6558.11559	4.8785	3.75e-27	8.42e-26	PREDICTED: Peroxidase 12-like
Cluster-4856.0	1.4161	2.95e-20	5.03e-19	PREDICTED: Peroxidase P7-like
Cluster-6558.3202	5.593	1.9e-10	1.68e-09	PREDICTED: L-ascorbate Peroxidase, cytosolic
Cluster-6558.3657	6.6645	1.33e-07	8.77e-07	PREDICTED: Peroxidase P7-like
Cluster-6558.29660	1.5674	0.00010455	0.0004638	PREDICTED: putative L-ascorbate Peroxidase 6
Cluster-1770.0	5.3963	0.00013033	0.00056945	glutathione Peroxidase
Cluster-8262.0	1.831	0.001034	0.0038472	L-ascorbate Peroxidase
Cluster-896.0	5.0574	0.0013437	0.0048918	Dyp-type Peroxidase family
Cluster-6558.31865	1.0579	0.0035209	0.011729	Peroxidase activity
Proline related genes
GeneID	log2FoldChange	pval	padj	Gene annotation
Cluster-6558.550	3.9672	2.26e-156	3.59e-154	PREDICTED: proline-rich receptor-like protein kinase PERK15
Cluster-6558.39334	2.6261	2.98e-106	3e-104	PREDICTED: 36.4 kDa proline-rich protein
Cluster-6558.30563	-2.0289	1.55e-30	3.92e-29	hydroxyproline O-galactosyltransferase HPGT1-like
Cluster-6558.18107	6.4886	6.17e-10	5.19e-09	large proline-rich protein BAG6-like isoform X2
Cluster-6558.5987	-1.0589	1.52e-09	1.23e-08	PREDICTED: proline-rich receptor-like protein kinase PERK8
Cluster-6558.16811	-1.2602	1.42e-07	9.3e-07	betaine/proline transporter
Cluster-6558.3205	2.0316	5.66e-07	3.46e-06	PREDICTED: proline-rich protein 36-like
Cluster-14150.0	-6.044	5.45e-06	2.92e-05	large proline-rich protein BAG6-like isoform X2
Cluster-6558.27842	-1.2705	2.14e-18	3.31e-17	PREDICTED: large proline-rich protein BAG6
Cluster-6558.5111	-1.5802	1.66e-12	1.76e-11	PREDICTED: proline-rich receptor-like protein kinase PERK1
Cluster-6558.9527	-2.7111	0.0005828	0.0022721	Hydroxyproline O-galactosyltransferase GALT5
Cluster-6558.1215	2.4018	5.83e-30	1.45e-28	36.4 kDa proline-rich protein
Cluster-6558.33473	1.063	1.46e-27	3.33e-26	Putative proline-rich receptor-like protein kinase PERK11
Cluster-6558.29942	-2.1662	2.12e-15	2.75e-14	proline transporter 2
Cluster-6558.20930	-1.5624	0	0	Hydroxyproline O-galactosyltransferase GALT5
Cluster-6558.22738	-2.4432	0	0	36.4 kDa proline-rich protein
Cluster-6558.2435	-4.8932	2.94e-145	4.14e-143	Putative proline-rich receptor-like protein kinase PERK11
Cluster-6558.17062	-1.1671	2.3e-88	1.89e-86	proline transporter 2
Cluster-6558.24882	3.1835	5.32e-80	3.85e-78	proline-rich AKT1 substrate 1
Cluster-6558.28776	-1.298	2.24e-54	1.04e-52	AdoMet dependent proline di-methyltransferase
Cluster-6558.39725	2.7395	2.65e-50	1.14e-48	AdoMet dependent proline di-methyltransferase
Cluster-6558.20194	-9.0446	3.94e-27	8.82e-26	proline rich region
Cluster-6558.14579	-7.919	7.15e-11	6.6e-10	proline rich region
Cluster-10908.0	-3.1804	1.41e-07	9.27e-07	AdoMet dependent proline di-methyltransferase
Cluster-6558.39033	4.3066	1.62e-07	1.05e-06	proline rich region
Cluster-6558.11624	-1.5286	3.01e-07	1.9e-06	proline-rich AKT1 substrate 1
Cluster-1617.1	4.3034	4.4e-06	2.39e-05	proline rich region
Cluster-6558.10254	2.306	0.00079552	0.0030236	AdoMet dependent proline di-methyltransferase
Cluster-2881.0	4.8138	0.002079	0.007274	AdoMet dependent proline di-methyltransferase
Cluster-6558.5131	2.2981	0.0013361	0.0048655	Probable Prolyl 4-hydroxylase 3
Cluster-6558.26373	1.4049	0.00046228	0.0018377	Probable Prolyl 4-hydroxylase 10
Cluster-88.0	7.0582	1.64e-08	1.2e-07	Prolyl 4-hydroxylase alpha-subunit, N-terminal region
Cluster-1389.0	6.0162	5.55e-06	2.97e-05	Protein disulfide isomerase (Prolyl 4-hydroxylase beta subunit)
Cluster-1598.0	5.8059	1.66e-05	8.32e-05	Protein disulfide isomerase (Prolyl 4-hydroxylase beta subunit)
Cluster-1624.0	5.3245	0.00019994	0.00084897	Protein disulfide isomerase (Prolyl 4-hydroxylase beta subunit)
Cell membrane related genes
GeneID	log2FoldChange	pval	padj	Gene annotation
Cluster-6558.22652	1.6041	6.23e-228	1.67e-225	Aquaporin TIP2-1-like
Cluster-6558.41391	1.1121	4.9e-14	5.81e-13	PREDICTED: Aquaporin NIP1-1 isoform X1
Cluster-6558.20823	1.0944	1.12e-08	8.3e-08	Aquaporin TIP4-1
Cluster-6558.8666	1.0315	7.92e-05	0.00035808	Aquaporin SIP1-2-like isoform X2
Cluster-12195.0	1.0505	0.010059	0.030017	Aquaporin-like
Cluster-6558.17649	1.1147	6.55e-36	1.96e-34	PREDICTED: probable Aquaporin SIP2-1
Cluster-13168.0	1.9054	5.29e-11	4.96e-10	PREDICTED: probable Aquaporin PIP1-5
Cluster-6558.34968	-1.7545	1.17e-28	2.79e-27	Probable Aquaporin NIP-type
Cluster-6558.5236	1.5888	6.84e-33	1.87e-31	11 kDa late embryogenesis abundant protein
Cluster-6558.21243	-7.0426	1.18e-31	3.1e-30	PREDICTED: late embryogenesis abundant protein EMB564-like
Cluster-6558.8324	-1.7957	4.64e-18	7.06e-17	late embryogenesis abundant protein D-29-like
Cluster-10814.0	-3.961	1.03e-08	7.69e-08	late embryogenesis abundant protein D-34-like
Cluster-6558.22026	-1.2011	0	0	linoleate 13S-lipoxygenase 2-1, chloroplastic-like
Cluster-6558.17794	-1.219	1.54e-145	2.19e-143	linoleate 13S-lipoxygenase 2-1, chloroplastic-like
Cluster-6558.21633	-1.4399	1.6e-88	1.31e-86	linoleate 13S-lipoxygenase 2-1, chloroplastic-like
Cluster-6558.7654	-1.292	8.41e-15	1.05e-13	linoleate 13S-lipoxygenase 2-1, chloroplastic-like
Cluster-6558.37587	8.4802	1.82e-12	1.93e-11	linoleate 13S-lipoxygenase 2-1, chloroplastic-like
Cluster-6558.16669	-2.2963	3.67e-06	2.02e-05	PREDICTED: linoleate 13S-lipoxygenase 2-1, chloroplastic-like
Cluster-6558.33149	-1.0022	0.00036402	0.0014739	probable linoleate 9S-lipoxygenase 5
Cluster-6558.28906	-1.9725	0.00054005	0.0021183	PREDICTED: linoleate 13S-lipoxygenase 2-1, chloroplastic-like, partial
Cluster-6558.4015	4.7108	0.0043253	0.014099	lipoxygenase 6, chloroplastic-like
