# Supplementary material for: Combined analysis of transcriptome and metabolome reveals the molecular mechanism and candidate genes of Haloxylon drought tolerance
Source: Front Plant Sci. 2022 Oct 17;13:1020367. doi: 10.3389/fpls.2022.1020367 (PMC9622360; doi:10.3389/fpls.2022.1020367)
Supplement: Supplementary file 13 [file Table_8.xlsx]

## Sheet: Transcriptome and Metabolome
Candidate differential genes in response to drought stress in H. persicum
Pathway	Tropane, piperidine and pyridine alkaloid biosynthesis
Metabolite	FC	log2FC	Pvalue	VIP	Up/Down	pos/neg
Pipecolic acid	0.534728	-0.903123	3.9339e-06	1.20201	down	pos
lupinine	0.396609	-1.33421	2.02939e-07	1.19241	down	pos
Senecionine	2.0829	1.05859	9.01045e-06	1.17388	up	pos
Tropine	0.403275	-1.31016	4.39485e-08	1.19502	down	pos
L-Phenylalanine	1.84561	0.884094	6.65947e-12	1.21942	up	pos
GeneID	log2FoldChange	pval	padj	Gene annotation
Cluster-3181.33333	3.9391	4.478e-152	8.5663e-150	tropinone reductase I
Cluster-3181.24277	2.2042	5.7383e-146	1.0233e-143	aspartate aminotransferase, cytoplasmic
Cluster-3181.25879	-1.5188	3.198e-95	2.9908e-93	primary-amine oxidase
Cluster-3181.23315	-1.5574	3.4566e-77	2.4408e-75	tropinone reductase I
Cluster-3181.33425	-1.703	2.7616e-38	8.2742e-37	primary-amine oxidase
Cluster-3181.33424	-1.6364	5.8333e-34	1.5217e-32	primary-amine oxidase
Cluster-3181.16756	3.7914	2.497e-30	5.6906e-29	tropinone reductase I
Cluster-3181.13153	5.3557	3.3573e-30	7.6347e-29	primary-amine oxidase
Cluster-3181.27471	-1.0146	9.4672e-22	1.5223e-20	tyrosine aminotransferase
Cluster-3181.14745	4.1115	1.9093e-20	2.8896e-19	aspartate aminotransferase, cytoplasmic
Cluster-3181.41814	10.391	4.9662e-18	6.5835e-17	tropinone reductase I
Cluster-3181.41816	8.9284	1.0634e-13	1.0643e-12	tropinone reductase I
Cluster-3181.33334	8.8617	4.1022e-13	3.9208e-12	tropinone reductase I
Cluster-3181.19179	-1.6599	5.6821e-13	5.377e-12	tyrosine aminotransferase
Cluster-3181.31747	-1.226	6.3564e-09	4.227e-08	tropinone reductase I
Cluster-3181.23910	-1.0583	1.1147e-07	6.5216e-07	bifunctional aspartate aminotransferase and glutamate/aspartate-prephenate aminotransferase
Cluster-3181.33335	1.3746	6.952e-07	3.7076e-06	tropinone reductase I
Cluster-3181.15535	-6.0951	8.5905e-06	4.0111e-05	primary-amine oxidase
Cluster-3181.37636	-5.6274	0.00011515	0.00045725	aspartate aminotransferase, chloroplastic
Cluster-3181.42276	5.8651	0.00016435	0.00063592	primary-amine oxidase
Cluster-3181.5456	5.2477	0.0019905	0.0063319	tropinone reductase I
Cluster-3181.14228	-3.8663	0.0027125	0.0083909	primary-amine oxidase
Pathway	ABC transporters
Metabolite	FC	log2FC	Pvalue	VIP	Up/Down	pos/neg
Betaine	1.74836	0.806006	2.28248e-07	1.20646	up	pos
L-Phenylalanine	1.84561	0.884094	6.65947e-12	1.21942	up	pos
Inositol	2.27292	1.18454	3.09727e-13	1.21953	up	pos
Biotin	2.02341	1.01679	6.86117e-08	1.19261	up	pos
Choline	2.15323	1.1065	8.57276e-12	1.21733	up	pos
GeneID	log2FoldChange	pval	padj	Gene annotation
Cluster-3181.24663	-1.537	1.6439e-47	6.2704e-46	ABC transporter B family member 2-like
Cluster-3181.14516	-1.1537	7.8693e-26	1.5211e-24	PREDICTED: ABC transporter C family member 3-like
Cluster-3181.14517	-1.5569	9.0545e-17	1.1127e-15	ABC transporter C family member 3
Cluster-3181.14196	1.2521	9.9287e-12	8.5114e-11	ABC transporter C family member 3-like
Cluster-3181.33456	-2.5654	3.9977e-10	2.9799e-09	ABC transporter C family member 3-like
Cluster-3181.18568	-1.0718	4.7462e-08	2.8848e-07	ABC transporter C family member 10-like
Cluster-3181.28388	1.1612	1.4894e-06	7.6471e-06	ABC transporter C family member 10-like
Cluster-3181.20268	-1.0163	1.7941e-06	9.1331e-06	ABC transporter C family member 4-like
Cluster-1932.0	4.1181	0.00014508	0.00056657	ABC transporter C family member 3-like
Cluster-6692.0	-1.0676	0.0014061	0.0046115	Putative ABC transporter B family member 8
Cluster-3181.12291	1.2695	0.0016465	0.0053238	PREDICTED: ABC transporter C family member 10
Cluster-3181.12289	1.4298	0.0053172	0.015424	PREDICTED: ABC transporter C family member 10
Cluster-472.0	4.6263	0.011702	0.03116	ABC transporter B family member 9 isoform X2
Cluster-3181.31481	-1.2979	0.017647	0.044716	PREDICTED: ABC transporter C family member 10
Cluster-3181.11846	-3.7814	0.018806	0.047227	ABC transporter C family member 10
Pathway	Tyrosine metabolism
Metabolite	FC	log2FC	Pvalue	VIP	Up/Down	pos/neg
p-Coumaric acid	0.54155	-0.884834	1.8988e-13	1.21995	down	pos
Tyramine	2.47095	1.30506	1.48908e-06	1.20195	up	pos
L-Dopa	240.93	7.91247	7.0413e-15	1.22149	up	pos
GeneID	log2FoldChange	pval	padj	Gene annotation
Cluster-3181.17171	4.1751	0	0	alcohol dehydrogenase class-P
Cluster-3181.25362	3.6698	0	0	polyphenol oxidase
Cluster-3181.34942	3.3513	2.5918e-148	4.7424e-146	polyphenol oxidase
Cluster-3181.24277	2.2042	5.7383e-146	1.0233e-143	aspartate aminotransferase, cytoplasmic
Cluster-3181.6086	2.0969	4.8588e-119	6.4438e-117	homogentisate 1,2-dioxygenase
Cluster-3181.25879	-1.5188	3.198e-95	2.9908e-93	primary-amine oxidase
Cluster-3181.21234	-1.7083	3.6254e-62	1.9264e-60	tyrosine decarboxylase
Cluster-3181.9661	-1.6844	1.716e-51	7.2801e-50	alcohol dehydrogenase class-P
Cluster-3181.33425	-1.703	2.7616e-38	8.2742e-37	primary-amine oxidase
Cluster-3181.16798	-1.8296	1.2596e-36	3.5916e-35	tyrosine decarboxylase
Cluster-3181.33424	-1.6364	5.8333e-34	1.5217e-32	primary-amine oxidase
Cluster-3181.10682	1.5284	1.3375e-30	3.0895e-29	acylpyruvate hydrolase
Cluster-3181.13153	5.3557	3.3573e-30	7.6347e-29	primary-amine oxidase
Cluster-3181.27441	3.4613	5.3859e-30	1.2173e-28	tyrosine decarboxylase
Cluster-3181.27471	-1.0146	9.4672e-22	1.5223e-20	tyrosine aminotransferase
Cluster-3181.14745	4.1115	1.9093e-20	2.8896e-19	aspartate aminotransferase, cytoplasmic
Cluster-3181.33377	-1.5364	7.8662e-18	1.0313e-16	S-(hydroxymethyl)glutathione dehydrogenase / alcohol dehydrogenase
Cluster-3181.1142	10.068	4.5746e-17	5.7139e-16	phenylpyruvate tautomerase
Cluster-3181.19179	-1.6599	5.6821e-13	5.377e-12	tyrosine aminotransferase
Cluster-3181.6180	1.3417	2.975e-11	2.4556e-10	S-(hydroxymethyl)glutathione dehydrogenase / alcohol dehydrogenase
Cluster-3181.23910	-1.0583	1.1147e-07	6.5216e-07	bifunctional aspartate aminotransferase and glutamate/aspartate-prephenate aminotransferase
Cluster-3181.41695	6.3318	7.463e-06	3.513e-05	homogentisate 1,2-dioxygenase
Cluster-3181.15535	-6.0951	8.5905e-06	4.0111e-05	primary-amine oxidase
Cluster-3181.7624	-2.43	4.9789e-05	0.00020895	tyrosine decarboxylase
Cluster-11218.0	1.5402	0.00010527	0.00042043	S-(hydroxymethyl)glutathione dehydrogenase / alcohol dehydrogenase
Cluster-3181.37636	-5.6274	0.00011515	0.00045725	aspartate aminotransferase, chloroplastic
Cluster-3181.42276	5.8651	0.00016435	0.00063592	primary-amine oxidase
Cluster-15325.0	-5.4712	0.00026412	0.00098806	polyphenol oxidase
Cluster-12093.0	-4.6716	0.00099997	0.0033738	tyrosine decarboxylase
Cluster-3181.14228	-3.8663	0.0027125	0.0083909	primary-amine oxidase
Cluster-15325.1	-4.814	0.0032555	0.0099023	polyphenol oxidase
Pathway	Plant hormone signal transduction
Metabolite	FC	log2FC	Pvalue	VIP	Up/Down	pos/neg
Abscisic Acid	1.6477	0.72045	2.59377e-10	1.21413	up	pos
Indole-3-acetic acid	1.55939	0.640978	0.000151975	1.14276	up	pos
Jasmonic acid	0.564609	-0.824676	7.45813e-08	1.17841	down	neg
GeneID	log2FoldChange	pval	padj	Gene annotation
Cluster-3181.17498	3.678	0	0	Auxin-responsive protein SAUR36
Cluster-3181.29197	2.1472	1.8839e-203	5.8298e-201	ethylene receptor
Cluster-3181.17227	1.783	5.2469e-127	7.7936e-125	ethylene receptor
Cluster-3181.22145	-1.6629	3.0458e-115	3.8379e-113	serine/threonine-protein kinase SRK2, SnRK2
Cluster-3181.25198	-1.4437	5.8111e-107	6.5743e-105	protein phosphatase 2C
Cluster-3181.32531	-2.2974	7.5438e-98	7.4063e-96	ethylene-responsive transcription factor 1
Cluster-3181.23829	-2.2867	7.2352e-94	6.6484e-92	abscisic acid receptor PYR/PYL family
Cluster-3181.22849	1.7415	3.5586e-62	1.8941e-60	auxin-responsive protein IAA
Cluster-3181.25890	-2.2648	7.2548e-62	3.8229e-60	two-component response regulator ARR-A family
Cluster-3181.22652	-1.0838	9.7178e-61	4.9754e-59	protein brassinosteroid insensitive 1
Cluster-3181.22115	-1.5006	2.8694e-57	1.364e-55	auxin response factor
Cluster-3181.13494	-1.6211	1.5308e-54	6.8877e-53	two-component response regulator ARR-A family
Cluster-3181.26544	1.1031	1.6208e-53	7.1699e-52	jasmonate ZIM domain-containing protein
Cluster-3181.1782	-3.0439	1.6988e-47	6.4761e-46	auxin responsive GH3 gene family
Cluster-3181.25893	-1.6137	2.3687e-47	8.9861e-46	arabidopsis histidine kinase 2/3/4 (cytokinin receptor)
Cluster-3181.22372	1.3855	5.7121e-47	2.1451e-45	serine/threonine-protein kinase SRK2
Cluster-3181.24733	-1.4096	1.7717e-44	6.2308e-43	transcription factor MYC2
Cluster-3181.6909	-1.6376	5.3726e-39	1.6456e-37	auxin-responsive protein IAA
Cluster-3181.15163	-3.1236	4.6986e-36	1.3113e-34	BRI1 kinase inhibitor 1
Cluster-3181.21410	-1.5812	7.9796e-35	2.1372e-33	Auxin-responsive protein SAUR32
Cluster-3181.33207	5.4992	9.5933e-35	2.5607e-33	transport inhibitor response 1
Cluster-3181.31615	1.2844	5.186e-34	1.3551e-32	probable serine/threonine-protein kinase
Cluster-3181.24355	-1.0543	1.76e-30	4.0476e-29	auxin-responsive protein IAA
Cluster-3181.7829	-1.7967	8.3574e-26	1.6149e-24	coronatine-insensitive protein 1
Cluster-3181.20794	-2.4292	2.2553e-22	3.7457e-21	abscisic acid receptor PYR/PYL family
Cluster-3181.43104	7.4369	2.2849e-22	3.7939e-21	Auxin-responsive protein SAUR50
Cluster-3181.32171	-1.0955	2.7254e-22	4.5069e-21	gibberellin receptor GID1
Cluster-3181.21539	-1.1836	3.1379e-22	5.1626e-21	auxin response factor
Cluster-3181.30351	1.2621	7.1958e-22	1.166e-20	jasmonic acid-amino synthetase
Cluster-3181.33944	-1.4875	1.301e-21	2.0781e-20	auxin responsive GH3 gene family
Cluster-3181.25760	-1.8534	6.3327e-19	8.8113e-18	auxin response factor
Cluster-11545.0	-2.2863	7.4303e-17	9.1757e-16	two-component response regulator ARR-A family
Cluster-3181.5446	1.2266	9.384e-17	1.1525e-15	abscisic acid receptor PYR/PYL family
Cluster-3181.14673	-2.6547	3.0753e-16	3.6678e-15	probable serine/threonine-protein kinase
Cluster-3181.1600	1.6104	5.3442e-16	6.2661e-15	abscisic acid receptor PYR/PYL family
Cluster-3181.13823	-1.398	6.3367e-15	6.908e-14	Auxin-responsive protein SAUR21
Cluster-1516.0	9.3572	1.0089e-14	1.084e-13	auxin responsive GH3 gene family, GH3
Cluster-3181.20666	-1.0056	8.743e-14	8.8167e-13	cyclin D3, plant
Cluster-5516.0	-1.4015	1.0357e-12	9.6105e-12	auxin influx carrier (AUX1 LAX family)
Cluster-3181.12069	1.3219	1.1681e-12	1.0806e-11	auxin-responsive protein IAA
Cluster-3181.19977	-1.2882	2.761e-12	2.4836e-11	histidine-containing phosphotransfer peotein
Cluster-3181.29869	1.4571	4.7311e-12	4.1701e-11	BR-signaling kinase
Cluster-3181.42676	3.3521	1.102e-10	8.6798e-10	ABA responsive element binding factor
Cluster-3181.5314	-3.0549	1.4048e-10	1.0947e-09	histidine-containing phosphotransfer peotein
Cluster-1062.0	7.889	3.9846e-10	2.9709e-09	Auxin-responsive protein SAUR15
Cluster-3181.22350	-2.3379	6.3334e-10	4.6463e-09	Auxin-responsive protein SAUR50
Cluster-3181.3423	2.3991	1.0203e-09	7.3496e-09	auxin response factor
Cluster-3181.35552	1.1773	1.7746e-09	1.246e-08	two-component response regulator ARR-B family
Cluster-3181.1606	7.5232	1.8206e-09	1.2771e-08	pathogenesis-related protein 1
Cluster-3181.10062	1.0573	3.4934e-09	2.3828e-08	EIN3-binding F-box protein
Cluster-3181.21530	-1.4605	2.9498e-08	1.8316e-07	protein phosphatase 2C
Cluster-3648.0	-2.5135	8.2702e-08	4.8998e-07	pathogenesis-related protein 1
Cluster-3181.4790	-2.1245	1.3719e-07	7.9387e-07	auxin-responsive protein IAA
Cluster-3181.28736	-1.3653	1.6463e-07	9.4473e-07	Auxin responsive protein//Yeast mating factor alpha hormone
Cluster-3181.18043	1.3791	2.0649e-07	1.1706e-06	transcription factor TGA
Cluster-3181.37743	1.2109	1.1497e-06	5.984e-06	Auxin responsive protein
Cluster-3181.19018	-3.8771	1.5579e-06	7.9833e-06	Auxin responsive protein//Secretin N-terminal domain
Cluster-6290.0	-1.991	3.0743e-06	1.5189e-05	DELLA protein
Cluster-8707.0	-1.3517	3.9132e-05	0.00016696	auxin responsive GH3 gene family
Cluster-3249.0	-4.9009	3.9905e-05	0.00016997	pathogenesis-related protein 1
Cluster-6054.0	-5.5125	0.00017769	0.00068434	auxin-responsive protein SAUR21-like
Cluster-3181.582	-1.2851	0.00026645	0.00099628	auxin-responsive protein IAA
Cluster-3181.6910	1.3146	0.0011025	0.0036904	auxin-responsive protein IAA
Cluster-8521.0	-1.8543	0.0013919	0.0045681	PREDICTED: auxin-responsive protein SAUR21
Cluster-3181.27509	1.0667	0.0022556	0.0070948	serine/threonine-protein kinase SRK2, SnRK2
Cluster-10201.0	-1.0107	0.0051695	0.015039	transcription factor TGA
Cluster-4150.0	-1.5641	0.0086288	0.023799	Auxin responsive protein
Cluster-3181.34309	2.288	0.0087012	0.023977	histidine-containing phosphotransfer peotein
Cluster-3181.10806	-2.1492	0.0094898	0.025877	auxin response factor
Cluster-8646.0	-1.8756	0.01539	0.039623	coronatine-insensitive protein 1
Pathway	Isoquinoline alkaloid biosynthesis
Metabolite	FC	log2FC	Pvalue	VIP	Up/Down	pos/neg
p-Coumaric acid	0.54155	-0.884834	1.8988e-13	1.21995	down	pos
Tyramine	2.47095	1.30506	1.48908e-06	1.20195	up	pos
3,4-Dihydroxybenzaldehyde	24.4104	4.60942	7.08084e-12	1.22052	up	pos
Sinoacutine	7.22051	2.8521	1.51354e-07	1.2025	up	pos
L-Dopa	240.93	7.91247	7.0413e-15	1.22149	up	pos
Berberine	13.0561	3.70666	2.80953e-06	1.2104	up	pos
GeneID	log2FoldChange	pval	padj	Gene annotation
Cluster-3181.25362	3.6698	0	0	polyphenol oxidase
Cluster-3181.34942	3.3513	2.5918e-148	4.7424e-146	polyphenol oxidase
Cluster-3181.24277	2.2042	5.7383e-146	1.0233e-143	aspartate aminotransferase, cytoplasmic
Cluster-3181.25879	-1.5188	3.198e-95	2.9908e-93	primary-amine oxidase
Cluster-3181.21234	-1.7083	3.6254e-62	1.9264e-60	tyrosine decarboxylase
Cluster-3181.33425	-1.703	2.7616e-38	8.2742e-37	primary-amine oxidase
Cluster-3181.16798	-1.8296	1.2596e-36	3.5916e-35	tyrosine decarboxylase
Cluster-3181.33424	-1.6364	5.8333e-34	1.5217e-32	primary-amine oxidase
Cluster-3181.13153	5.3557	3.3573e-30	7.6347e-29	primary-amine oxidase
Cluster-3181.27441	3.4613	5.3859e-30	1.2173e-28	tyrosine decarboxylase
Cluster-3181.27471	-1.0146	9.4672e-22	1.5223e-20	tyrosine aminotransferase
Cluster-3181.14745	4.1115	1.9093e-20	2.8896e-19	aspartate aminotransferase, cytoplasmic
Cluster-3181.19179	-1.6599	5.6821e-13	5.377e-12	tyrosine aminotransferase
Cluster-3181.23910	-1.0583	1.1147e-07	6.5216e-07	bifunctional aspartate aminotransferase and glutamate/aspartate-prephenate aminotransferase
Cluster-12737.0	-1.3068	1.8065e-06	9.1932e-06	(S)-coclaurine N-methyltransferase
Cluster-3181.15535	-6.0951	8.5905e-06	4.0111e-05	primary-amine oxidase
Cluster-3181.7624	-2.43	4.9789e-05	0.00020895	tyrosine decarboxylase
Cluster-3181.37636	-5.6274	0.00011515	0.00045725	aspartate aminotransferase, chloroplastic
Cluster-3181.42276	5.8651	0.00016435	0.00063592	primary-amine oxidase
Cluster-15325.0	-5.4712	0.00026412	0.00098806	polyphenol oxidase
Cluster-12093.0	-4.6716	0.00099997	0.0033738	tyrosine decarboxylase
Cluster-3181.14228	-3.8663	0.0027125	0.0083909	primary-amine oxidase
Cluster-15325.1	-4.814	0.0032555	0.0099023	polyphenol oxidase
Pathway	Glycerophospholipid metabolism
Metabolite	FC	log2FC	Pvalue	VIP	Up/Down	pos/neg
Phosphocholine	0.305648	-1.71006	6.53324e-10	1.21106	down	pos
Choline	2.15323	1.1065	8.57276e-12	1.21733	up	pos
GeneID	log2FoldChange	pval	padj	Gene annotation
Cluster-3181.25047	3.4034	0	0	glycerol-3-phosphate dehydrogenase (NAD+)
Cluster-3181.26379	3.1966	0	0	phospholipase C
Cluster-3181.39178	3.4705	0	0	phospholipase C
Cluster-3181.23159	3.8485	2.079e-268	1.0416e-265	phospholipase C
Cluster-3181.24796	2.5671	7.1692e-257	3.2327e-254	phospholipase D1/2
Cluster-3181.25017	1.7093	3.0759e-238	1.1913e-235	choline/ethanolamine kinase
Cluster-3181.26707	2.0779	1.0766e-227	3.906e-225	diacylglycerol kinase (ATP)
Cluster-3181.42663	3.4969	5.9162e-180	1.4704e-177	diacylglycerol kinase (ATP)
Cluster-3181.13461	2.1319	2.4519e-133	3.9286e-131	phospholipase D1/2
Cluster-3181.36555	2.3952	6.7441e-107	7.6162e-105	diacylglycerol kinase (ATP)
Cluster-3181.28340	1.5979	1.1787e-103	1.2741e-101	phospholipase D1/2
Cluster-3181.32640	2.7501	1.1739e-83	9.1945e-82	glycerol-3-phosphate O-acyltransferase 3/4
Cluster-3181.24090	-1.1525	2.4824e-77	1.7608e-75	phosphoethanolamine N-methyltransferase
Cluster-3181.20173	4.1962	1.4306e-66	8.3008e-65	lysophospholipase II
Cluster-3181.27073	2.067	8.3631e-66	4.7735e-64	phospholipase D1/2
Cluster-3181.39179	3.2541	3.8287e-65	2.1542e-63	phospholipase C
Cluster-3181.32004	-1.8715	1.7818e-59	8.9554e-58	phospholipase D1/2
Cluster-6729.0	-3.2095	1.4914e-57	7.1706e-56	glycerol-3-phosphate acyltransferase
Cluster-3181.13462	1.5704	5.398e-47	2.0296e-45	phospholipase D1/2
Cluster-3181.10170	1.1307	1.0553e-45	3.833e-44	lysophosphatidylcholine acyltransferase / lyso-PAF acetyltransferase
Cluster-3181.44265	2.7061	6.2809e-45	2.2363e-43	monolysocardiolipin acyltransferase
Cluster-3181.26326	1.118	9.1146e-45	3.2343e-43	choline/ethanolamine kinase
Cluster-3181.17429	1.2324	2.6991e-44	9.4608e-43	phosphatidylserine synthase 2
Cluster-3181.36746	2.2285	7.8571e-44	2.7238e-42	phospholipase C
Cluster-3181.23578	-1.3269	2.361e-41	7.7067e-40	phospholipase C
Cluster-14512.0	-2.5528	4.0247e-40	1.2723e-38	lysophospholipase III
Cluster-3181.407	-2.9511	3.133e-39	9.6572e-38	phospholipase C
Cluster-3181.27242	-2.2045	2.6406e-38	7.9191e-37	lysophospholipase II
Cluster-3181.24661	-1.349	9.0354e-33	2.2616e-31	phosphoethanolamine N-methyltransferase
Cluster-3181.32951	4.1263	1.4304e-30	3.298e-29	glycerol-3-phosphate O-acyltransferase 3/4
Cluster-3181.10501	1.3122	7.1651e-28	1.5042e-26	glycerol-3-phosphate dehydrogenase
Cluster-3181.13460	2.5509	1.593e-27	3.296e-26	phospholipase D1/2
Cluster-3181.16819	1.2784	1.4101e-24	2.5832e-23	phospholipase D1/2
Cluster-3181.30578	-1.1752	8.1196e-24	1.4382e-22	phospholipase C
Cluster-3181.20181	1.687	7.8459e-17	9.6775e-16	glycerol-3-phosphate dehydrogenase (NAD+)
Cluster-3181.5418	-1.8567	1.1277e-15	1.2929e-14	glycerophosphoryl diester phosphodiesterase
Cluster-3181.25204	-9.0707	5.5277e-14	5.6566e-13	glycerol-3-phosphate dehydrogenase (NAD+)
Cluster-3181.27996	1.6619	9.0433e-12	7.783e-11	phospholipase C
Cluster-11017.0	1.36	1.5233e-10	1.1837e-09	glycerol-3-phosphate acyltransferase
Cluster-3181.12026	-2.1808	7.8228e-09	5.156e-08	glycerol-3-phosphate acyltransferase
Cluster-3181.9093	-1.0191	1.9174e-08	1.2114e-07	phospholipase D3/4
Cluster-3181.1450	7.1048	8.3794e-08	4.9623e-07	lysophospholipase II
Cluster-3181.30963	-1.0446	1.445e-07	8.3435e-07	choline/ethanolamine kinase
Cluster-3181.27390	-1.3129	1.4924e-07	8.6061e-07	cardiolipin synthase (CMP-forming)
Cluster-3181.32848	5.4157	4.5129e-06	2.1834e-05	phospholipase C
Cluster-3181.9088	1.3822	9.225e-06	4.2921e-05	phospholipase D3/4
Cluster-3181.18801	-1.0357	2.4783e-05	0.00010873	glycerol-3-phosphate dehydrogenase (NAD+)
Cluster-3181.29092	-1.5329	4.8698e-05	0.00020481	cardiolipin synthase (CMP-forming)
Cluster-3181.45192	1.2452	8.4477e-05	0.00034258	monolysocardiolipin acyltransferase
Cluster-10591.0	-1.6349	0.00052625	0.0018707	glycerol-3-phosphate acyltransferase
Pathway	Biosynthesis of amino acids
Metabolite	FC	log2FC	Pvalue	VIP	Up/Down	pos/neg
L-Saccharopine	1.94876	0.962553	1.4131e-06	1.17127	up	pos
S-Adenosylmethionine	1.73936	0.798555	0.000231366	1.06469	up	pos
Shikimic Acid	2.33814	1.22536	1.29581e-11	1.21668	up	pos
L-Phenylalanine	1.84561	0.884094	6.65947e-12	1.21942	up	pos
L-Asparagine	2.83278	1.50222	2.28702e-07	1.1926	up	pos
GeneID	log2FoldChange	pval	padj	Gene annotation
Cluster-3181.32563	4.4084	0	0	amino-acid N-acetyltransferase
Cluster-3181.28570	1.9698	7.1196e-175	1.677e-172	2,3-bisphosphoglycerate-independent phosphoglycerate mutase
Cluster-3181.24450	1.3725	1.097e-152	2.1114e-150	fructose-bisphosphate aldolase, class I
Cluster-3181.24277	2.2042	5.7383e-146	1.0233e-143	aspartate aminotransferase, cytoplasmic
Cluster-3181.20024	2.9858	1.2765e-134	2.0609e-132	branched-chain amino acid aminotransferase
Cluster-3181.23742	1.5865	1.516e-102	1.6138e-100	pyruvate kinase
Cluster-3181.5963	2.8474	6.0503e-99	6.0722e-97	6-phosphofructokinase 1
Cluster-3181.14640	1.4081	4.2359e-89	3.5559e-87	glutamine synthetase
Cluster-3181.18234	3.4997	2.5644e-88	2.1385e-86	citrate synthase
Cluster-3181.6354	9.4562	2.3e-82	1.7707e-80	anthranilate phosphoribosyltransferase
Cluster-3181.27856	1.6281	3.7613e-81	2.8539e-79	branched-chain amino acid aminotransferase
Cluster-3181.19014	1.072	2.783e-73	1.8377e-71	aconitate hydratase
Cluster-3181.29580	2.1294	2.0816e-71	1.3246e-69	3-dehydroquinate dehydratase / shikimate dehydrogenase
Cluster-3181.31203	3.701	7.5191e-71	4.7325e-69	ribose-phosphate pyrophosphokinase
Cluster-3181.30611	2.2801	7.9402e-59	3.9252e-57	homoserine kinase
Cluster-3181.30362	-2.3817	3.0055e-57	1.4276e-55	dihydroxy-acid dehydratase
Cluster-3181.21104	1.12	3.4558e-52	1.481e-50	glutamate synthase (NADPH/NADH)
Cluster-3181.17223	-7.7503	1.5332e-43	5.2859e-42	tryptophan synthase beta chain
Cluster-3181.20027	1.1064	7.2565e-39	2.2151e-37	isocitrate dehydrogenase (NAD+)
Cluster-3181.21493	-2.3326	9.5823e-37	2.7396e-35	cystathionine gamma-synthase
Cluster-3181.18470	2.2979	6.8201e-35	1.8321e-33	glutamate synthase (NADPH/NADH)
Cluster-3181.23260	-2.0196	2.2385e-34	5.9126e-33	transketolase
Cluster-3181.21839	1.5388	8.8734e-32	2.1479e-30	pyruvate kinase
Cluster-3181.5910	1.6664	1.8326e-31	4.3706e-30	ribose-phosphate pyrophosphokinase
Cluster-3181.11762	3.1339	7.3064e-29	1.5877e-27	2-isopropylmalate synthase
Cluster-3181.4564	1.9697	1.1352e-26	2.2708e-25	acetolactate synthase I/III small subunit
Cluster-7423.0	1.5807	5.4913e-26	1.0682e-24	3-deoxy-7-phosphoheptulonate synthase
Cluster-3181.9769	4.528	6.3758e-24	1.1351e-22	2,3-bisphosphoglycerate-independent phosphoglycerate mutase
Cluster-3181.27471	-1.0146	9.4672e-22	1.5223e-20	tyrosine aminotransferase
Cluster-3181.14745	4.1115	1.9093e-20	2.8896e-19	aspartate aminotransferase, cytoplasmic
Cluster-3181.14804	-1.9563	7.2482e-20	1.0597e-18	2-isopropylmalate synthase
Cluster-3181.35612	10.142	2.4823e-17	3.1606e-16	aconitate hydratase
Cluster-3181.30923	1.3047	4.2703e-17	5.3487e-16	6-phosphofructokinase 1
Cluster-3181.42608	9.5503	2.2537e-15	2.5369e-14	inositol-phosphate phosphatase / L-galactose 1-phosphate phosphatase / histidinol-phosphatase
Cluster-3181.29102	2.2598	5.1734e-15	5.6827e-14	triosephosphate isomerase (TIM)
Cluster-3181.18466	-1.2081	1.2976e-14	1.3851e-13	glutamate synthase (NADPH/NADH)
Cluster-3181.42949	9.2231	2.7389e-14	2.8565e-13	glutamate synthase (NADPH/NADH), GLT1
Cluster-3181.30468	1.2567	4.0298e-14	4.1533e-13	chorismate synthase
Cluster-3181.19179	-1.6599	5.6821e-13	5.377e-12	tyrosine aminotransferase
Cluster-3181.17673	1.2282	2.8578e-12	2.5669e-11	isocitrate dehydrogenase (NAD+)
Cluster-3181.9041	1.1408	6.5818e-12	5.7286e-11	imidazoleglycerol-phosphate dehydratase
Cluster-3181.29631	1.8315	1.0712e-11	9.1576e-11	aconitate hydratase
Cluster-13513.0	3.9325	6.99e-11	5.6041e-10	probable phosphoglycerate mutase
Cluster-3181.3537	8.1544	8.4481e-11	6.7227e-10	6-phosphofructokinase 1
Cluster-3181.28987	2.3991	9.3838e-11	7.4439e-10	arogenate dehydrogenase (NADP+), plant
Cluster-3181.29469	-3.3751	1.6962e-10	1.3123e-09	2-isopropylmalate synthase
Cluster-3181.5466	-1.6058	6.9451e-10	5.0762e-09	3-dehydroquinate dehydratase / shikimate dehydrogenase
Cluster-3181.21069	1.2224	8.0679e-10	5.8615e-09	glutamate synthase (NADPH/NADH)
Cluster-3181.42656	7.6066	9.7809e-10	7.0542e-09	enolase
Cluster-3181.18332	1.9076	3.413e-09	2.3315e-08	pyruvate kinase
Cluster-3181.8370	2.7477	3.898e-09	2.6465e-08	branched-chain amino acid aminotransferase
Cluster-3181.30230	6.9686	3.6246e-08	2.2317e-07	diaminopimelate decarboxylase
Cluster-3181.23910	-1.0583	1.1147e-07	6.5216e-07	bifunctional aspartate aminotransferase and glutamate/aspartate-prephenate aminotransferase
Cluster-3181.11640	-2.5111	1.9174e-07	1.0909e-06	cysteine synthase A
Cluster-3181.9040	1.4449	3.7018e-07	2.0408e-06	imidazoleglycerol-phosphate dehydratase
Cluster-4107.0	1.2529	9.7354e-07	5.1049e-06	6-phosphofructokinase 1
Cluster-3181.23129	1.2708	1.7772e-06	9.0508e-06	pyruvate kinase
Cluster-3181.11641	-1.1915	2.0948e-06	1.0581e-05	cysteine synthase A
Cluster-3181.41474	1.3012	7.2305e-06	3.4101e-05	shikimate kinase
Cluster-3181.25566	1.1234	1.7589e-05	7.8929e-05	ketol-acid reductoisomerase
Cluster-3181.25750	1.3983	2.79e-05	0.00012159	L-3-cyanoalanine synthase/ cysteine synthase
Cluster-3181.33134	1.0769	3.5983e-05	0.00015433	aminoacylase
Cluster-3181.20556	-1.2956	8.6143e-05	0.00034891	glutamate synthase (NADPH/NADH)
Cluster-3181.37636	-5.6274	0.00011515	0.00045725	aspartate aminotransferase, chloroplastic
Cluster-14401.1	-5.5957	0.00013014	0.00051276	fructose-bisphosphate aldolase, class I
Cluster-11781.0	-4.1052	0.00099507	0.0033579	citrate synthase
Cluster-3181.28988	-4.6717	0.0010472	0.0035193	arogenate dehydrogenase (NADP+), plant
Cluster-13946.0	1.5161	0.004024	0.011982	6-phosphofructokinase 1
Cluster-14401.0	-4.0377	0.012335	0.032592	fructose-bisphosphate aldolase, class I
Cluster-3181.4294	1.5592	0.015694	0.040291	acetylglutamate kinase
Cluster-3181.19635	-1.7742	0.019542	0.048775	isocitrate dehydrogenase (NAD+)
Pathway	Phenylpropanoid biosynthesis
Metabolite	FC	log2FC	Pvalue	VIP	Up/Down	pos/neg
Coniferyl alcohol	4.31338	2.10882	3.02734e-11	1.1984	up	neg
trans-Cinnamic acid	0.603832	-0.727781	8.91921e-11	1.19526	down	neg
Ferulaldehyde	0.575554	-0.796978	7.66267e-09	1.18093	down	neg
Caffeic acid	0.592674	-0.754689	2.25488e-06	1.16787	down	neg
Scopolin	0.6179	-0.694555	4.56979e-05	1.09457	down	neg
GeneID	log2FoldChange	pval	padj	Gene annotation
Cluster-3181.2725	4.5387	1.8439e-223	6.5763e-221	beta-glucosidase
Cluster-3181.26024	-1.9039	3.1324e-202	9.5991e-200	beta-glucosidase
Cluster-3181.36102	2.6078	7.3018e-119	9.6432e-117	caffeoyl-CoA O-methyltransferase
Cluster-3181.4566	4.3794	8.0451e-112	9.8234e-110	peroxidase
Cluster-3181.32002	-3.8692	1.434e-104	1.5798e-102	beta-glucosidase
Cluster-3181.17459	-1.8509	6.6007e-104	7.1843e-102	peroxidase
Cluster-3181.7138	3.5355	4.3357e-99	4.3723e-97	caffeic acid 3-O-methyltransferase
Cluster-3181.15643	-2.78	3.0716e-97	2.9694e-95	peroxidase
Cluster-3181.1339	6.3378	2.4097e-96	2.3084e-94	caffeic acid 3-O-methyltransferase
Cluster-3181.2	5.514	3.3071e-82	2.5398e-80	caffeic acid 3-O-methyltransferase
Cluster-3181.22069	-1.5677	1.6633e-73	1.1053e-71	4-coumarate--CoA ligase
Cluster-3181.24511	1.4691	6.3951e-59	3.1763e-57	cinnamyl-alcohol dehydrogenase
Cluster-3181.24767	-1.3819	6.465e-59	3.206e-57	cinnamyl-alcohol dehydrogenase
Cluster-3181.33631	1.5063	2.4161e-51	1.0209e-49	peroxidase
Cluster-3181.25829	1.0238	8.6155e-51	3.5805e-49	trans-cinnamate 4-monooxygenase
Cluster-3181.8076	-6.2178	6.077e-48	2.3449e-46	caffeic acid 3-O-methyltransferase
Cluster-3181.2585	6.4704	6.0017e-47	2.2525e-45	peroxidase
Cluster-3181.23311	-2.0026	2.0496e-43	7.0396e-42	peroxidase
Cluster-3181.7359	-1.2852	8.1278e-42	2.6863e-40	ferulate-5-hydroxylase
Cluster-3181.1817	-3.3392	4.6717e-33	1.1783e-31	shikimate O-hydroxycinnamoyltransferase
Cluster-3181.22777	-2.0194	6.1382e-33	1.5426e-31	caffeic acid 3-O-methyltransferase
Cluster-3181.34742	-3.1813	6.3332e-31	1.4786e-29	shikimate O-hydroxycinnamoyltransferase
Cluster-3181.24386	1.1935	3.5949e-28	7.6128e-27	trans-cinnamate 4-monooxygenase
Cluster-3181.34951	3.9834	1.0531e-26	2.1085e-25	peroxidase
Cluster-3181.13625	-1.5999	3.803e-25	7.158e-24	shikimate O-hydroxycinnamoyltransferase
Cluster-3181.26488	1.1899	5.9118e-25	1.1041e-23	peroxidase
Cluster-9433.0	-1.5653	4.486e-23	7.6746e-22	beta-glucosidase
Cluster-3181.30334	2.2041	2.8617e-21	4.4961e-20	cinnamyl-alcohol dehydrogenase
Cluster-3181.27847	-1.8846	1.2478e-19	1.8e-18	peroxidase
Cluster-3181.31433	-1.2077	5.3543e-18	7.0875e-17	peroxidase
Cluster-3181.22831	4.4464	3.076e-17	3.8907e-16	caffeoyl-CoA O-methyltransferase
Cluster-5014.0	-3.5936	4.7296e-17	5.9042e-16	shikimate O-hydroxycinnamoyltransferase
Cluster-3181.13119	1.6599	2.9556e-15	3.2994e-14	peroxidase
Cluster-3181.14221	-1.0754	1.1207e-12	1.0377e-11	4-coumarate--CoA ligase
Cluster-3181.34896	1.0786	1.2145e-12	1.1222e-11	caffeic acid 3-O-methyltransferase
Cluster-3181.1716	-2.7897	7.4539e-12	6.4601e-11	caffeic acid 3-O-methyltransferase
Cluster-3181.10467	-1.0316	2.2734e-11	1.8943e-10	beta-glucosidase
Cluster-13133.0	-3.0122	3.5429e-10	2.6547e-09	peroxidase
Cluster-3181.32040	1.3361	2.3675e-09	1.6431e-08	peroxidase
Cluster-3181.1682	6.518	5.4514e-09	3.6474e-08	peroxidase 12, PER12
Cluster-3788.0	2.6329	5.8308e-09	3.8893e-08	4-coumarate--CoA ligase
Cluster-3181.9783	1.1393	3.2235e-08	1.9935e-07	beta-glucosidase
Cluster-3181.43590	-1.4258	4.1152e-08	2.518e-07	beta-glucosidase
Cluster-11052.0	-1.4163	6.0861e-08	3.6559e-07	beta-glucosidase
Cluster-3181.29125	-1.5954	1.2108e-07	7.0599e-07	cinnamyl-alcohol dehydrogenase
Cluster-7084.0	3.6476	4.2593e-07	2.3302e-06	shikimate O-hydroxycinnamoyltransferase
Cluster-3181.30983	-2.9079	6.0482e-07	3.2467e-06	beta-glucosidase
Cluster-3181.19347	4.9226	7.3576e-07	3.911e-06	beta-glucosidase
Cluster-12034.0	-2.1215	8.8551e-07	4.6654e-06	peroxidase
Cluster-7883.0	3.6835	1.0796e-06	5.6377e-06	peroxidase
Cluster-3181.2748	6.5009	2.5961e-06	1.2963e-05	beta-glucosidase
Cluster-3181.34952	6.038	5.1097e-06	2.4582e-05	peroxidase
Cluster-5819.0	-2.6475	8.8487e-06	4.1271e-05	coumaroylquinate(coumaroylshikimate) 3'-monooxygenase
Cluster-13662.0	3.9742	1.5927e-05	7.1893e-05	peroxidase
Cluster-3181.13464	-1.4172	2.0654e-05	9.1755e-05	coumaroylquinate(coumaroylshikimate) 3'-monooxygenase
Cluster-3181.44755	-5.589	2.1119e-05	9.3689e-05	peroxidase
Cluster-3181.14219	-1.483	2.1958e-05	9.7159e-05	4-coumarate--CoA ligase
Cluster-3181.15467	-1.8362	5.3634e-05	0.00022406	peroxidase
Cluster-3181.30267	1.1699	6.5878e-05	0.00027151	peroxidase
Cluster-3181.43826	4.6701	0.00019224	0.00073692	caffeic acid 3-O-methyltransferase
Cluster-12537.0	1.2087	0.00019344	0.00074102	beta-glucosidase
Cluster-11447.0	1.5486	0.0008064	0.0027643	caffeic acid 3-O-methyltransferase
Cluster-3181.39617	-1.6242	0.0012543	0.0041519	shikimate O-hydroxycinnamoyltransferase
Cluster-3181.14251	1.8777	0.0014441	0.0047242	caffeic acid 3-O-methyltransferase
Cluster-3181.7668	-1.3384	0.0016885	0.0054462	shikimate O-hydroxycinnamoyltransferase
Cluster-6121.0	-4.4162	0.0024512	0.0076493	coniferyl-aldehyde dehydrogenase
Cluster-3181.12323	-4.8786	0.0024611	0.0076769	beta-glucosidase
Cluster-3181.29126	-1.6501	0.0025917	0.0080472	cinnamyl-alcohol dehydrogenase
Cluster-3717.0	1.7556	0.0028477	0.0087651	caffeoyl-CoA O-methyltransferase
Cluster-3181.28248	-1.0647	0.0034206	0.010355	beta-glucosidase
Cluster-5830.0	-3.9842	0.0094473	0.025772	peroxidase
Cluster-11009.0	2.0226	0.01158	0.030891	peroxidase
Cluster-3567.0	4.0123	0.016501	0.042112	shikimate O-hydroxycinnamoyltransferase
Pathway	Flavonoid biosynthesis
Metabolite	FC	log2FC	Pvalue	VIP	Up/Down	pos/neg
Luteolin	0.449311	-1.15421	2.29286e-06	1.15895	down	neg
Naringin	0.166099	-2.58988	1.77853e-10	1.19117	down	neg
Pelargonidin chloride	6.52506	2.70599	7.07934e-17	1.19956	up	neg
GeneID	log2FoldChange	pval	padj	Gene annotation
Cluster-3181.26285	-5.4213	0	0	chalcone synthase
Cluster-3181.36102	2.6078	7.3018e-119	9.6432e-117	caffeoyl-CoA O-methyltransferase
Cluster-3181.22046	-2.7339	9.2705e-96	8.7348e-94	flavonol synthase
Cluster-3181.8802	-3.0163	7.9402e-93	7.0998e-91	flavonoid 3'-monooxygenase
Cluster-3181.20617	-4.3791	1.3506e-91	1.1744e-89	chalcone synthase
Cluster-3181.23576	2.1118	1.6647e-81	1.2707e-79	chalcone synthase
Cluster-3181.11787	-2.7112	1.885e-80	1.4049e-78	naringenin 3-dioxygenase
Cluster-3181.25829	1.0238	8.6155e-51	3.5805e-49	trans-cinnamate 4-monooxygenase
Cluster-3181.1817	-3.3392	4.6717e-33	1.1783e-31	shikimate O-hydroxycinnamoyltransferase
Cluster-3181.17126	-1.9054	3.6394e-32	8.9431e-31	chalcone synthase
Cluster-3181.34742	-3.1813	6.3332e-31	1.4786e-29	shikimate O-hydroxycinnamoyltransferase
Cluster-3181.24386	1.1935	3.5949e-28	7.6128e-27	trans-cinnamate 4-monooxygenase
Cluster-3181.13625	-1.5999	3.803e-25	7.158e-24	shikimate O-hydroxycinnamoyltransferase
Cluster-3181.22831	4.4464	3.076e-17	3.8907e-16	caffeoyl-CoA O-methyltransferase, CCOMT
Cluster-5014.0	-3.5936	4.7296e-17	5.9042e-16	shikimate O-hydroxycinnamoyltransferase
Cluster-3181.23575	-7.3418	6.0222e-09	4.0123e-08	chalcone synthase
Cluster-7084.0	3.6476	4.2593e-07	2.3302e-06	shikimate O-hydroxycinnamoyltransferase
Cluster-5819.0	-2.6475	8.8487e-06	4.1271e-05	coumaroylquinate(coumaroylshikimate) 3'-monooxygenase
Cluster-3181.13464	-1.4172	2.0654e-05	9.1755e-05	coumaroylquinate(coumaroylshikimate) 3'-monooxygenase
Cluster-3181.8901	-1.3614	0.00049343	0.0017645	naringenin 3-dioxygenase
Cluster-3181.39617	-1.6242	0.0012543	0.0041519	shikimate O-hydroxycinnamoyltransferase
Cluster-3181.7668	-1.3384	0.0016885	0.0054462	shikimate O-hydroxycinnamoyltransferase
Cluster-3717.0	1.7556	0.0028477	0.0087651	caffeoyl-CoA O-methyltransferase
Cluster-3567.0	4.0123	0.016501	0.042112	shikimate O-hydroxycinnamoyltransferase
Pathway	Starch and sucrose metabolism
Metabolite	FC	log2FC	Pvalue	VIP	Up/Down	pos/neg
Isomaltose	142.636	7.1562	9.4657e-07	1.19198	up	neg
Sucrose	1.85021	0.887686	9.52731e-06	1.17985	up	neg
α,α-Trehalose	1.63123	0.705963	1.65674e-08	1.19445	up	neg
GeneID	log2FoldChange	pval	padj	Gene annotation
Cluster-3181.36869	4.8814	0	0	UDPglucose 6-dehydrogenase
Cluster-3181.26024	-1.9039	3.1324e-202	9.5991e-200	beta-glucosidase
Cluster-3181.10582	2.3258	1.386e-198	4.0696e-196	fructokinase
Cluster-3181.27435	1.9836	6.1923e-171	1.3911e-168	alpha-glucosidase
Cluster-3181.30857	1.5461	4.2658e-128	6.4269e-126	alpha-glucosidase
Cluster-3181.32002	-3.8692	1.434e-104	1.5798e-102	beta-glucosidase
Cluster-3181.33733	1.9952	2.3156e-100	2.3925e-98	hexokinase
Cluster-3181.23966	1.2451	5.8933e-85	4.7272e-83	alpha-glucosidase
Cluster-3181.23667	2.0836	2.7357e-81	2.0782e-79	pectinesterase
Cluster-3181.29679	1.1462	2.9491e-74	1.9954e-72	alpha-1,4-galacturonosyltransferase
Cluster-3181.39256	1.6094	6.539e-64	3.5895e-62	trehalose 6-phosphate synthase/phosphatase
Cluster-3181.33131	-1.2562	1.1033e-48	4.345e-47	fructokinase
Cluster-3181.7283	1.5823	2.3809e-42	7.9779e-41	alpha-1,4-galacturonosyltransferase
Cluster-3181.26406	-2.3935	4.3969e-40	1.3878e-38	1,4-beta-D-xylan synthase
Cluster-3181.26084	-1.3547	1.2826e-38	3.8853e-37	beta-amylase
Cluster-3181.29199	-1.8046	2.4244e-36	6.8418e-35	glucan endo-1,3-beta-glucosidase 1/2/3
Cluster-11540.0	-3.2641	2.4136e-35	6.5675e-34	pectinesterase
Cluster-3181.27814	-2.4281	1.9387e-32	4.8108e-31	alpha-1,4-galacturonosyltransferase
Cluster-3181.34991	-1.0327	1.7601e-31	4.1993e-30	sucrose-phosphate synthase
Cluster-3181.5457	1.2305	2.7382e-31	6.4959e-30	trehalose 6-phosphate phosphatase
Cluster-3181.7207	2.6774	1.151e-27	2.3964e-26	hexokinase
Cluster-3181.13421	-3.7804	2.4558e-26	4.8522e-25	UDPglucose 6-dehydrogenase
Cluster-3181.27837	-2.7579	6.6813e-25	1.2445e-23	alpha-1,4-galacturonosyltransferase
Cluster-3181.44764	2.3741	7.9784e-24	1.4136e-22	pectinesterase
Cluster-9433.0	-1.5653	4.486e-23	7.6746e-22	beta-glucosidase
Cluster-3181.26405	-1.1931	3.7016e-17	4.6568e-16	sucrose-phosphate synthase
Cluster-3181.8120	-1.1975	6.634e-15	7.2168e-14	alpha-1,4-galacturonosyltransferase
Cluster-3181.29155	-1.1862	1.4247e-14	1.5147e-13	starch synthase
Cluster-3181.9348	1.0127	5.8038e-13	5.4888e-12	endoglucanase
Cluster-7552.1	3.0632	6.2802e-13	5.9217e-12	sucrose synthase
Cluster-3181.44763	2.5388	1.7389e-12	1.5863e-11	pectinesterase
Cluster-3181.16984	1.134	3.3873e-12	3.0177e-11	alpha,alpha-trehalase
Cluster-3181.10467	-1.0316	2.2734e-11	1.8943e-10	beta-glucosidase
Cluster-3181.42590	7.4976	5.6116e-09	3.7506e-08	4-alpha-glucanotransferase DPE2
Cluster-3181.9783	1.1393	3.2235e-08	1.9935e-07	beta-glucosidase
Cluster-3181.16981	-7.1053	3.791e-08	2.3273e-07	alpha,alpha-trehalase
Cluster-3181.43590	-1.4258	4.1152e-08	2.518e-07	beta-glucosidase
Cluster-3181.18760	3.1367	5.3099e-08	3.2105e-07	fructokinase
Cluster-11052.0	-1.4163	6.0861e-08	3.6559e-07	beta-glucosidase
Cluster-3181.40537	-1.9687	7.679e-08	4.5678e-07	fructokinase
Cluster-3181.31828	-4.8022	4.9127e-07	2.6685e-06	phosphoglucomutase
Cluster-3181.16983	-2.2764	5.7558e-07	3.0992e-06	alpha,alpha-trehalase
Cluster-3181.30983	-2.9079	6.0482e-07	3.2467e-06	beta-glucosidase
Cluster-3181.19347	4.9226	7.3576e-07	3.911e-06	beta-glucosidase
Cluster-3181.37795	2.9871	1.1086e-06	5.7789e-06	fructokinase
Cluster-3181.2748	6.5009	2.5961e-06	1.2963e-05	beta-glucosidase
Cluster-3181.34695	-2.8998	2.9867e-06	1.4785e-05	beta-amylase
Cluster-3181.18073	1.0105	3.4535e-06	1.6956e-05	pectinesterase
Cluster-3181.33734	1.979	3.577e-05	0.00015349	hexokinase
Cluster-3181.4409	3.7954	0.00023312	0.00088016	alpha,alpha-trehalase
Cluster-13140.0	1.2434	0.0023126	0.0072578	endoglucanase
Cluster-3181.12323	-4.8786	0.0024611	0.0076769	beta-glucosidase
Cluster-3181.28248	-1.0647	0.0034206	0.010355	beta-glucosidase
Cluster-3181.11302	-1.0853	0.0048432	0.014176	glucose-1-phosphate adenylyltransferase
Cluster-3181.1585	1.224	0.0076077	0.021295	pectinesterase
Cluster-14899.0	2.4354	0.0079627	0.022158	pectinesterase
Cluster-3181.42238	1.7632	0.0097508	0.026519	beta-amylase
Cluster-3181.12106	-1.8558	0.013075	0.034343	glycogen phosphorylase
Cluster-3181.8068	-2.8852	0.01425	0.037014	trehalose 6-phosphate synthase/phosphatase
Cluster-3181.31817	-3.8537	0.014886	0.038459	beta-fructofuranosidase
Pathway	Pyruvate metabolism
Metabolite	FC	log2FC	Pvalue	VIP	Up/Down	pos/neg
Succinic acid	2.20104	1.13818	8.0989e-07	1.17704	up	neg
2-Isopropylmalic acid	14.0065	3.80803	1.65518e-17	1.19964	up	neg
GeneID	log2FoldChange	pval	padj	Gene annotation
Cluster-3181.4222	4.3989	0	0	phosphoenolpyruvate carboxykinase (ATP)
Cluster-3181.23742	1.5865	1.516e-102	1.6138e-100	pyruvate kinase
Cluster-3181.6381	-2.8574	1.4783e-39	4.6017e-38	phosphoenolpyruvate carboxylase
Cluster-3181.16002	1.1146	1.2437e-35	3.415e-34	dihydrolipoamide dehydrogenase
Cluster-3181.24036	-1.4726	2.2521e-34	5.9461e-33	malate dehydrogenase (oxaloacetate-decarboxylating)(NADP+)
Cluster-3181.21839	1.5388	8.8734e-32	2.1479e-30	pyruvate kinase
Cluster-3181.11762	3.1339	7.3064e-29	1.5877e-27	2-isopropylmalate synthase
Cluster-3181.23941	5.8129	7.8029e-22	1.2611e-20	phosphoenolpyruvate carboxylase
Cluster-3181.14804	-1.9563	7.2482e-20	1.0597e-18	2-isopropylmalate synthase
Cluster-3181.28576	1.2337	6.7563e-18	8.8967e-17	pyruvate dehydrogenase E2 component (dihydrolipoamide acetyltransferase)
Cluster-3181.5502	9.4743	2.4364e-15	2.7382e-14	aldehyde dehydrogenase (NAD+)
Cluster-3181.35799	9.5289	2.9725e-15	3.3171e-14	aldehyde dehydrogenase (NAD+)
Cluster-3181.26689	-5.3451	6.3586e-14	6.4722e-13	malate dehydrogenase (oxaloacetate-decarboxylating)(NADP+)
Cluster-3181.28832	3.8526	2.0944e-13	2.0442e-12	malate dehydrogenase (oxaloacetate-decarboxylating)(NADP+)
Cluster-3181.29014	-8.84	2.6496e-13	2.5673e-12	aldehyde dehydrogenase (NAD+)
Cluster-3181.29469	-3.3751	1.6962e-10	1.3123e-09	2-isopropylmalate synthase
Cluster-3181.19988	3.6795	1.0702e-09	7.6918e-09	aldehyde dehydrogenase (NAD+)
Cluster-3181.28695	-1.0562	1.1707e-09	8.3737e-09	aldehyde dehydrogenase (NAD+)
Cluster-3181.36914	1.013	1.3559e-09	9.6307e-09	L-lactate dehydrogenase
Cluster-3181.13541	-4.9624	1.9277e-09	1.3505e-08	lactoylglutathione lyase
Cluster-3181.18078	2.1572	2.971e-09	2.0426e-08	phosphoenolpyruvate carboxylase
Cluster-3181.18332	1.9076	3.413e-09	2.3315e-08	pyruvate kinase
Cluster-3181.14364	-1.9323	5.601e-08	3.3787e-07	malate dehydrogenase
Cluster-3181.1821	6.9231	2.2224e-07	1.2553e-06	malate dehydrogenase
Cluster-14129.0	5.7143	4.0361e-07	2.2146e-06	D-lactate dehydratase
Cluster-744.0	2.0163	9.2613e-07	4.8708e-06	aldehyde dehydrogenase (NAD+)
Cluster-3181.41984	6.594	1.6394e-06	8.3855e-06	pyruvate dehydrogenase E2 component (dihydrolipoamide acetyltransferase)
Cluster-3181.23129	1.2708	1.7772e-06	9.0508e-06	pyruvate kinase
Cluster-3181.39101	3.5099	5.4965e-06	2.6319e-05	phosphoenolpyruvate carboxylase
Cluster-3181.34975	-1.0392	5.7958e-06	2.7668e-05	aldehyde dehydrogenase (NAD+)
Cluster-3181.18074	-1.3441	8.334e-06	3.8982e-05	lactoylglutathione lyase
Cluster-1738.0	6.1075	2.4535e-05	0.00010773	phosphoenolpyruvate carboxylase
Cluster-3181.16043	1.1214	3.764e-05	0.00016098	pyruvate dehydrogenase E2 component (dihydrolipoamide acetyltransferase)
Cluster-3181.17083	-5.413	4.8542e-05	0.00020421	malate dehydrogenase (oxaloacetate-decarboxylating)(NADP+)
Cluster-3181.13341	5.515	0.00044602	0.0016064	aldehyde dehydrogenase (NAD+)
Cluster-3181.25763	-1.7139	0.0034676	0.010486	phosphoenolpyruvate carboxylase
Cluster-3181.19910	-1.1403	0.007192	0.020231	acetyl-CoA synthetase
Cluster-3181.15962	-4.5168	0.010344	0.027956	phosphoenolpyruvate carboxylase
Pathway	2-Oxocarboxylic acid metabolism
Metabolite	FC	log2FC	Pvalue	VIP	Up/Down	pos/neg
L-Phenylalanine	1.84561	0.884094	6.65947e-12	1.21942	up	pos
L-Tryptophan	2.06151	1.0437	0.000869208	1.08622	up	neg
2-Isopropylmalic acid	14.0065	3.80803	1.65518e-17	1.19964	up	neg
Citric acid	2.99709	1.58356	2.08512e-07	1.18812	up	neg
Citraconic acid	1.51466	0.59899	1.7712e-07	1.16631	up	neg
GeneID	log2FoldChange	pval	padj	Gene annotation
Cluster-3181.23184	2.9894	0	0	N-hydroxythioamide S-beta-glucosyltransferase
Cluster-3181.32563	4.4084	0	0	amino-acid N-acetyltransferase
Cluster-3181.24277	2.2042	5.7383e-146	1.0233e-143	aspartate aminotransferase, cytoplasmic
Cluster-3181.20024	2.9858	1.2765e-134	2.0609e-132	branched-chain amino acid aminotransferase
Cluster-3181.18234	3.4997	2.5644e-88	2.1385e-86	citrate synthase
Cluster-3181.27856	1.6281	3.7613e-81	2.8539e-79	branched-chain amino acid aminotransferase
Cluster-3181.19014	1.072	2.783e-73	1.8377e-71	aconitate hydratase
Cluster-3181.30362	-2.3817	3.0055e-57	1.4276e-55	dihydroxy-acid dehydratase
Cluster-3181.20027	1.1064	7.2565e-39	2.2151e-37	isocitrate dehydrogenase (NAD+)
Cluster-3181.11762	3.1339	7.3064e-29	1.5877e-27	2-isopropylmalate synthase
Cluster-3181.4564	1.9697	1.1352e-26	2.2708e-25	acetolactate synthase I/III small subunit
Cluster-3181.14745	4.1115	1.9093e-20	2.8896e-19	aspartate aminotransferase, cytoplasmic
Cluster-3181.14804	-1.9563	7.2482e-20	1.0597e-18	2-isopropylmalate synthase
Cluster-3181.35612	10.142	2.4823e-17	3.1606e-16	aconitate hydratase
Cluster-3181.17673	1.2282	2.8578e-12	2.5669e-11	isocitrate dehydrogenase (NAD+)
Cluster-3181.29631	1.8315	1.0712e-11	9.1576e-11	aconitate hydratase
Cluster-3181.29469	-3.3751	1.6962e-10	1.3123e-09	2-isopropylmalate synthase
Cluster-3181.8370	2.7477	3.898e-09	2.6465e-08	branched-chain amino acid aminotransferase
Cluster-3181.25566	1.1234	1.7589e-05	7.8929e-05	ketol-acid reductoisomerase
Cluster-3181.33134	1.0769	3.5983e-05	0.00015433	aminoacylase
Cluster-3181.37636	-5.6274	0.00011515	0.00045725	aspartate aminotransferase, chloroplastic
Cluster-11781.0	-4.1052	0.00099507	0.0033579	citrate synthase
Cluster-3181.4294	1.5592	0.015694	0.040291	acetylglutamate kinase
Cluster-3181.19635	-1.7742	0.019542	0.048775	isocitrate dehydrogenase (NAD+)
Pathway	Glycolysis / Gluconeogenesis
Metabolite	FC	log2FC	Pvalue	VIP	Up/Down	pos/neg
Arbutin	0.378763	-1.40063	5.94901e-09	1.1899	down	neg
GeneID	log2FoldChange	pval	padj	Gene annotation
Cluster-3181.17171	4.1751	0	0	alcohol dehydrogenase class-P
Cluster-3181.32111	2.9608	0	0	multiple inositol-polyphosphate phosphatase / 2,3-bisphosphoglycerate 3-phosphatase
Cluster-3181.4222	4.3989	0	0	phosphoenolpyruvate carboxykinase (ATP)
Cluster-3181.32110	2.4859	4.1152e-183	1.0433e-180	multiple inositol-polyphosphate phosphatase / 2,3-bisphosphoglycerate 3-phosphatase
Cluster-3181.28570	1.9698	7.1196e-175	1.677e-172	2,3-bisphosphoglycerate-independent phosphoglycerate mutase
Cluster-3181.13016	2.7326	5.8202e-167	1.2847e-164	pyruvate decarboxylase
Cluster-3181.24450	1.3725	1.097e-152	2.1114e-150	fructose-bisphosphate aldolase, class I
Cluster-3181.32259	2.1938	5.4335e-151	1.0301e-148	pyruvate decarboxylase
Cluster-3181.23279	-2.3902	5.7753e-143	1.0016e-140	glucose-6-phosphate 1-epimerase
Cluster-3181.32264	2.1798	7.4247e-110	8.8268e-108	pyruvate decarboxylase
Cluster-3181.23742	1.5865	1.516e-102	1.6138e-100	pyruvate kinase
Cluster-3181.33733	1.9952	2.3156e-100	2.3925e-98	hexokinase
Cluster-3181.5963	2.8474	6.0503e-99	6.0722e-97	6-phosphofructokinase 1
Cluster-3181.30260	2.4086	6.0471e-96	5.7147e-94	pyruvate decarboxylase
Cluster-3181.32263	2.2814	1.7787e-95	1.6709e-93	pyruvate decarboxylase
Cluster-3181.32266	1.7399	1.5066e-87	1.2417e-85	pyruvate decarboxylase
Cluster-3181.9661	-1.6844	1.716e-51	7.2801e-50	alcohol dehydrogenase class-P
Cluster-3181.25521	-1.2969	2.5397e-51	1.0717e-49	fructose-1,6-bisphosphatase I
Cluster-3181.16002	1.1146	1.2437e-35	3.415e-34	dihydrolipoamide dehydrogenase
Cluster-3181.21839	1.5388	8.8734e-32	2.1479e-30	pyruvate kinase
Cluster-3181.7207	2.6774	1.151e-27	2.3964e-26	hexokinase
Cluster-3181.21638	3.6174	2.0107e-25	3.8359e-24	pyruvate decarboxylase
Cluster-3181.9769	4.528	6.3758e-24	1.1351e-22	2,3-bisphosphoglycerate-independent phosphoglycerate mutase
Cluster-3181.22608	-2.7083	4.4743e-22	7.3194e-21	fructose-1,6-bisphosphatase I
Cluster-3181.21889	-1.0381	8.0737e-20	1.1779e-18	glucose-6-phosphate 1-epimerase
Cluster-3181.28576	1.2337	6.7563e-18	8.8967e-17	pyruvate dehydrogenase E2 component (dihydrolipoamide acetyltransferase)
Cluster-3181.33377	-1.5364	7.8662e-18	1.0313e-16	S-(hydroxymethyl)glutathione dehydrogenase / alcohol dehydrogenase
Cluster-3181.30923	1.3047	4.2703e-17	5.3487e-16	6-phosphofructokinase 1
Cluster-3181.5502	9.4743	2.4364e-15	2.7382e-14	aldehyde dehydrogenase (NAD+)
Cluster-3181.35799	9.5289	2.9725e-15	3.3171e-14	aldehyde dehydrogenase (NAD+), ALDH
Cluster-3181.29102	2.2598	5.1734e-15	5.6827e-14	triosephosphate isomerase (TIM)
Cluster-3181.29014	-8.84	2.6496e-13	2.5673e-12	aldehyde dehydrogenase (NAD+)
Cluster-3181.6180	1.3417	2.975e-11	2.4556e-10	S-(hydroxymethyl)glutathione dehydrogenase / alcohol dehydrogenase
Cluster-3181.15779	1.2895	4.4168e-11	3.5968e-10	multiple inositol-polyphosphate phosphatase / 2,3-bisphosphoglycerate 3-phosphatase
Cluster-13513.0	3.9325	6.99e-11	5.6041e-10	probable phosphoglycerate mutase
Cluster-3181.3537	8.1544	8.4481e-11	6.7227e-10	6-phosphofructokinase 1
Cluster-3181.32260	1.3601	4.8858e-10	3.6179e-09	pyruvate decarboxylase
Cluster-3181.42656	7.6066	9.7809e-10	7.0542e-09	enolase
Cluster-3181.19988	3.6795	1.0702e-09	7.6918e-09	aldehyde dehydrogenase (NAD+)
Cluster-3181.28695	-1.0562	1.1707e-09	8.3737e-09	aldehyde dehydrogenase (NAD+)
Cluster-3181.36914	1.013	1.3559e-09	9.6307e-09	L-lactate dehydrogenase
Cluster-3181.18332	1.9076	3.413e-09	2.3315e-08	pyruvate kinase
Cluster-3181.31828	-4.8022	4.9127e-07	2.6685e-06	phosphoglucomutase
Cluster-744.0	2.0163	9.2613e-07	4.8708e-06	aldehyde dehydrogenase (NAD+)
Cluster-4107.0	1.2529	9.7354e-07	5.1049e-06	6-phosphofructokinase 1
Cluster-3181.41984	6.594	1.6394e-06	8.3855e-06	pyruvate dehydrogenase E2 component (dihydrolipoamide acetyltransferase)
Cluster-3181.23129	1.2708	1.7772e-06	9.0508e-06	pyruvate kinase
Cluster-3181.34975	-1.0392	5.7958e-06	2.7668e-05	aldehyde dehydrogenase (NAD+)
Cluster-3181.33734	1.979	3.577e-05	0.00015349	hexokinase
Cluster-3181.16043	1.1214	3.764e-05	0.00016098	pyruvate dehydrogenase E2 component (dihydrolipoamide acetyltransferase)
Cluster-11218.0	1.5402	0.00010527	0.00042043	S-(hydroxymethyl)glutathione dehydrogenase / alcohol dehydrogenase
Cluster-14401.1	-5.5957	0.00013014	0.00051276	fructose-bisphosphate aldolase, class I
Cluster-3181.13341	5.515	0.00044602	0.0016064	aldehyde dehydrogenase (NAD+)
Cluster-6524.1	-5.3271	0.00057425	0.0020267	fructose-1,6-bisphosphatase I
Cluster-3181.32265	2.8564	0.0016958	0.005467	pyruvate decarboxylase
Cluster-3181.32261	-1.2233	0.002968	0.0091012	pyruvate decarboxylase
Cluster-13946.0	1.5161	0.004024	0.011982	6-phosphofructokinase 1
Cluster-3181.19910	-1.1403	0.007192	0.020231	acetyl-CoA synthetase
Cluster-3181.33803	-1.9994	0.010378	0.02804	glyceraldehyde-3-phosphate dehydrogenase (NADP+)
Cluster-14401.0	-4.0377	0.012335	0.032592	fructose-bisphosphate aldolase, class I
Pathway	Ascorbate and aldarate metabolism
Metabolite	FC	log2FC	Pvalue	VIP	Up/Down	pos/neg
alpha-Ketoglutaric acid	2.34778	1.2313	3.43831e-14	1.22039	up	pos
Inositol	2.27292	1.18454	3.09727e-13	1.21953	up	pos
D-Saccharic acid	2.22507	1.15385	3.34255e-13	1.19852	up	neg
D-Glucaric acid	3.14921	1.65499	2.49358e-10	1.19051	up	neg
Ascorbic acid	0.360966	-1.47006	2.84135e-08	1.18826	down	neg
D-Galacturonic acid	1.73116	0.791738	1.99118e-05	1.10874	up	neg
Dehydroascorbic acid	1.73322	0.793458	8.70317e-07	1.18471	up	neg
GeneID	log2FoldChange	pval	padj	Gene annotation
Cluster-3181.36869	4.8814	0	0	UDPglucose 6-dehydrogenase
Cluster-3181.24544	-1.1197	6.8645e-53	2.9927e-51	GDP-L-galactose phosphorylase
Cluster-3181.23805	-1.4348	2.803e-51	1.182e-49	L-ascorbate peroxidase
Cluster-3181.20348	-1.0362	2.811e-36	7.908e-35	GDP-D-mannose 3', 5'-epimerase
Cluster-3181.13421	-3.7804	2.4558e-26	4.8522e-25	UDPglucose 6-dehydrogenase
Cluster-3181.42608	9.5503	2.2537e-15	2.5369e-14	inositol-phosphate phosphatase / L-galactose 1-phosphate phosphatase / histidinol-phosphatase, IMPL2
Cluster-3181.5502	9.4743	2.4364e-15	2.7382e-14	aldehyde dehydrogenase (NAD+)
Cluster-3181.35799	9.5289	2.9725e-15	3.3171e-14	aldehyde dehydrogenase (NAD+)
Cluster-3181.29014	-8.84	2.6496e-13	2.5673e-12	aldehyde dehydrogenase (NAD+)
Cluster-3181.20186	-1.156	8.5863e-10	6.2238e-09	monodehydroascorbate reductase (NADH)
Cluster-3181.19988	3.6795	1.0702e-09	7.6918e-09	aldehyde dehydrogenase (NAD+)
Cluster-3181.28695	-1.0562	1.1707e-09	8.3737e-09	aldehyde dehydrogenase (NAD+)
Cluster-3181.18755	-1.1561	6.6679e-09	4.4234e-08	GDP-L-galactose phosphorylase
Cluster-744.0	2.0163	9.2613e-07	4.8708e-06	aldehyde dehydrogenase (NAD+)
Cluster-3181.34975	-1.0392	5.7958e-06	2.7668e-05	aldehyde dehydrogenase (NAD+)
Cluster-3181.36778	-1.1654	2.1638e-05	9.5879e-05	L-ascorbate peroxidase
Cluster-3181.13341	5.515	0.00044602	0.0016064	aldehyde dehydrogenase (NAD+)
Cluster-3181.31335	-2.8485	0.0016187	0.0052432	GDP-L-galactose phosphorylase
Pathway	Aminoacyl-tRNA biosynthesis
Metabolite	FC	log2FC	Pvalue	VIP	Up/Down	pos/neg
L-Phenylalanine	1.84561	0.884094	6.65947e-12	1.21942	up	pos
L-Asparagine	2.83278	1.50222	2.28702e-07	1.1926	up	pos
10-Formyl-THF	1.81177	0.857398	6.27158e-08	1.1841	up	neg
L-Glutamic acid	1.74507	0.803283	3.2055e-06	1.17637	up	neg
L-Tryptophan	2.06151	1.0437	0.000869208	1.08622	up	neg
L-Histidine	1.99634	0.997361	6.3832e-05	1.11751	up	neg
GeneID	log2FoldChange	pval	padj	Gene annotation
Cluster-3181.7805	3.2397	8.32e-242	3.3033e-239	arginyl-tRNA synthetase
Cluster-3181.28677	-1.3534	9.0444e-37	2.587e-35	leucyl-tRNA synthetase
Cluster-3181.22854	2.8246	3.049e-26	5.9961e-25	lysyl-tRNA synthetase, class II
Cluster-3181.29225	-1.0682	1.3754e-18	1.8786e-17	valyl-tRNA synthetase
Cluster-3181.15359	1.8635	1.9408e-17	2.4881e-16	aspartyl-tRNA(Asn)/glutamyl-tRNA(Gln) amidotransferase subunit C
Cluster-3181.13743	2.0727	4.1884e-17	5.2493e-16	cysteinyl-tRNA synthetase
Cluster-3181.34410	1.0866	9.9017e-16	1.1404e-14	valyl-tRNA synthetase
Cluster-5409.0	1.5349	1.3378e-10	1.0446e-09	glutaminyl-tRNA synthetase
Cluster-3181.3404	6.4382	4.9039e-09	3.2923e-08	tyrosyl-tRNA synthetase
Cluster-3181.42224	7.5097	5.282e-09	3.5389e-08	histidyl-tRNA synthetase
Cluster-3181.18917	1.671	2.4138e-08	1.5096e-07	tyrosyl-tRNA synthetase
Cluster-3181.2638	6.8102	6.8942e-07	3.6786e-06	glycyl-tRNA synthetase
Cluster-3181.33068	1.1323	1.1278e-06	5.8737e-06	tyrosyl-tRNA synthetase
Cluster-3181.42765	6.1008	2.5988e-05	0.00011371	isoleucyl-tRNA synthetase
Cluster-3181.3905	1.0783	0.00061404	0.0021527	methionyl-tRNA formyltransferase
Cluster-3181.10351	1.5334	0.00079026	0.0027133	glycyl-tRNA synthetase
Cluster-3181.34624	1.2945	0.0012969	0.0042814	lysyl-tRNA synthetase, class II
Cluster-3181.27417	-1.749	0.0022328	0.0070313	alanyl-tRNA synthetase
Cluster-3181.42203	4.4904	0.018211	0.045927	glycyl-tRNA synthetase
Pathway	Phenylalanine metabolism
Metabolite	FC	log2FC	Pvalue	VIP	Up/Down	pos/neg
Succinic acid	2.20104	1.13818	8.0989e-07	1.17704	up	neg
Phenylglyoxylic acid	0.596029	-0.746545	1.84629e-08	1.18871	down	neg
trans-Cinnamic acid	0.603832	-0.727781	8.91921e-11	1.19526	down	neg
N-Acetyl-L-phenylalanine	1.75311	0.809916	2.49182e-10	1.19499	up	neg
D-Phenylalanine	0.343038	-1.54356	0.00136528	1.0666	down	neg
GeneID	log2FoldChange	pval	padj	Gene annotation
Cluster-3181.24277	2.2042	5.7383e-146	1.0233e-143	aspartate aminotransferase, cytoplasmic
Cluster-3181.36102	2.6078	7.3018e-119	9.6432e-117	caffeoyl-CoA O-methyltransferase
Cluster-3181.25879	-1.5188	3.198e-95	2.9908e-93	primary-amine oxidase
Cluster-3181.22069	-1.5677	1.6633e-73	1.1053e-71	4-coumarate--CoA ligase
Cluster-3181.23482	1.0977	4.8534e-52	2.073e-50	amidase
Cluster-3181.25829	1.0238	8.6155e-51	3.5805e-49	trans-cinnamate 4-monooxygenase
Cluster-3181.33425	-1.703	2.7616e-38	8.2742e-37	primary-amine oxidase
Cluster-3181.33424	-1.6364	5.8333e-34	1.5217e-32	primary-amine oxidase
Cluster-3181.13153	5.3557	3.3573e-30	7.6347e-29	primary-amine oxidase
Cluster-3181.24386	1.1935	3.5949e-28	7.6128e-27	trans-cinnamate 4-monooxygenase
Cluster-3181.25768	1.0494	9.8806e-23	1.6678e-21	amidase
Cluster-3181.27471	-1.0146	9.4672e-22	1.5223e-20	tyrosine aminotransferase
Cluster-3181.14745	4.1115	1.9093e-20	2.8896e-19	aspartate aminotransferase, cytoplasmic
Cluster-3181.22831	4.4464	3.076e-17	3.8907e-16	caffeoyl-CoA O-methyltransferase
Cluster-3181.1142	10.068	4.5746e-17	5.7139e-16	phenylpyruvate tautomerase
Cluster-3181.19179	-1.6599	5.6821e-13	5.377e-12	tyrosine aminotransferase
Cluster-3181.14221	-1.0754	1.1207e-12	1.0377e-11	4-coumarate--CoA ligase
Cluster-3788.0	2.6329	5.8308e-09	3.8893e-08	4-coumarate--CoA ligase
Cluster-3181.23910	-1.0583	1.1147e-07	6.5216e-07	bifunctional aspartate aminotransferase and glutamate/aspartate-prephenate aminotransferase
Cluster-3181.31861	1.4888	6.4922e-06	3.0789e-05	amidase
Cluster-3181.26948	-2.3302	7.7908e-06	3.6583e-05	amidase
Cluster-3181.15535	-6.0951	8.5905e-06	4.0111e-05	primary-amine oxidase
Cluster-9715.2	2.0209	1.8215e-05	8.1547e-05	amidase
Cluster-3181.14219	-1.483	2.1958e-05	9.7159e-05	4-coumarate--CoA ligase
Cluster-3181.37636	-5.6274	0.00011515	0.00045725	aspartate aminotransferase, chloroplastic
Cluster-3181.42276	5.8651	0.00016435	0.00063592	primary-amine oxidase
Cluster-3181.14228	-3.8663	0.0027125	0.0083909	primary-amine oxidase
Cluster-3717.0	1.7556	0.0028477	0.0087651	caffeoyl-CoA O-methyltransferase
Cluster-3181.11397	1.5923	0.0036751	0.011046	amidase
Pathway	Glyoxylate and dicarboxylate metabolism
Metabolite	FC	log2FC	Pvalue	VIP	Up/Down	pos/neg
alpha-Ketoglutaric acid	2.34778	1.2313	3.43831e-14	1.22039	up	pos
Succinic acid	2.20104	1.13818	8.0989e-07	1.17704	up	neg
D-Ribulose 1,5-bisphosphate	13.5792	3.76333	1.91274e-10	1.19851	up	neg
L-Glutamic acid	1.74507	0.803283	3.2055e-06	1.17637	up	neg
Citric acid	2.99709	1.58356	2.08512e-07	1.18812	up	neg
Tartaric acid	3.74588	1.90531	3.77753e-06	1.16467	up	neg
GeneID	log2FoldChange	pval	padj	Gene annotation
Cluster-3181.14640	1.4081	4.2359e-89	3.5559e-87	glutamine synthetase
Cluster-3181.18234	3.4997	2.5644e-88	2.1385e-86	citrate synthase
Cluster-3181.19014	1.072	2.783e-73	1.8377e-71	aconitate hydratase
Cluster-3181.35457	1.4137	8.9278e-59	4.4065e-57	hydroxypyruvate reductase 2
Cluster-3181.16002	1.1146	1.2437e-35	3.415e-34	dihydrolipoamide dehydrogenase
Cluster-3181.13647	-2.4438	3.6502e-32	8.9627e-31	isocitrate lyase
Cluster-3181.12205	-1.1892	1.5763e-21	2.5109e-20	(S)-2-hydroxy-acid oxidase
Cluster-3181.35612	10.142	2.4823e-17	3.1606e-16	aconitate hydratase
Cluster-3181.19407	-1.0727	9.4779e-12	8.1393e-11	glycine cleavage system H protein
Cluster-3181.29631	1.8315	1.0712e-11	9.1576e-11	aconitate hydratase
Cluster-3181.12372	-1.4671	3.2206e-11	2.6525e-10	hydroxypyruvate reductase 2
Cluster-3181.14364	-1.9323	5.601e-08	3.3787e-07	malate dehydrogenase
Cluster-3181.1821	6.9231	2.2224e-07	1.2553e-06	malate dehydrogenase
Cluster-3181.10143	-2.0116	4.2619e-06	2.0697e-05	hydroxypyruvate reductase 2
Cluster-3181.11356	-2.0889	2.8461e-05	0.00012387	hydroxypyruvate reductase 2
Cluster-3181.6635	-1.6345	0.00019955	0.00076233	ribulose-bisphosphate carboxylase small chain
Cluster-11781.0	-4.1052	0.00099507	0.0033579	citrate synthase
Cluster-3181.21995	-1.0373	0.0011296	0.0037747	ribulose-bisphosphate carboxylase small chain
Pathway	Carbon metabolism
Metabolite	FC	log2FC	Pvalue	VIP	Up/Down	pos/neg
D-Ribulose 1,5-bisphosphate	13.5792	3.76333	1.91274e-10	1.19851	up	neg
10-Formyl-THF	1.81177	0.857398	6.27158e-08	1.1841	up	neg
Gluconolactone	2.87523	1.52368	2.66602e-13	1.19791	up	neg
Citric acid	2.99709	1.58356	2.08512e-07	1.18812	up	neg
GeneID	log2FoldChange	pval	padj	Gene annotation
Cluster-3181.4222	4.3989	0	0	phosphoenolpyruvate carboxykinase (ATP)
Cluster-3181.28570	1.9698	7.1196e-175	1.677e-172	2,3-bisphosphoglycerate-independent phosphoglycerate mutase
Cluster-3181.24450	1.3725	1.097e-152	2.1114e-150	fructose-bisphosphate aldolase, class I
Cluster-3181.24277	2.2042	5.7383e-146	1.0233e-143	aspartate aminotransferase, cytoplasmic
Cluster-3181.23742	1.5865	1.516e-102	1.6138e-100	pyruvate kinase
Cluster-3181.33733	1.9952	2.3156e-100	2.3925e-98	hexokinase
Cluster-3181.5963	2.8474	6.0503e-99	6.0722e-97	6-phosphofructokinase 1
Cluster-3181.18234	3.4997	2.5644e-88	2.1385e-86	citrate synthase
Cluster-3181.19014	1.072	2.783e-73	1.8377e-71	aconitate hydratase
Cluster-3181.31203	3.701	7.5191e-71	4.7325e-69	ribose-phosphate pyrophosphokinase
Cluster-3181.15989	1.8029	5.1311e-68	3.0849e-66	glutamate dehydrogenase (NAD(P)+)
Cluster-3181.35457	1.4137	8.9278e-59	4.4065e-57	hydroxypyruvate reductase 2
Cluster-3181.25521	-1.2969	2.5397e-51	1.0717e-49	fructose-1,6-bisphosphatase I
Cluster-3181.31236	2.0237	4.1021e-46	1.5073e-44	glutamate dehydrogenase (NAD(P)+)
Cluster-3181.23028	1.1189	9.9324e-46	3.6098e-44	6-phosphogluconolactonase
Cluster-3181.6381	-2.8574	1.4783e-39	4.6017e-38	phosphoenolpyruvate carboxylase
Cluster-3181.20027	1.1064	7.2565e-39	2.2151e-37	isocitrate dehydrogenase (NAD+)
Cluster-3181.16002	1.1146	1.2437e-35	3.415e-34	dihydrolipoamide dehydrogenase
Cluster-3181.43559	1.6877	1.4932e-34	3.959e-33	malonate-semialdehyde dehydrogenase (acetylating) / methylmalonate-semialdehyde dehydrogenase
Cluster-3181.23260	-2.0196	2.2385e-34	5.9126e-33	transketolase
Cluster-3181.24036	-1.4726	2.2521e-34	5.9461e-33	malate dehydrogenase (oxaloacetate-decarboxylating)(NADP+)
Cluster-3181.13647	-2.4438	3.6502e-32	8.9627e-31	isocitrate lyase
Cluster-3181.21839	1.5388	8.8734e-32	2.1479e-30	pyruvate kinase
Cluster-3181.27312	-1.3716	1.2905e-31	3.1048e-30	sedoheptulose-bisphosphatase
Cluster-3181.5910	1.6664	1.8326e-31	4.3706e-30	ribose-phosphate pyrophosphokinase
Cluster-3181.15180	1.3545	1.358e-28	2.9269e-27	3-hydroxyisobutyryl-CoA hydrolase
Cluster-3181.7207	2.6774	1.151e-27	2.3964e-26	hexokinase
Cluster-3181.15181	1.214	3.6367e-25	6.8489e-24	3-hydroxyisobutyryl-CoA hydrolase
Cluster-3181.9769	4.528	6.3758e-24	1.1351e-22	2,3-bisphosphoglycerate-independent phosphoglycerate mutase
Cluster-3181.22608	-2.7083	4.4743e-22	7.3194e-21	fructose-1,6-bisphosphatase I
Cluster-3181.23941	5.8129	7.8029e-22	1.2611e-20	phosphoenolpyruvate carboxylase
Cluster-3181.12205	-1.1892	1.5763e-21	2.5109e-20	(S)-2-hydroxy-acid oxidase
Cluster-3181.14745	4.1115	1.9093e-20	2.8896e-19	aspartate aminotransferase, cytoplasmic
Cluster-3181.15337	1.1119	2.4676e-19	3.5013e-18	2-oxoglutarate dehydrogenase E1 component
Cluster-3181.28576	1.2337	6.7563e-18	8.8967e-17	pyruvate dehydrogenase E2 component (dihydrolipoamide acetyltransferase)
Cluster-3181.33377	-1.5364	7.8662e-18	1.0313e-16	S-(hydroxymethyl)glutathione dehydrogenase / alcohol dehydrogenase
Cluster-3181.35612	10.142	2.4823e-17	3.1606e-16	aconitate hydratase
Cluster-3181.30923	1.3047	4.2703e-17	5.3487e-16	6-phosphofructokinase 1
Cluster-3181.26318	-1.1984	5.9837e-16	6.9835e-15	sedoheptulose-bisphosphatase
Cluster-3181.29102	2.2598	5.1734e-15	5.6827e-14	triosephosphate isomerase (TIM)
Cluster-3181.23427	-1.4599	1.3481e-14	1.4366e-13	3-hydroxyisobutyryl-CoA hydrolase
Cluster-3181.26689	-5.3451	6.3586e-14	6.4722e-13	malate dehydrogenase (oxaloacetate-decarboxylating)(NADP+)
Cluster-3181.28832	3.8526	2.0944e-13	2.0442e-12	malate dehydrogenase (oxaloacetate-decarboxylating)(NADP+)
Cluster-3181.17673	1.2282	2.8578e-12	2.5669e-11	isocitrate dehydrogenase (NAD+)
Cluster-3181.29631	1.8315	1.0712e-11	9.1576e-11	aconitate hydratase
Cluster-3181.6180	1.3417	2.975e-11	2.4556e-10	S-(hydroxymethyl)glutathione dehydrogenase / alcohol dehydrogenase
Cluster-3181.12372	-1.4671	3.2206e-11	2.6525e-10	hydroxypyruvate reductase 2
Cluster-13513.0	3.9325	6.99e-11	5.6041e-10	probable phosphoglycerate mutase
Cluster-3181.3537	8.1544	8.4481e-11	6.7227e-10	6-phosphofructokinase 1
Cluster-3181.42656	7.6066	9.7809e-10	7.0542e-09	enolase
Cluster-3181.18078	2.1572	2.971e-09	2.0426e-08	phosphoenolpyruvate carboxylase
Cluster-3181.18332	1.9076	3.413e-09	2.3315e-08	pyruvate kinase
Cluster-3181.29221	-1.5161	3.5013e-09	2.3875e-08	glucose-6-phosphate 1-dehydrogenase
Cluster-3181.14364	-1.9323	5.601e-08	3.3787e-07	malate dehydrogenase
Cluster-3181.11640	-2.5111	1.9174e-07	1.0909e-06	cysteine synthase A
Cluster-3181.1821	6.9231	2.2224e-07	1.2553e-06	malate dehydrogenase
Cluster-4107.0	1.2529	9.7354e-07	5.1049e-06	6-phosphofructokinase 1
Cluster-3181.41984	6.594	1.6394e-06	8.3855e-06	pyruvate dehydrogenase E2 component (dihydrolipoamide acetyltransferase)
Cluster-3181.23129	1.2708	1.7772e-06	9.0508e-06	pyruvate kinase
Cluster-3181.11641	-1.1915	2.0948e-06	1.0581e-05	cysteine synthase A
Cluster-3181.10143	-2.0116	4.2619e-06	2.0697e-05	hydroxypyruvate reductase 2
Cluster-3181.39101	3.5099	5.4965e-06	2.6319e-05	phosphoenolpyruvate carboxylase
Cluster-1738.0	6.1075	2.4535e-05	0.00010773	phosphoenolpyruvate carboxylase
Cluster-3181.25750	1.3983	2.79e-05	0.00012159	L-3-cyanoalanine synthase/ cysteine synthase
Cluster-3181.11356	-2.0889	2.8461e-05	0.00012387	hydroxypyruvate reductase 2
Cluster-3181.33734	1.979	3.577e-05	0.00015349	hexokinase
Cluster-3181.16043	1.1214	3.764e-05	0.00016098	pyruvate dehydrogenase E2 component (dihydrolipoamide acetyltransferase)
Cluster-3181.17083	-5.413	4.8542e-05	0.00020421	malate dehydrogenase (oxaloacetate-decarboxylating)(NADP+)
Cluster-11218.0	1.5402	0.00010527	0.00042043	S-(hydroxymethyl)glutathione dehydrogenase / alcohol dehydrogenase
Cluster-14401.1	-5.5957	0.00013014	0.00051276	fructose-bisphosphate aldolase, class I
Cluster-3181.6635	-1.6345	0.00019955	0.00076233	ribulose-bisphosphate carboxylase small chain
Cluster-3181.22204	-1.0963	0.00027955	0.0010419	6-phosphogluconate dehydrogenase
Cluster-6524.1	-5.3271	0.00057425	0.0020267	fructose-1,6-bisphosphatase I
Cluster-3181.30665	-5.3257	0.00071016	0.0024594	6-phosphogluconate dehydrogenase
Cluster-1072.0	5.4794	0.0007684	0.0026427	3-hydroxyisobutyryl-CoA hydrolase
Cluster-3181.14826	-4.7805	0.00090498	0.0030741	3-hydroxyisobutyryl-CoA hydrolase
Cluster-11781.0	-4.1052	0.00099507	0.0033579	citrate synthase
Cluster-3181.21995	-1.0373	0.0011296	0.0037747	ribulose-bisphosphate carboxylase small chain
Cluster-3181.25763	-1.7139	0.0034676	0.010486	phosphoenolpyruvate carboxylase
Cluster-13946.0	1.5161	0.004024	0.011982	6-phosphofructokinase 1
Cluster-3181.19910	-1.1403	0.007192	0.020231	acetyl-CoA synthetase
Cluster-3181.15962	-4.5168	0.010344	0.027956	phosphoenolpyruvate carboxylase
Cluster-3181.33803	-1.9994	0.010378	0.02804	glyceraldehyde-3-phosphate dehydrogenase (NADP+)
Cluster-14401.0	-4.0377	0.012335	0.032592	fructose-bisphosphate aldolase, class I
Cluster-3181.13802	-1.0061	0.017912	0.045307	3-hydroxyisobutyryl-CoA hydrolase
Cluster-3181.19635	-1.7742	0.019542	0.048775	isocitrate dehydrogenase (NAD+)
Pathway	Glutathione metabolism
Metabolite	FC	log2FC	Pvalue	VIP	Up/Down	pos/neg
L-Glutamic acid	1.74507	0.803283	3.2055e-06	1.17637	up	neg
Ascorbic acid	0.360966	-1.47006	2.84135e-08	1.18826	down	neg
Dehydroascorbic acid	1.73322	0.793458	8.70317e-07	1.18471	up	neg
Glutathione	38.2474	5.25729	2.48838e-10	1.19927	up	neg
Oxidized glutathione	1.74533	0.803503	5.01095e-05	1.11466	up	neg
GeneID	log2FoldChange	pval	padj	Gene annotation
Cluster-3181.24725	2.5042	1.3386e-210	4.4243e-208	glutathione S-transferase
Cluster-3181.23648	2.1165	3.5808e-146	6.4218e-144	glutathione S-transferase
Cluster-3181.35857	3.1064	7.6991e-114	9.5864e-112	glutathione S-transferase
Cluster-3181.31394	1.6161	5.4178e-86	4.3792e-84	glutathione reductase (NADPH)
Cluster-3181.35856	2.6242	2.9255e-64	1.6129e-62	glutathione S-transferase
Cluster-3181.35910	1.1374	5.4226e-54	2.4158e-52	glutamate--cysteine ligase
Cluster-3181.22307	-1.6802	1.7544e-52	7.5807e-51	glutathione S-transferase
Cluster-3181.16521	-2.2731	2.9615e-52	1.2727e-50	glutathione S-transferase
Cluster-3181.23805	-1.4348	2.803e-51	1.182e-49	L-ascorbate peroxidase
Cluster-3181.35855	3.8048	4.3579e-48	1.6898e-46	glutathione S-transferase
Cluster-3181.740	2.6454	7.3604e-47	2.7526e-45	glutathione S-transferase
Cluster-3181.25071	-2.1505	7.152e-39	2.1843e-37	glutathione S-transferase
Cluster-3181.32068	1.0081	8.8741e-37	2.5394e-35	glutathione S-transferase
Cluster-3181.35854	2.5246	1.0563e-35	2.9081e-34	glutathione S-transferase
Cluster-3181.13699	2.3439	2.2024e-30	5.0392e-29	ribonucleoside-diphosphate reductase subunit M1
Cluster-3181.1927	1.682	2.5989e-29	5.7344e-28	glutathione S-transferase
Cluster-3181.27184	-1.1923	4.4898e-26	8.7778e-25	glutathione S-transferase
Cluster-3181.27182	-1.1552	1.7015e-22	2.8378e-21	glutathione S-transferase
Cluster-3181.31915	-1.9643	9.0141e-22	1.4513e-20	glutathione S-transferase
Cluster-3181.42144	9.4622	1.0089e-14	1.084e-13	glutathione reductase (NADPH), GR
Cluster-3181.42740	6.8049	1.1049e-14	1.184e-13	gamma-glutamyltranspeptidase / glutathione hydrolase / leukotriene-C4 hydrolase
Cluster-3181.1282	1.9563	5.3799e-12	4.7183e-11	glutathione S-transferase
Cluster-9322.0	-3.1375	6.6653e-12	5.7973e-11	glutathione S-transferase
Cluster-3181.16744	-8.3361	9.1365e-12	7.8589e-11	glutathione reductase (NADPH)
Cluster-3181.11369	-1.0918	1.186e-10	9.3142e-10	ribonucleoside-diphosphate reductase subunit M2
Cluster-3181.42226	7.8514	1.4177e-09	1.0049e-08	glutathione reductase (NADPH)
Cluster-3181.29221	-1.5161	3.5013e-09	2.3875e-08	glucose-6-phosphate 1-dehydrogenase
Cluster-3181.27058	-1.0374	1.9275e-08	1.2169e-07	glutathione S-transferase
Cluster-3181.31896	-3.4035	2.6685e-08	1.6631e-07	glutathione reductase (NADPH)
Cluster-3373.0	7.1473	5.0947e-08	3.0851e-07	glutathione S-transferase
Cluster-10310.0	-1.7478	8.9746e-07	4.7256e-06	glutathione S-transferase
Cluster-3181.15258	-1.1716	8.1867e-06	3.8336e-05	ribonucleoside-diphosphate reductase subunit M1
Cluster-3181.36778	-1.1654	2.1638e-05	9.5879e-05	L-ascorbate peroxidase
Cluster-6085.0	-3.8979	2.399e-05	0.00010553	glutathione S-transferase
Cluster-9933.0	-1.4162	3.4887e-05	0.00015003	glutathione S-transferase
Cluster-3181.40095	-1.6466	0.00013598	0.00053421	glutathione S-transferase
Cluster-3181.22204	-1.0963	0.00027955	0.0010419	6-phosphogluconate dehydrogenase
Cluster-3181.32186	-5.3306	0.00036011	0.0013188	aminopeptidase N
Cluster-3181.30665	-5.3257	0.00071016	0.0024594	6-phosphogluconate dehydrogenase
Cluster-3181.26454	-1.4389	0.011847	0.031473	glutathione S-transferase
Cluster-10669.0	1.2067	0.012688	0.033435	glutathione S-transferase
Pathway	Cutin, suberine and wax biosynthesis
Metabolite	FC	log2FC	Pvalue	VIP	Up/Down	pos/neg
Docosanoic Acid	1.71239	0.776011	4.2433e-07	1.15869	up	neg
GeneID	log2FoldChange	pval	padj	Gene annotation
Cluster-3181.36739	-2.8368	9.0609e-118	1.1818e-115	fatty acid omega-hydroxy dehydrogenase
Cluster-3181.9132	-2.7417	2.3723e-87	1.9475e-85	fatty acid omega-hydroxylase
Cluster-3181.23079	-2.5523	4.3117e-81	3.2676e-79	omega-hydroxypalmitate O-feruloyl transferase
Cluster-3181.26206	-2.3926	1.59e-57	7.6387e-56	fatty acid omega-hydroxylase
Cluster-3181.7961	2.7338	4.2711e-57	2.0227e-55	Fatty acyl-CoA reductase 3, FAR3
Cluster-3181.17573	1.1506	1.0498e-30	2.4329e-29	peroxygenase
Cluster-3181.32182	1.6536	2.5437e-13	2.4689e-12	peroxygenase
Cluster-5668.0	-1.3746	8.6525e-13	8.0765e-12	alcohol-forming fatty acyl-CoA reductase
Cluster-9756.0	-1.2488	3.1725e-12	2.8363e-11	fatty acid omega-hydroxylase
Cluster-3181.32179	1.5639	2.3955e-11	1.9924e-10	peroxygenase
Cluster-4093.0	-1.7476	2.8364e-05	0.0001235	alcohol-forming fatty acyl-CoA reductase
Cluster-3181.41596	1.3559	0.004791	0.014043	alcohol-forming fatty acyl-CoA reductase
Cluster-12293.0	-1.0663	0.0062411	0.017814	fatty acid omega-hydroxylase
Cluster-3181.5249	-1.9207	0.0088802	0.024409	fatty acid omega-hydroxy dehydrogenase

## Sheet: Genes related to physiology
Genes related to the regulation of physiological indicators in H. persicum
Plant hormone related genes
GeneID	log2FoldChange	pval	padj	Gene annotation
Cluster-3181.23829	-2.2867	7.2352e-94	6.6484e-92	Abscisic acid receptor PYL9
Cluster-3181.20794	-2.4292	2.2553e-22	3.7457e-21	Abscisic acid receptor PYL9
Cluster-3181.5446	1.2266	9.384e-17	1.1525e-15	Abscisic acid receptor PYL3
Cluster-3181.1600	1.6104	5.3442e-16	6.2661e-15	Abscisic acid receptor PYL4
Cluster-3181.30598	4.1372	3.2786e-283	1.848e-280	E3 ubiquitin-protein ligase PUB23-like
Cluster-3181.25507	-2.0877	3.3568e-198	9.7653e-196	PREDICTED: probable E3 ubiquitin-protein ligase XERICO
Cluster-3181.14638	1.2353	1.1105e-84	8.8624e-83	PREDICTED: E3 ubiquitin-protein ligase RNF181
Cluster-3181.25210	-2.241	1.0769e-82	8.3313e-81	E3 ubiquitin-protein ligase RDUF1-like
Cluster-3181.21513	1.4329	2.9263e-77	2.0687e-75	probable E3 ubiquitin-protein ligase ARI8
Cluster-3181.31682	1.2447	1.0612e-76	7.4268e-75	E3 ubiquitin-protein ligase BRE1-like 2 isoform X1
Cluster-3181.32229	1.3925	3.1347e-74	2.1187e-72	E3 ubiquitin-protein ligase RING1-like
Cluster-3181.23957	1.2997	1.4791e-71	9.451e-70	probable E3 ubiquitin-protein ligase RZFP34
Cluster-3181.28638	-1.177	1.6149e-57	7.7523e-56	E3 ubiquitin-protein ligase COP1 isoform X1
Cluster-3181.23793	1.3476	1.3534e-55	6.2409e-54	probable E3 ubiquitin-protein ligase RHY1A isoform X1
Cluster-3181.19909	-1.6365	8.3865e-45	2.9793e-43	PREDICTED: E3 ubiquitin-protein ligase SDIR1
Cluster-3181.22043	1.1791	9.3342e-45	3.3104e-43	PREDICTED: E3 ubiquitin-protein ligase RKP
Cluster-3181.37331	1.1031	8.6464e-35	2.3128e-33	ERAD-associated E3 ubiquitin-protein ligase HRD1B-like
Cluster-3181.10995	1.147	1.0779e-34	2.8722e-33	probable BOI-related E3 ubiquitin-protein ligase 2
Cluster-3181.24363	-1.0413	8.9478e-29	1.9378e-27	E3 ubiquitin-protein ligase RFWD3-like
Cluster-3181.14379	1.1269	9.9264e-28	2.0715e-26	probable E3 ubiquitin-protein ligase RHB1A
Cluster-3181.19044	2.0159	1.1251e-27	2.3441e-26	probable E3 ubiquitin-protein ligase ARI8
Cluster-3181.30689	-5.0151	6.7216e-26	1.3024e-24	PREDICTED: E3 ubiquitin-protein ligase
Cluster-3181.37266	1.0294	1.4681e-25	2.8153e-24	E3 ubiquitin-protein ligase RGLG2-like
Cluster-3181.33566	1.082	1.0938e-24	2.0154e-23	E3 ubiquitin-protein ligase RMA1H1-like
Cluster-3181.21825	2.7424	1.4894e-24	2.7269e-23	PREDICTED: E3 ubiquitin-protein ligase RGLG2 isoform X1
Cluster-3181.23959	-1.005	2.7921e-24	5.0533e-23	E3 ubiquitin-protein ligase SHPRH-like isoform X1
Cluster-3181.33565	3.0661	7.0562e-22	1.1442e-20	E3 ubiquitin-protein ligase RMA1H1-like
Cluster-3181.43391	4.2135	2.696e-21	4.2399e-20	probable E3 ubiquitin-protein ligase BAH1-like 1
Cluster-10254.0	2.2193	6.4889e-15	7.0674e-14	E3 ubiquitin-protein ligase RZFP34-like
Cluster-3181.14206	1.385	8.1742e-15	8.8465e-14	E3 ubiquitin-protein ligase RNF14-like
Cluster-3181.37737	-1.3331	7.6879e-13	7.1943e-12	E3 ubiquitin-protein ligase At4g11680-like
Cluster-3181.29075	1.371	1.5082e-10	1.1728e-09	PREDICTED: E3 ubiquitin-protein ligase RBBP6 isoform X2
Cluster-3181.37738	-2.2245	3.3548e-09	2.2942e-08	E3 ubiquitin-protein ligase At4g11680-like
Cluster-10634.0	-1.7798	8.3939e-08	4.9694e-07	E3 ubiquitin-protein ligase RHA1B-like
Cluster-1908.0	6.9268	2.7783e-07	1.5535e-06	probable E3 ubiquitin-protein ligase BAH1-like 1
Cluster-3181.5632	-1.0094	1.4391e-06	7.4016e-06	PREDICTED: E3 ubiquitin-protein ligase SDIR1 isoform X1
Cluster-3181.42131	6.3528	6.8086e-06	3.221e-05	E3 ubiquitin-protein ligase rnf4-like protein
Cluster-3181.22952	1.3458	0.0001821	0.00070016	PREDICTED: E3 ubiquitin-protein ligase RHF2A
Cluster-3181.30936	2.7494	0.0014367	0.0047019	PREDICTED: probable E3 ubiquitin-protein ligase ARI9
Cluster-3181.14183	2.2571	0.0021592	0.0068185	E3 ubiquitin-protein ligase UPL3
Cluster-10086.0	-4.8125	0.0032647	0.0099278	E3 ubiquitin-protein ligase RING1-like
Cluster-3181.36644	2.005	0.0068594	0.019384	probable E3 ubiquitin-protein ligase LOG2
Cluster-3181.22449	1.6718	0.011517	0.030742	PREDICTED: E3 ubiquitin-protein ligase SHPRH
Cluster-3181.32628	2.5265	6.0055e-197	1.7154e-194	PREDICTED: probable E3 ubiquitin-protein ligase BAH1-like 1
Cluster-3181.38997	1.8455	4.7849e-77	3.3712e-75	PREDICTED: E3 ubiquitin-protein ligase RMA1H1-like
Cluster-3181.30599	2.4515	9.8369e-75	6.7134e-73	PREDICTED: E3 ubiquitin-protein ligase PUB23-like
Cluster-3181.14894	1.5825	1.284e-56	6.0488e-55	PREDICTED: E3 ubiquitin-protein ligase RHA1B-like
Cluster-3181.2717	1.9226	8.0109e-33	2.0076e-31	PREDICTED: probable E3 ubiquitin-protein ligase ZFP1
Cluster-3181.31447	1.319	1.1642e-27	2.4232e-26	PREDICTED: E3 ubiquitin-protein ligase CHIP-like
Cluster-3181.39946	-1.7149	1.1197e-23	1.9672e-22	PREDICTED: E3 ubiquitin-protein ligase COP1
Cluster-3181.17154	1.3748	2.4432e-20	3.6696e-19	PREDICTED: probable E3 ubiquitin-protein ligase ZFP1
Cluster-9252.0	-2.2846	1.9147e-13	1.8754e-12	PREDICTED: E3 ubiquitin-protein ligase MIEL1
Cluster-3181.23016	1.1095	4.6081e-08	2.806e-07	PREDICTED: E3 ubiquitin-protein ligase RNF170-like
Cluster-3181.14446	1.7178	1.2153e-07	7.0836e-07	PREDICTED: E3 ubiquitin-protein ligase XBAT32-like
Cluster-3181.14204	1.0521	4.5134e-05	0.00019081	PREDICTED: E3 ubiquitin-protein ligase RNF14-like
Cluster-3181.3140	4.9153	0.00095989	0.003247	PREDICTED: E3 ubiquitin-protein ligase BRE1-like 1
Cluster-12691.0	4.3296	0.0065004	0.018498	PREDICTED: E3 ubiquitin-protein ligase TRAIP
Cluster-3181.3867	-1.2245	0.010061	0.02726	PREDICTED: E3 ubiquitin-protein ligase ATL4
Cluster-3181.25717	2.2077	1.8043e-199	5.3475e-197	E3 ubiquitin-protein ligase makorin
Cluster-3181.24768	1.2517	3.2397e-105	3.6134e-103	E3 ubiquitin-protein ligase MARCH6
Cluster-3181.25417	1.043	2.3094e-74	1.5659e-72	E3 ubiquitin-protein ligase UBR4
Cluster-3181.1964	2.3262	1.0148e-46	3.7839e-45	E3 ubiquitin-protein ligase RNF38/44
Cluster-3181.29076	1.3197	3.8317e-38	1.1437e-36	E3 ubiquitin-protein ligase RBBP6
Cluster-3181.4762	1.4829	4.1412e-36	1.1588e-34	E3 ubiquitin-protein ligase ATL6/9/15/31/42/55
Cluster-3181.10091	1.5582	4.6935e-35	1.264e-33	E3 ubiquitin-protein ligase BIG BROTHER and related proteins
Cluster-3181.10092	1.6163	4.0278e-33	1.0183e-31	E3 ubiquitin-protein ligase BIG BROTHER and related proteins
Cluster-3181.29323	1.3224	4.3168e-32	1.0583e-30	E3 ubiquitin-protein ligase RNF13
Cluster-3181.37761	2.4345	1.6209e-17	2.087e-16	E3 ubiquitin-protein ligase BIG BROTHER and related proteins
Cluster-3181.10731	-2.0489	6.0807e-12	5.3072e-11	E3 ubiquitin-protein ligase Topors
Cluster-3181.21524	-1.053	2.8879e-10	2.1865e-09	E3 ubiquitin-protein ligase SHPRH
Cluster-3181.2125	-1.6476	7.7718e-09	5.1245e-08	E3 ubiquitin-protein ligase BAH
Cluster-3181.30697	1.474	3.1325e-08	1.9393e-07	E3 ubiquitin-protein ligase DRIP
Cluster-3181.9019	-1.2098	1.5156e-07	8.727e-07	E3 ubiquitin-protein ligase ATL10/75/76/77/78
Cluster-3181.5938	-2.1827	4.5157e-05	0.0001909	E3 ubiquitin-protein ligase ATL6/9/15/31/42/55
Cluster-12607.0	1.2551	0.0009859	0.0033286	E3 ubiquitin-protein ligase ATL7/58/59
Cluster-3181.25649	-2.3302	1.6236e-67	9.6692e-66	Probable E3 ubiquitin-protein ligase WAVH2
Cluster-3181.33384	-1.2071	8.707e-36	2.4013e-34	E3 ubiquitin-protein ligase WAVH1
Cluster-3181.42335	1.5278	5.7957e-30	1.3081e-28	E3 ubiquitin-protein ligase hel2
Cluster-3181.38728	1.1308	1.2024e-28	2.5942e-27	E3 ubiquitin-protein ligase
Cluster-11159.1	-1.9591	4.2082e-17	5.272e-16	E3 ubiquitin-protein ligase WAV3
Cluster-3181.40988	-3.7501	2.084e-14	2.1922e-13	Probable E3 ubiquitin-protein ligase
Cluster-3181.22296	-1.0095	2.0074e-12	1.8228e-11	E3 ubiquitin-protein ligase RING1
Cluster-991.0	8.0876	1.0124e-10	8.0018e-10	E3 ubiquitin-protein ligase WAV3
Cluster-7269.1	5.9923	8.6237e-05	0.00034924	E3 ubiquitin-protein ligase WAVH1
Cluster-3181.32193	-1.3858	0.00061607	0.0021588	E3 ubiquitin-protein ligase mib1
Cluster-12211.2	1.7743	0.0057229	0.016488	Probable E3 ubiquitin-protein ligase HERC1
Cluster-933.0	4.9318	0.0068134	0.019269	Probable E3 ubiquitin-protein ligase ARI5
Cluster-3181.32850	-1.1696	0.015116	0.03899	E3 ubiquitin-protein ligase AIRP2
Cluster-3181.7229	-1.7631	0.017383	0.044092	E3 ubiquitin-protein ligase RNF167
Cluster-3181.22145	-1.6629	3.0458e-115	3.8379e-113	serine/threonine-protein kinase SRK2
Cluster-3181.22372	1.3855	5.7121e-47	2.1451e-45	serine/threonine-protein kinase SRK2
Cluster-3181.27509	1.0667	0.0022556	0.0070948	serine/threonine-protein kinase SRK2
Cluster-3181.25198	-1.4437	5.8111e-107	6.5743e-105	protein phosphatase 2C 37
Cluster-3181.25209	2.0991	3.7657e-102	3.9686e-100	probable protein phosphatase 2C 22 isoform X2
Cluster-3181.24186	1.1809	4.1226e-55	1.8818e-53	PREDICTED: probable protein phosphatase 2C 15
Cluster-3181.27944	1.0296	2.6589e-46	9.8043e-45	probable protein phosphatase 2C 58
Cluster-3181.26312	-1.6854	7.2269e-13	6.784e-12	probable protein phosphatase 2C 10
Cluster-14675.1	-2.7235	2.0526e-11	1.7165e-10	PREDICTED: probable protein phosphatase 2C 60
Cluster-9898.0	-1.0457	6.4682e-10	4.737e-09	PREDICTED: probable protein phosphatase 2C 35
Cluster-3181.21530	-1.4605	2.9498e-08	1.8316e-07	protein phosphatase 2C 37
Cluster-3181.1832	7.0963	7.4963e-08	4.4644e-07	PREDICTED: probable protein phosphatase 2C 21 isoform X1
Cluster-3181.29893	-1.5142	2.1955e-06	1.1058e-05	probable protein phosphatase 2C 62 isoform X2
Cluster-3181.40331	-2.9339	0.0036999	0.011113	probable protein phosphatase 2C 76
Cluster-3181.4314	4.3744	0.0069439	0.0196	probable protein phosphatase 2C 51 isoform X1
Cluster-3181.25087	-1.3672	1.9192e-89	1.6197e-87	PREDICTED: probable protein phosphatase 2C 25
Cluster-3181.35402	-1.1131	4.291e-24	7.6933e-23	PREDICTED: probable protein phosphatase 2C 27
Cluster-3181.27513	1.1184	1.8412e-21	2.9219e-20	PREDICTED: protein phosphatase 2C 70
Cluster-3181.15177	2.23	1.2576e-11	1.0682e-10	PREDICTED: protein phosphatase 2C 34
Cluster-3181.44807	2.0303	1.1672e-09	8.3524e-09	PREDICTED: protein phosphatase 2C 50
Cluster-3181.4532	7.7404	4.4639e-09	3.011e-08	PREDICTED: probable protein phosphatase 2C 33
Cluster-3181.23795	-1.1035	4.0691e-05	0.00017311	PREDICTED: probable protein phosphatase 2C 60
Cluster-3181.43876	3.9684	0.0044089	0.013017	PREDICTED: probable protein phosphatase 2C 5
Cluster-3181.38077	1.5912	1.2228e-65	6.9483e-64	Probable protein phosphatase 2C 51
Cluster-3181.29051	1.1394	2.6853e-26	5.2941e-25	Probable protein phosphatase 2C 12
Cluster-3181.28903	-2.3978	0.00051634	0.0018386	protein phosphatase 2C
Cluster-3181.15123	-2.4814	1.2404e-16	1.5132e-15	Abscisic acid 8'-hydroxylase 3
Cluster-3181.28563	-1.9493	9.5812e-08	5.6438e-07	Abscisic acid 8'-hydroxylase CYP707A2
Cluster-3181.29258	-1.3766	7.6886e-06	3.6119e-05	Abscisic acid 8'-hydroxylase CYP707A1
Cluster-3181.28564	-4.1962	3.0621e-05	0.00013278	PREDICTED: abscisic acid 8'-hydroxylase 1-like
Cluster-3181.27957	-1.514	5.6375e-16	6.5966e-15	9-cis-epoxycarotenoid dioxygenase
Cluster-3181.25417	1.043	2.3094e-74	1.5659e-72	auxin transport protein BIG
Cluster-3181.22115	-1.5006	2.8694e-57	1.364e-55	PREDICTED: auxin response factor 3 isoform X2
Cluster-3181.1782	-3.0439	1.6988e-47	6.4761e-46	GH3 auxin-responsive promoter
Cluster-3181.8954	-3.6281	9.1802e-43	3.1024e-41	auxin-responsive protein SAUR71-like
Cluster-3181.21410	-1.5812	7.9796e-35	2.1372e-33	auxin-responsive protein SAUR72-like
Cluster-3181.10470	-2.1456	1.0221e-33	2.6413e-32	auxin-repressed 12.5 kDa protein-like
Cluster-3181.24355	-1.0543	1.76e-30	4.0476e-29	auxin-responsive protein IAA27-like isoform X2
Cluster-3874.0	-3.3096	6.5733e-25	1.2248e-23	auxin-binding protein ABP19a-like
Cluster-3181.43104	7.4369	2.2849e-22	3.7939e-21	auxin-responsive protein SAUR50-like
Cluster-3181.21539	-1.1836	3.1379e-22	5.1626e-21	PREDICTED: auxin response factor 18
Cluster-3181.4824	-9.6828	5.7837e-16	6.7601e-15	auxin response factor 8-like isoform X2
Cluster-3181.13823	-1.398	6.3367e-15	6.908e-14	PREDICTED: auxin-responsive protein SAUR21-like
Cluster-5516.0	-1.4015	1.0357e-12	9.6105e-12	auxin transporter-like protein 2
Cluster-3181.12069	1.3219	1.1681e-12	1.0806e-11	PREDICTED: auxin-responsive protein IAA4
Cluster-8062.0	-1.7267	1.7748e-10	1.3714e-09	auxin response factor 18-like
Cluster-9013.0	-4.4338	4.2951e-10	3.1944e-09	auxin-binding protein ABP19b-like
Cluster-3181.22350	-2.3379	6.3334e-10	4.6463e-09	auxin-responsive protein SAUR50-like
Cluster-3181.3423	2.3991	1.0203e-09	7.3496e-09	auxin response factor 11
Cluster-3181.3889	7.3242	1.6853e-08	1.0729e-07	auxin-independent growth promoter-like protein, mRNA
Cluster-3181.4854	-2.4461	1.1511e-05	5.2912e-05	auxin-responsive protein IAA33-like
Cluster-6054.0	-5.5125	0.00017769	0.00068434	auxin-responsive protein SAUR21-like
Cluster-3181.582	-1.2851	0.00026645	0.00099628	auxin-induced protein IAA6-like
Cluster-8521.0	-1.8543	0.0013919	0.0045681	PREDICTED: auxin-responsive protein SAUR21
Cluster-3181.13322	-1.7739	0.0023304	0.0073083	auxin-responsive protein SAUR50-like
Cluster-9336.0	-4.6755	0.0059061	0.016963	probable auxin efflux carrier component 1b
Cluster-3181.6967	-2.6176	0.010205	0.027618	auxin-binding protein ABP19a-like
Cluster-3181.8007	-1.1455	0.019314	0.048301	probable auxin efflux carrier component 1b isoform X1
Cluster-3181.22849	1.7415	3.5586e-62	1.8941e-60	PREDICTED: auxin-responsive protein IAA14
Cluster-3549.0	-2.4304	1.7574e-41	5.7572e-40	PREDICTED: auxin-binding protein ABP19a-like
Cluster-3181.26669	-1.4329	5.65e-25	1.0556e-23	PREDICTED: auxin efflux carrier component 4-like
Cluster-3181.25760	-1.8534	6.3327e-19	8.8113e-18	PREDICTED: Chenopodium quinoa auxin response factor 18-like
Cluster-1062.0	7.889	3.9846e-10	2.9709e-09	PREDICTED: auxin-induced protein 15A-like
Cluster-3181.16581	-1.8353	2.9625e-09	2.0372e-08	PREDICTED: auxin-responsive protein SAUR21-like
Cluster-3181.28736	-1.3653	1.6463e-07	9.4473e-07	PREDICTED: auxin-induced protein 10A5-like
Cluster-3181.40424	-1.7444	1.0744e-06	5.6113e-06	PREDICTED: probable auxin efflux carrier component 1b
Cluster-3181.37743	1.2109	1.1497e-06	5.984e-06	PREDICTED: auxin-responsive protein SAUR36-like
Cluster-3181.19018	-3.8771	1.5579e-06	7.9833e-06	PREDICTED: auxin-responsive protein SAUR72-like
Cluster-3181.1928	3.0069	7.9359e-06	3.7228e-05	PREDICTED: auxin-responsive protein SAUR66-like
Cluster-13404.0	-1.2349	0.0001888	0.00072445	PREDICTED: auxin-binding protein ABP19b
Cluster-3181.6910	1.3146	0.0011025	0.0036904	PREDICTED: auxin-responsive protein IAA12-like
Cluster-3181.40527	-4.1587	0.0056757	0.016358	PREDICTED: auxin-induced protein 22D-like
Cluster-3181.10806	-2.1492	0.0094898	0.025877	PREDICTED: auxin response factor 18-like
Cluster-3181.6909	-1.6376	5.3726e-39	1.6456e-37	auxin-responsive protein IAA
Cluster-3181.33944	-1.4875	1.301e-21	2.0781e-20	auxin responsive GH3 gene family
Cluster-1516.0	9.3572	1.0089e-14	1.084e-13	auxin responsive GH3 gene family
Cluster-3181.4790	-2.1245	1.3719e-07	7.9387e-07	auxin-responsive protein IAA
Cluster-8707.0	-1.3517	3.9132e-05	0.00016696	auxin responsive GH3 gene family
Cluster-3181.17498	3.678	0	0	auxin-responsive protein SAUR36
Cluster-3181.29271	3.0386	1.301e-86	1.0583e-84	auxin-responsive protein SAUR15
Cluster-3181.22025	-1.8201	1.6989e-07	9.7287e-07	auxin-responsive protein SAUR76
Cluster-7826.0	2.0529	2.2265e-05	9.8436e-05	auxin-responsive protein IAA13
Cluster-3181.35093	3.2715	5.4927e-26	1.0682e-24	auxin responsive protein
Cluster-3181.9999	1.1671	1.2729e-20	1.9447e-19	auxin responsive protein
Cluster-3181.18874	-3.6072	0.00073012	0.0025236	auxin binding protein
Cluster-4150.0	-1.5641	0.0086288	0.023799	auxin responsive protein
Cluster-3181.32829	2.8702	6.4715e-81	4.8751e-79	gibberellin 2-beta-dioxygenase-like
Cluster-3181.2579	3.8637	6.9117e-33	1.7335e-31	gibberellin 2-beta-dioxygenase 8-like isoform X1
Cluster-3181.32171	-1.0955	2.7254e-22	4.5069e-21	PREDICTED: gibberellin receptor GID1C
Cluster-3181.44749	1.889	1.3679e-10	1.067e-09	PREDICTED: gibberellin 3-beta-dioxygenase 1-like
Cluster-1221.0	7.3657	2.5631e-08	1.6e-07	gibberellin-regulated protein 4-like
Cluster-3181.17117	-1.8657	0.0092899	0.025385	gibberellin-regulated protein 6-like
Cluster-3181.16332	2.1487	6.0052e-72	3.8644e-70	gibberellin-regulated protein 1
Cluster-4101.0	-3.1437	3.0323e-08	1.88e-07	gibberellin-regulated protein 13
Cluster-9936.0	-1.9377	3.2923e-08	2.0346e-07	gibberellin 2-beta-dioxygenase 6
Peroxisome related genes
GeneID	log2FoldChange	pval	padj	Gene annotation
Cluster-3181.25014	-1.2017	2.5914e-32	6.4078e-31	Superoxide dismutase [Cu-Zn], chloroplastic
Cluster-3181.11036	-1.5405	3.4505e-09	2.3548e-08	Superoxide dismutase [Fe] 3, chloroplastic isoform X1
Cluster-3181.17052	-1.948	1.0616e-08	6.8981e-08	Superoxide dismutase [Cu-Zn]-like
Cluster-3181.8774	-2.7721	3.1545e-18	4.237e-17	PREDICTED: Superoxide dismutase [Cu-Zn], chloroplastic-like
Cluster-3181.20848	-1.3897	2.2873e-16	2.753e-15	PREDICTED: Superoxide dismutase [Cu-Zn], chloroplastic-like
Cluster-3181.17050	9.3911	3.7065e-15	4.1129e-14	PREDICTED: Superoxide dismutase [Cu-Zn]
Cluster-3181.20349	-4.3476	1.4059e-09	9.9699e-09	Superoxide dismutase
Cluster-3181.5236	-5.3753	0.00029838	0.0011065	Iron/manganese Superoxide dismutases, alpha-hairpin domain
Cluster-3181.17045	-1.0382	0.002826	0.008708	Iron/manganese Superoxide dismutases
Cluster-3181.4566	4.3794	8.0451e-112	9.8234e-110	Peroxidase
Cluster-3181.15643	-2.78	3.0716e-97	2.9694e-95	Peroxidase
Cluster-3181.33631	1.5063	2.4161e-51	1.0209e-49	Peroxidase
Cluster-3181.34951	3.9834	1.0531e-26	2.1085e-25	Peroxidase
Cluster-3181.26488	1.1899	5.9118e-25	1.1041e-23	Peroxidase
Cluster-3181.27847	-1.8846	1.2478e-19	1.8e-18	Peroxidase
Cluster-3181.31433	-1.2077	5.3543e-18	7.0875e-17	Peroxidase
Cluster-709.0	10.216	1.4725e-17	1.8989e-16	Peroxidase P7-like
Cluster-3181.13119	1.6599	2.9556e-15	3.2994e-14	Peroxidase
Cluster-13133.0	-3.0122	3.5429e-10	2.6547e-09	Peroxidase
Cluster-3181.32040	1.3361	2.3675e-09	1.6431e-08	Peroxidase
Cluster-7883.0	3.6835	1.0796e-06	5.6377e-06	Peroxidase
Cluster-3181.34952	6.038	5.1097e-06	2.4582e-05	Peroxidase
Cluster-13662.0	3.9742	1.5927e-05	7.1893e-05	Peroxidase
Cluster-3181.44755	-5.589	2.1119e-05	9.3689e-05	Peroxidase
Cluster-3181.15467	-1.8362	5.3634e-05	0.00022406	Peroxidase
Cluster-5830.0	-3.9842	0.0094473	0.025772	Peroxidase
Cluster-11009.0	2.0226	0.01158	0.030891	Peroxidase
Cluster-3181.17459	-1.8509	6.6007e-104	7.1843e-102	Peroxidase
Cluster-3181.23805	-1.4348	2.803e-51	1.182e-49	L-ascorbate Peroxidase
Cluster-3181.2585	6.4704	6.0017e-47	2.2525e-45	Peroxidase
Cluster-3181.23311	-2.0026	2.0496e-43	7.0396e-42	Peroxidase
Cluster-3181.26396	-1.0052	1.2705e-23	2.2291e-22	PREDICTED: L-ascorbate Peroxidase, cytosolic
Cluster-3181.20948	-1.5839	7.4158e-20	1.0837e-18	PREDICTED: Peroxidase 12-like
Cluster-3181.36779	1.6851	1.3364e-14	1.4246e-13	PREDICTED: putative L-ascorbate Peroxidase 6
Cluster-3181.30821	-8.5154	2.6224e-12	2.3623e-11	PREDICTED: Peroxidase P7-like
Cluster-3181.9578	7.6107	1.2571e-09	8.9592e-09	PREDICTED: Peroxidase 5-like
Cluster-3181.1682	6.518	5.4514e-09	3.6474e-08	PREDICTED: Peroxidase 12
Cluster-3181.14662	2.0464	4.6488e-08	2.8287e-07	PREDICTED: Peroxidase 66-like
Cluster-3181.24383	6.5133	4.2765e-07	2.339e-06	PREDICTED: Peroxidase 12-like
Cluster-12034.0	-2.1215	8.8551e-07	4.6654e-06	PREDICTED: Peroxidase 12-like
Cluster-3181.12261	5.3087	5.4714e-06	2.6202e-05	PREDICTED: Peroxidase 64
Cluster-3181.36778	-1.1654	2.1638e-05	9.5879e-05	PREDICTED: putative L-ascorbate Peroxidase 6
Cluster-3181.33646	-1.2099	0.00096177	0.0032529	PREDICTED: Peroxidase 64
Cluster-3181.30267	1.1699	6.5878e-05	0.00027151	Peroxidase
Cluster-3181.1592	7.6719	3.9898e-10	2.9743e-09	L-ascorbate Peroxidase 1, cytosolic
Cluster-3181.22680	1.7354	1.2628e-212	4.2402e-210	Glutathione Peroxidase
Cluster-3181.19946	1.2211	4.4049e-47	1.6611e-45	Glutathione Peroxidase
Cluster-3181.8854	-1.1714	1.2552e-14	1.3408e-13	Peroxidase
Cluster-3181.42490	7.3319	1.572e-08	1.003e-07	Peroxidase
Proline related genes
GeneID	log2FoldChange	pval	padj	Gene annotation
Cluster-3181.6500	-2.5035	2.6307e-17	3.3421e-16	PREDICTED: pyrroline-5-carboxylate reductase
Cluster-3181.25292	2.0829	0	0	proline-rich receptor-like protein kinase PERK1
Cluster-3181.39214	2.6409	1.7633e-78	1.278e-76	proline-rich receptor-like protein kinase PERK8
Cluster-3181.26450	1.3264	4.2557e-76	2.9425e-74	hydroxyproline O-galactosyltransferase GALT6-like
Cluster-3181.24497	-1.0846	2.6526e-36	7.469e-35	proline-rich protein 36-like isoform X1
Cluster-3181.15251	-2.9697	3.5313e-26	6.9253e-25	proline-rich receptor-like protein kinase PERK1 isoform X1
Cluster-3181.3504	10.451	1.9802e-18	2.6866e-17	proline-rich receptor-like protein kinase PERK15
Cluster-11554.0	-1.8197	2.415e-16	2.9028e-15	PREDICTED: proline-rich protein 36-like
Cluster-8944.0	-2.1704	8.3913e-10	6.0867e-09	36.4 kDa proline-rich protein isoform X2
Cluster-3181.31328	-1.5548	1.1935e-08	7.7064e-08	proline-rich receptor-like protein kinase PERK15
Cluster-3181.5802	1.0836	1.6903e-06	8.6302e-06	hydroxyproline O-galactosyltransferase GALT6-like
Cluster-3181.31329	-1.3695	2.6029e-05	0.00011386	proline-rich receptor-like protein kinase PERK3
Cluster-3181.5737	3.3316	0.00021845	0.00082815	proline-rich receptor-like protein kinase PERK9
Cluster-7920.0	1.8021	0.00036012	0.0013188	betaine/proline transporter
Cluster-3181.5642	2.7603	0.00079358	0.0027234	hydroxyproline O-arabinosyltransferase 1-like
Cluster-13920.0	-4.372	0.0032395	0.0098576	14 kDa proline-rich protein DC2.15-like
Cluster-3181.18737	-1.1173	0.0096272	0.026211	large proline-rich protein BAG6 isoform X1
Cluster-13845.0	-4.326	0.016791	0.04276	acidic proline-rich protein PRP25-like
Cluster-3181.26698	1.4546	1.9035e-81	1.4513e-79	proline rich 7
Cluster-3181.35157	1.4689	4.291e-63	2.3271e-61	PREDICTED: proline-rich receptor-like protein kinase PERK3
Cluster-3181.2862	1.5021	2.6368e-13	2.5554e-12	PREDICTED: proline-rich protein 1-like
Cluster-3181.5389	1.6783	1.1887e-05	5.4531e-05	PREDICTED: proline-rich protein
Cluster-3181.13959	1.6599	0.00033088	0.0012177	PREDICTED: proline-rich receptor-like protein kinase PERK1
Cluster-4310.0	-1.9686	0.00073899	0.0025517	PREDICTED: proline-rich receptor-like protein kinase PERK14
Cluster-3181.19690	-2.385	0.00074874	0.002582	PREDICTED: proline-rich
Cluster-3181.18140	3.6825	1.6921e-21	2.6894e-20	hydroxyproline O-galactosyltransferase 2/3/4/5/6
Cluster-8865.1	-1.2962	0.016582	0.0423	hydroxyproline O-galactosyltransferase HPGT
Cluster-3181.13958	-3.1426	2.6101e-31	6.1967e-30	36.4 kDa proline-rich protein
Cluster-3181.33203	1.042	1.0389e-30	2.4094e-29	proline-rich receptor-like protein kinase PERK9
Cluster-3181.30720	-1.3105	8.8757e-23	1.501e-21	proline-rich receptor-like protein kinase PERK14
Cluster-3181.33927	-1.4643	1.0624e-15	1.2208e-14	proline-rich receptor-like protein kinase PERK1
Cluster-3181.32444	-1.6451	2.9046e-11	2.3997e-10	proline-rich receptor-like protein kinase PERK13
Cluster-3181.15064	-1.5115	5.8254e-07	3.1346e-06	proline-rich receptor-like protein kinase PERK8
Cluster-938.0	4.951	0.0047756	0.014002	14 kDa proline-rich protein DC2.15
Cluster-3181.39166	4.2066	4.9641e-139	8.3789e-137	AdoMet dependent proline di-methyltransferase
Cluster-3181.25873	-3.0598	2.3565e-103	2.5256e-101	AdoMet dependent proline di-methyltransferase
Cluster-3181.7138	3.5355	4.3357e-99	4.3723e-97	AdoMet dependent proline di-methyltransferase
Cluster-3181.1339	6.3378	2.4097e-96	2.3084e-94	AdoMet dependent proline di-methyltransferase
Cluster-3181.24090	-1.1525	2.4824e-77	1.7608e-75	AdoMet dependent proline di-methyltransferase
Cluster-3181.27753	-3.8965	9.3358e-65	5.2155e-63	proline rich region
Cluster-3181.24343	-1.0012	1.6507e-51	7.0123e-50	proline rich region
Cluster-3181.22777	-2.0194	6.1382e-33	1.5426e-31	AdoMet dependent proline di-methyltransferase
Cluster-3181.30927	-3.4627	2.0166e-27	4.1494e-26	proline rich region
Cluster-3181.4801	2.0617	4.9325e-16	5.7974e-15	proline-rich AKT1 substrate 1
Cluster-3181.34896	1.0786	1.2145e-12	1.1222e-11	AdoMet dependent proline di-methyltransferase
Cluster-3181.1716	-2.7897	7.4539e-12	6.4601e-11	AdoMet dependent proline di-methyltransferase
Cluster-3181.37113	-8.1963	2.374e-11	1.9755e-10	L-proline 3-hydroxylase, C-terminal
Cluster-3181.9694	-1.1078	4.307e-09	2.9095e-08	proline rich region
Cluster-3181.37865	-1.376	9.1062e-09	5.9571e-08	proline rich region
Cluster-11447.0	1.5486	0.0008064	0.0027643	AdoMet dependent proline di-methyltransferase
Cluster-10203.0	-5.1826	0.001144	0.0038184	AdoMet dependent proline di-methyltransferase
Cluster-11385.0	-2.2988	0.0014404	0.004713	AdoMet dependent proline di-methyltransferase
Cluster-3181.42143	2.385	0.0038592	0.011542	proline rich region
Cell membrane related genes
GeneID	log2FoldChange	pval	padj	Gene annotation
Cluster-3181.25511	-1.3339	1.7801e-92	1.5738e-90	Aquaporin PIP-type
Cluster-3181.23043	-2.2553	9.4047e-61	4.819e-59	Aquaporin NIP2-1
Cluster-3181.6733	1.786	3.2143e-52	1.3785e-50	Aquaporin TIP2-1
Cluster-3181.29109	-1.6038	9.4952e-21	1.462e-19	Aquaporin SIP1-1
Cluster-3181.20873	-3.105	1.3453e-08	8.652e-08	Probable Aquaporin NIP-type
Cluster-14803.0	2.5119	5.334e-05	0.00022292	Probable Aquaporin NIP-type
Cluster-3048.0	3.5872	0.0048159	0.014105	Probable Aquaporin PIP2-5
Cluster-3181.23683	-1.8932	6.285e-87	5.1327e-85	Probable Aquaporin NIP5-1
Cluster-3181.13905	-2.3665	1.2048e-38	3.6513e-37	Aquaporin NIP1-2
Cluster-3181.25991	-1.1786	2.381e-31	5.6635e-30	Aquaporin PIP2-1
Cluster-7561.0	-2.2187	3.4022e-07	1.884e-06	Probable Aquaporin PIP1-4
Cluster-3181.5895	-3.2401	0.00068256	0.0023712	Aquaporin TIP1-3
Cluster-3181.21721	-1.9713	6.4477e-12	5.6165e-11	Aquaporin PIP2-1
Cluster-3181.38348	-3.2945	0.0033799	0.010242	Putative Aquaporin NIP4-1
Cluster-3181.36500	-1.0006	1.3817e-11	1.1706e-10	Probable Aquaporin SIP2-1
Cluster-3181.4141	4.1016	1.7428e-18	2.3706e-17	Late embryogenesis abundant protein ECP63
Cluster-3181.29888	-1.536	2.7726e-12	2.4937e-11	Late embryogenesis abundant protein
Cluster-7757.0	2.6762	6.0808e-12	5.3072e-11	Late embryogenesis abundant protein D-34
Cluster-3181.8106	1.1292	2.6706e-08	1.6642e-07	Late embryogenesis abundant protein 46
Cluster-3181.41270	-2.387	6.4198e-07	3.4368e-06	Late embryogenesis abundant protein D-34
Cluster-3181.31867	7.8749	0	0	Linoleate 13S-lipoxygenase 3-1, chloroplastic
Cluster-3181.18046	1.2807	5.214e-57	2.4637e-55	linoleate 13S-lipoxygenase 3-1, chloroplastic-like
Cluster-3883.0	2.4672	3.4487e-36	9.6716e-35	PREDICTED: linoleate 13S-lipoxygenase 2-1, chloroplastic-like, partial
Cluster-3181.29423	1.3204	1.4614e-31	3.5051e-30	linoleate 13S-lipoxygenase 2-1, chloroplastic-like
Cluster-3181.40248	-3.6717	5.0139e-16	5.8908e-15	probable linoleate 9S-lipoxygenase 5
Cluster-3181.13686	5.7607	1.3019e-15	1.4873e-14	Linoleate 13S-lipoxygenase 3-1, chloroplastic
Cluster-3181.40247	-7.0087	5.0348e-08	3.0514e-07	probable linoleate 9S-lipoxygenase 5
Cluster-3181.26750	-1.1532	1.8855e-06	9.5753e-06	lipoxygenase 6, chloroplastic-like
Cluster-3181.26752	-1.1368	0.00013189	0.00051917	lipoxygenase 6, chloroplastic
Cluster-3181.31045	-1.0488	0.00054041	0.0019167	lipoxygenase 6, chloroplastic-like
Cluster-3181.30850	-2.6264	0.0026635	0.0082516	lipoxygenase 6, chloroplastic-like
Cluster-3181.19600	-1.917	9.0937e-40	2.849e-38	PREDICTED: probable linoleate 9S-lipoxygenase 5
Cluster-3181.39123	2.0373	8.2669e-25	1.5318e-23	PREDICTED: probable linoleate 9S-lipoxygenase 5
Cluster-3181.18802	2.5848	5.0808e-24	9.0733e-23	PREDICTED: lipoxygenase 6, chloroplastic-like
Cluster-3181.29065	-2.2599	8.4301e-15	9.1158e-14	PREDICTED: probable linoleate 9S-lipoxygenase 5, partial mRNA
Cluster-3181.34914	-2.4165	0.00021743	0.00082481	PREDICTED: linoleate 13S-lipoxygenase 3-1, chloroplastic-like
Cluster-3181.27059	-1.2683	6.8208e-13	6.4122e-12	Linoleate 13S-lipoxygenase 2-1, chloroplastic
Cluster-3181.14479	-1.6771	0.011795	0.031372	lipoxygenase 7, chloroplastic
Cluster-3181.9641	1.1368	2.1639e-27	4.4466e-26	lipoxygenase
Cluster-3181.28349	5.3985	5.569e-20	8.191e-19	lipoxygenase
